# Supplementary material for: Zn(ii)-catalyzed asymmetric [3 + 2] cycloaddition of acyclic enones with azomethine ylides
Source: Royal Society of Chemistry journal article supplement (doi:10.1039/d4ob00854e), 2024-01-01

---

## Zn(II)-catalyzed asymmetric [3+2] cycloaddition of acyclic enones with azomethine ylides

Sundaravel Vivek Kumar, Jeremiah Olusegun and Patrick J. Guiry\*

Centre for Synthesis and Chemical Biology, School of Chemistry, University College Dublin, Belfield, Dublin 4, Ireland

| S. No. | Table of Contents                                                           | Page No. |
|--------|-----------------------------------------------------------------------------|----------|
| 1.     | General information                                                         | S1       |
| 2.     | Reaction optimization                                                       | S2-S4    |
| 3.     | General Procedure for the Zn-Catalyzed [3+2] Azomethine Ylide Cycloaddition | S5-S21   |
| 4.     | Scaled-up Synthesis of <b>3a</b> and its Derivatization                     | S22-S23  |
| 5.     | General procedure for the synthesis of Zn-complex <b>9</b>                  | S24      |
| 6.     | References                                                                  | S24-S25  |
| 7.     | X-Ray crystallographic structure and information for Zn-complex <b>9</b>    | S26-S37  |
| 8.     | Copy of NMR spectra                                                         | S38-S62  |

### 1. General Information

Unless otherwise noted, all commercial reagents were used as received without further purification.  $\text{Zn}(\text{OTf})_2$  was purchased from sigma Aldrich and used as received. Dichloromethane ( $\text{CH}_2\text{Cl}_2$ ) and tetrahydrofuran (THF) and were obtained from a PureSolv- 300-3-MD dry solvents dispenser. Standard Schlenk techniques were employed for moisture sensitive reactions. Column chromatography was performed on Davisil LC60A 40–63 micron silica gel. Thin-layer chromatography (TLC) was performed on aluminium-backed sheets purchased from Merck pre-coated with silica gel 60 F254.  $^1\text{H}$  NMR spectra were recorded on Varian-Inova spectrometers (400/500 MHz) using tetramethylsilane as an internal standard.  $^{13}\text{C}$  NMR spectra were recorded on 400/500 MHz Varian-Inova spectrometers (101 MHz and 126 MHz) using tetramethylsilane as an internal standard.  $^{19}\text{F}$  NMR spectra were recorded on a 400/500 MHz Varian-Inova spectrometer (376 MHz). HRMS were measured on a Micromass/Waters LCT mass spectrometer. Infrared spectra were recorded on a FT-IR spectrometer and are reported in terms wavenumbers ( $\nu_{\text{max}}$ ) with units of reciprocal centimetres ( $\text{cm}^{-1}$ ). High performance liquid chromatography (HPLC) or Supercritical fluid chromatography (SFC) was performed on a Waters Acquity UPC2® or Shimadzu instrument with Chiralpak® IB3, IC3 and ID3 columns. Optical rotation measurements were recorded using a Schmidt-Haensch Unipol L2000 polarimeter at 589 nm and are quoted in units of  $\text{deg dm}^{-1}\text{cm}^3 \text{g}^{-1}$  (concentration  $c$  is given in g/100 mL).

## 2. Reaction Optimization

2.1 The Ligand Screen<sup>a,b,c,d</sup>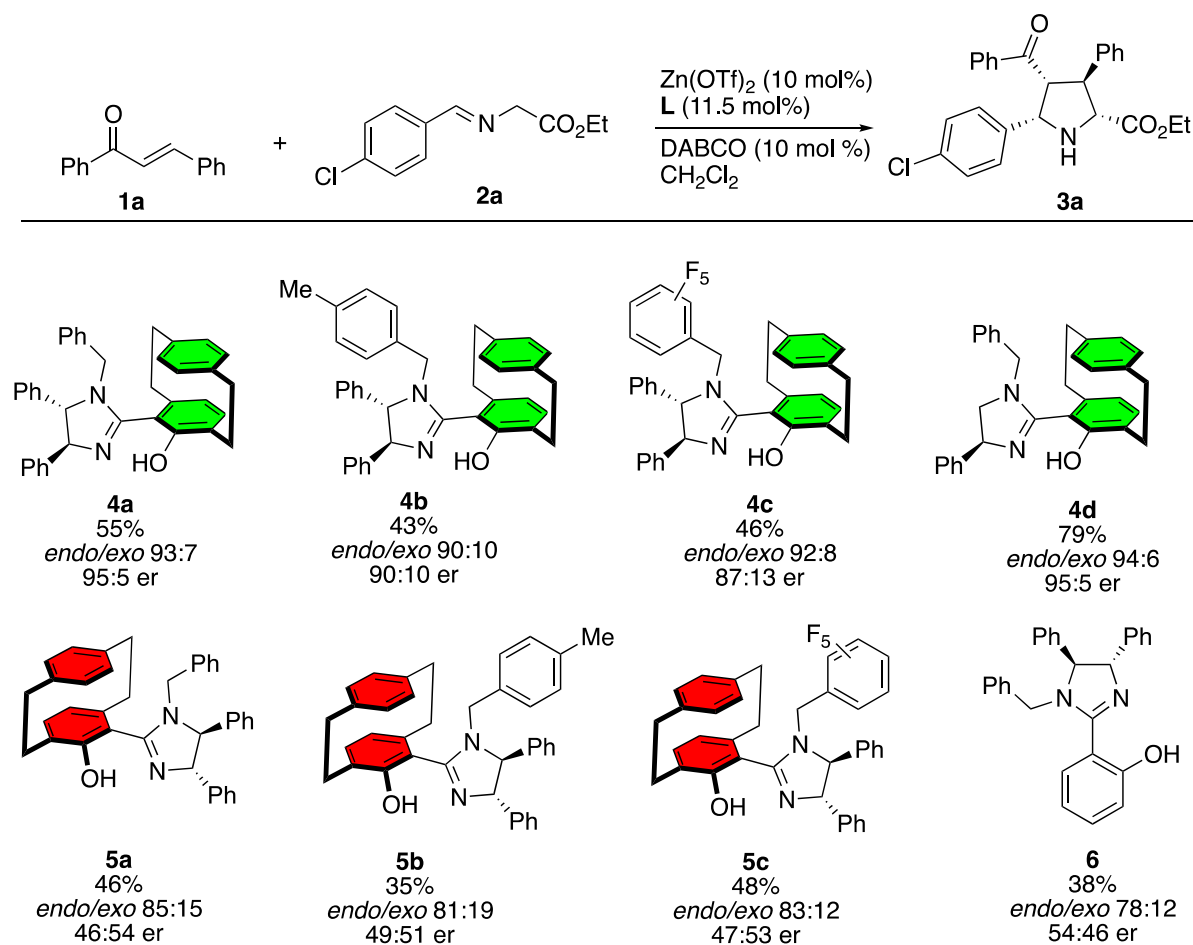

<sup>a</sup> All reactions were carried out with  $\text{Zn}(\text{OTf})_2$  (10 mol %), **L** (11.5 mol %), **1a** (0.15 mmol), **2a** (0.225 mmol), DABCO (10 mol %) in  $\text{CH}_2\text{Cl}_2$  (1.5 mL) for 24 h. <sup>b</sup> Isolated yield after purification.

<sup>c</sup> The *endo/exo* was determined by  $^1\text{H}$  NMR spectra of the crude product. <sup>d</sup> Determined by chiral HPLC analysis.

2.2 Metal Screen for **3a**<sup>a</sup>

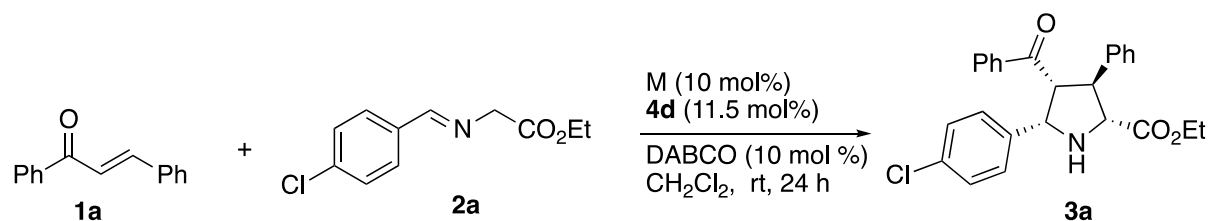

| Entry | Catalyst (10 mol%)   | Yield (%) <sup>b</sup> | <i>endo/exo</i> <sup>c</sup> | <i>er</i> <sup>d</sup> |
|-------|----------------------|------------------------|------------------------------|------------------------|
| 1     | AgOAc                | 58                     | 99:1                         | 55:45                  |
| 2     | Cu(OTf) <sub>2</sub> | trace                  | ND                           | ND                     |
| 3     | Zn(OTf) <sub>2</sub> | 79                     | 94:6                         | 94.5:5.5               |

<sup>a</sup> All reactions were carried out with metal salt (10 mol %), **4d** (11.5 mol %), **1a** (0.15 mmol), **2a** (0.225 mmol), DABCO (10 mol %) in CH<sub>2</sub>Cl<sub>2</sub> (1.5 mL) for 24 h. <sup>b</sup> Isolated yield after purification. <sup>c</sup>The *endo/exo* was determined by <sup>1</sup>H NMR spectra of the crude product. <sup>d</sup>Determined by chiral HPLC analysis.

### 2.3 Solvent Screen for **3a**<sup>a</sup>

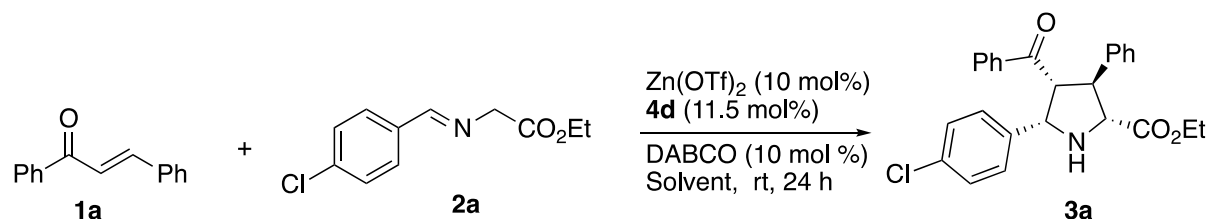

| Entry | Solvent                         | Yield (%) <sup>b</sup> | <i>endo/exo</i> <sup>c</sup> | <i>er</i> <sup>d</sup> |
|-------|---------------------------------|------------------------|------------------------------|------------------------|
| 1     | Et <sub>2</sub> O               | 19                     | 83:17                        | 95.5:4.5               |
| 2     | THF                             | 36                     | 91:9                         | 87:13                  |
| 3     | PhMe                            | 63                     | 89:11                        | 93.5:6.5               |
| 4     | CHCl <sub>3</sub>               | 73                     | 97:3                         | 94.5:5.5               |
| 5     | CH <sub>2</sub> Cl <sub>2</sub> | 79                     | 94:6                         | 94.5:5.5               |

<sup>a</sup> All reactions were carried out with Zn(OTf)<sub>2</sub> (10 mol %), **3d** (11.5 mol %), **1a** (0.15 mmol), **2a** (0.225 mmol) DABCO (10 mol %) in solvent (1.5 mL) for 24 h. <sup>b</sup> Isolated yield after purification. <sup>c</sup>The *endo/exo* was determined by <sup>1</sup>H NMR spectra of the crude product. <sup>d</sup>Determined by chiral HPLC analysis.

### 2.4 Base Screen for **3a**<sup>a</sup>



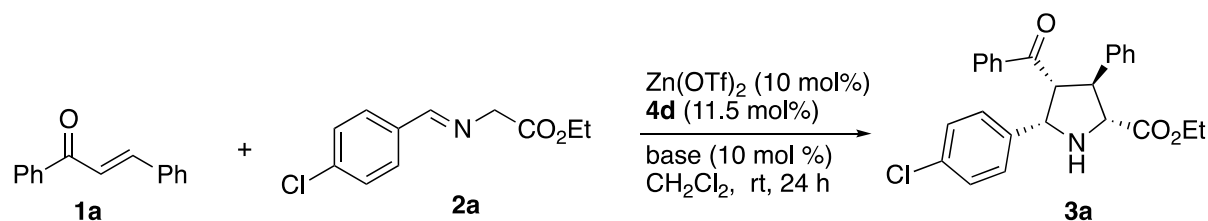

| Entry | Base                    | Yield (%) <sup>b</sup> | <i>endo/exo</i> <sup>c</sup> | <i>er</i> <sup>d</sup> |
|-------|-------------------------|------------------------|------------------------------|------------------------|
| 1     | DABCO                   | 79                     | 94:6                         | 94.5:5.5               |
| 2     | DBU                     | 48                     | 91:9                         | 84:16                  |
| 3     | DIPEA                   | 63                     | 72:18                        | 85:15                  |
| 4     | $\text{Et}_3\text{N}$   | 45                     | 97:3                         | 94.5:5.5               |
| 5     | $\text{K}_2\text{CO}_3$ | trace                  | ND                           | ND                     |

<sup>a</sup> All reactions were carried out with  $\text{Zn(OTf)}_2$  (10 mol %), **4d** (11.5 mol %), **1a** (0.15 mmol), **2a** (0.225 mmol), base (10 mol%) in  $\text{CH}_2\text{Cl}_2$  (1.5 mL) for 24 h. <sup>b</sup> Isolated yield after purification. <sup>c</sup> The *endo/exo* was determined by  $^1\text{H}$  NMR spectra of the crude product. <sup>d</sup> Determined by chiral HPLC analysis.

### 2.5 Temperature Screen for **3a**<sup>a</sup>

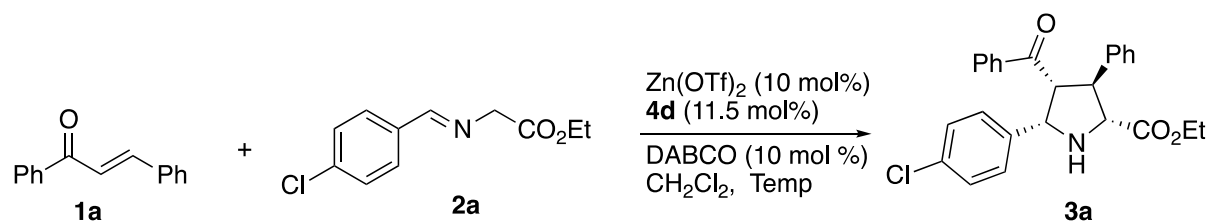

| Entry            | Temp. (°C) | Yield (%) <sup>b</sup> | <i>endo/exo</i> <sup>c</sup> | <i>er</i> <sup>d</sup> |
|------------------|------------|------------------------|------------------------------|------------------------|
| 1                | rt         | 79                     | 94:6                         | 94.5:5.5               |
| 2 <sup>e</sup>   | rt         | 90                     | 97:3                         | 94.5:5.5               |
| 3 <sup>e,f</sup> | 0          | 95                     | 99:1                         | 96.5:3.5               |
| 4 <sup>g</sup>   | 0          | 86                     | 99:1                         | 96:4                   |

<sup>a</sup> All reactions were carried out with  $\text{Zn(OTf)}_2$  (10 mol %), **4d** (11.5 mol %), **1a** (0.15 mmol), **2a** (0.225 mmol), base (10 mol%) in  $\text{CH}_2\text{Cl}_2$  (1.5 mL) for 24 h. <sup>b</sup> Isolated yield after purification. <sup>c</sup> The *endo/exo* was determined by  $^1\text{H}$  NMR spectra of the crude product. <sup>d</sup> Determined by chiral HPLC analysis. <sup>e</sup> 0.3 mmol of **2a** was used. <sup>f</sup> 48 h. <sup>g</sup>  $\text{Zn(OTf)}_2$  (5 mol %) and **4d** (5.75 mol%) for 72h.

### 3. General Procedure for the Zn-Catalyzed [3+2] Azomethine Ylide Cycloaddition

Under a nitrogen atmosphere, ligand (*S,S,S<sub>p</sub>*)-**4d** (11.5 mol %) and Zn(OTf)<sub>2</sub> (10 mol %) was added to a flame-dried 10 mL Schlenk tube. Then dry CH<sub>2</sub>Cl<sub>2</sub> (0.5 mL) was added and stirred for 60 minutes. After cooled at 0 °C, acyclic enone **1** (0.15 mmol, 1.0 equiv) in CH<sub>2</sub>Cl<sub>2</sub> (0.4 mL),  $\alpha$ -iminoester **2** (0.3 mmol, 2 equiv) in CH<sub>2</sub>Cl<sub>2</sub> (0.4 mL) and DABCO (10 mol %) in CH<sub>2</sub>Cl<sub>2</sub> (0.2 mL) were added sequentially. The reaction mixture was stirred at the same temperature for 48 h. After completion, the reaction mixture was directly purified by silica gel column chromatography (30% ethyl acetate in cyclohexane) to afford the desired product **3**. The *endo/exo* ratio was determined by <sup>1</sup>H-NMR before purification and the enantioselectivity was determined by HPLC analysis of the isolated product. The configuration of the products was assigned by comparison with the optical rotation values of prepared compounds and the reported optical rotation of the cycloadducts.<sup>1,2</sup>

**(2*R*,3*S*,4*R*,5*S*)-Ethyl-4-benzoyl-5-(4-chlorophenyl)-3-phenylpyrrolidine-2-carboxylate (**3a**)**

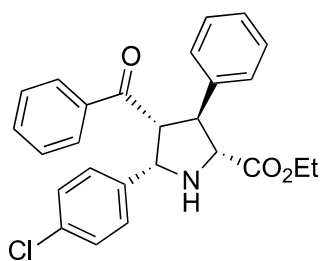

White solid, yield = 95% (62 mg); m.p.= 141 –143 °C, R<sub>f</sub> = 0.49 (cyclohexane/ethyl acetate, 3:1), [ $\alpha$ ]<sub>D</sub><sup>20</sup> = +103.67 (c = 1, CHCl<sub>3</sub>), (*endo/exo* = 99:1), 97:3 er; <sup>1</sup>H NMR (400 MHz, CDCl<sub>3</sub>)  $\delta$  7.57 – 7.55 (m, 2H), 7.46 – 7.42 (m, 1H), 7.38 – 7.22 (m, 7H), 7.06 (s, 4H), 4.97 (d, *J* = 8.6 Hz, 1H), 4.53 (dd, *J* = 8.8, 8.1 Hz, 1H), 4.26 (dq, *J* = 10.8, 7.1 Hz, 1H), 4.19 – 4.06 (m, 3H), 3.01 (s, 1H), 1.17 (t, *J* = 7.1 Hz, 3H). <sup>13</sup>C NMR (101 MHz, CDCl<sub>3</sub>)  $\delta$  198.3, 173.0, 140.4, 138.2, 137.5, 133.5, 133.2, 128.95, 128.9, 128.6, 128.4, 128.2, 128.0, 127.3, 67.7, 65.9, 61.4, 60.5, 52.6, 14.3. FT-IR (neat, cm<sup>-1</sup>): 2920.3, 2851.1, 1726.1, 1674.0, 1207.8, 1184.6, 688.4. HRMS: (ESI-TOF) calculated for C<sub>26</sub>H<sub>25</sub>ClNO<sub>3</sub> [M+H]<sup>+</sup> 434.1517, found 434.1515.

**HPLC analysis:** CHIRALPAK IC, heptane/2-propanol (50/50, 0.5 mL/min),  $\lambda$  = 254 nm, *t<sub>R</sub>* = 5.256 (minor), 6.305 (major).

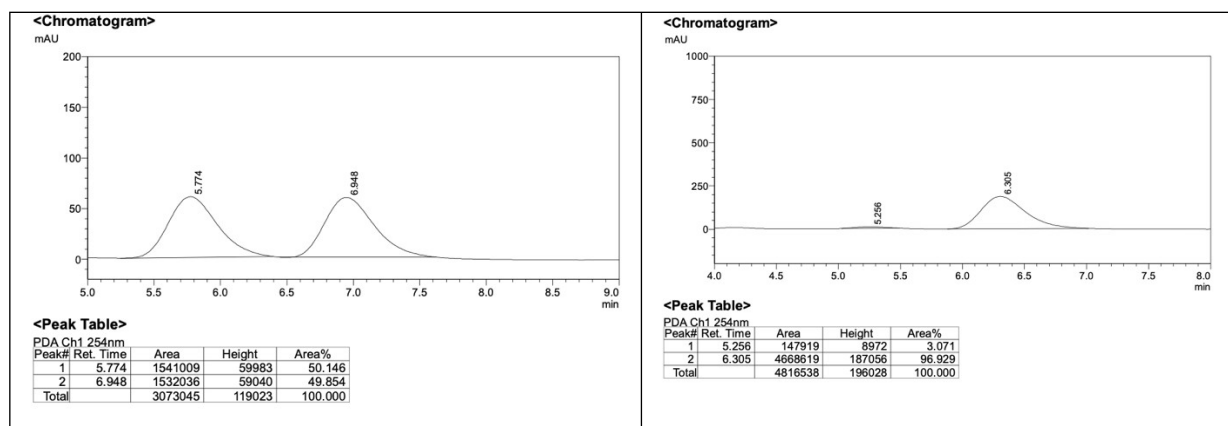

**(2*R*,3*S*,4*R*,5*S*)-Ethyl-4-benzoyl-5-(4-chlorophenyl)-3-(4-methoxyphenyl)pyrrolidine-2-carboxylate (3b)**

White solid, yield = 49% (34 mg); m.p.= 130 – 131 °C, R<sub>f</sub> = 0.39 (cyclohexane/ethyl acetate, 3:1),

$[\alpha]_D^{20} = +86.80$  (c = 1, CHCl<sub>3</sub>), (*endo/exo* = >99:1), 90:10 er; **<sup>1</sup>H NMR (400 MHz, CDCl<sub>3</sub>)** δ 7.58 – 7.56 (m, 2H), 7.44 (ddt, *J* = 7.8, 6.9, 1.3 Hz, 1H), 7.32 – 7.27 (m, 4H), 7.06 (s, 4H), 6.88 – 6.84 (m, 2H), 4.95 (d, *J* = 8.8 Hz, 1H), 4.49 (t, *J* = 8.5 Hz, 1H), 4.26 (dq, *J* = 10.7, 7.1 Hz, 1H), 4.19 – 4.13 (m, 1H), 4.11 – 4.01 (m, 2H), 3.78 (s, 3H), 2.96 (s, 1H), 1.19 (t, *J* = 7.1 Hz, 3H). **<sup>13</sup>C NMR (101 MHz, CDCl<sub>3</sub>)** δ 198.3, 173.1, 158.8, 138.4, 137.5, 133.5, 133.2, 132.3, 128.9, 128.6, 128.4, 128.2, 114.3, 67.8, 65.8, 61.4, 60.6, 55.4, 51.9, 14.3. **FT-IR (neat, cm<sup>-1</sup>):** 2922.7, 2852.7, 1729.7, 1675.4, 1513.8, 1248.9, 1178.4, 820.9. **HRMS: (ESI-TOF)** calculated for C<sub>27</sub>H<sub>27</sub>ClNO<sub>4</sub> [M+H]<sup>+</sup> 464.1623, found 464.1623.

**HPLC analysis:** CHIRALPAK IC, heptane/2-propanol (90/10, 0.5 mL/min), λ = 254 nm, t<sub>R</sub> = 12.460 min (minor), 18.542 min (major).

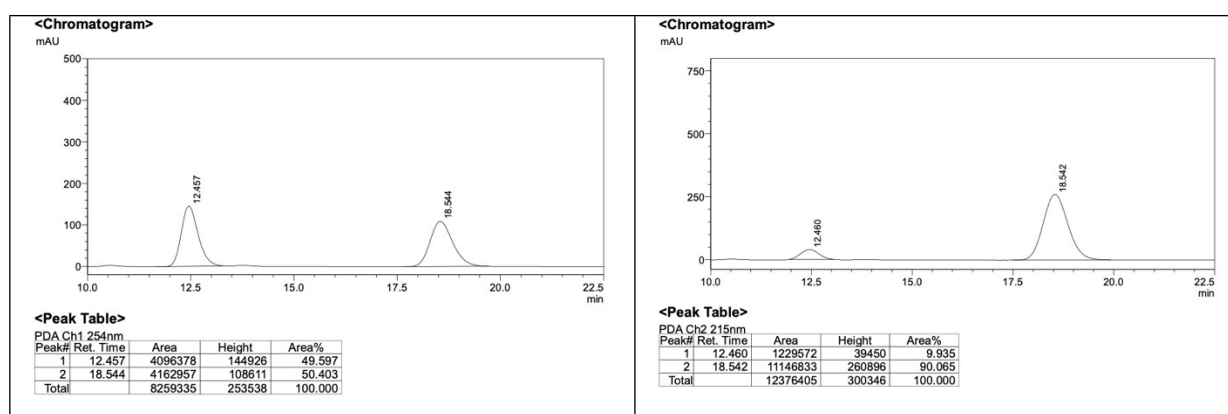

**(2*R*,3*S*,4*R*,5*S*)-Ethyl-4-benzoyl-3,5-bis(4-chlorophenyl)pyrrolidine-2-carboxylate (3c)**

White solid, Yield = 74% (52 mg); m.p.= 164 – 165 °C, R<sub>f</sub> = 0.46 (cyclohexane/ethyl acetate, 3:1),

$[\alpha]_D^{20} = +74.92$  (c = 0.47, CHCl<sub>3</sub>), (*endo/exo* = >99:1), 85:15 er; **<sup>1</sup>H NMR (500 MHz, CDCl<sub>3</sub>)** δ 7.57 – 7.56 (m, 2H), 7.47 – 7.44 (m, 1H), 7.32 – 7.28 (m, 6H), 7.04 – 7.02 (m, 4H), 4.97 (d, *J* = 8.9 Hz, 1H), 4.48 (t, *J* = 8.6 Hz, 1H), 4.25 (dq, *J* = 10.7, 7.1 Hz, 1H), 4.18 – 4.12 (m, 1H), 4.11 – 4.05 (m, 2H), 2.95 (s, 1H), 1.18 (t, *J* = 7.1 Hz, 3H). **<sup>13</sup>C NMR (126 MHz, CDCl<sub>3</sub>)** δ 197.6, 172.6, 138.5, 138.1, 137.2, 133.5, 133.2, 132.9, 129.2, 128.9, 128.8, 128.5, 128.3, 128.0, 67.2, 65.5, 60.5, 51.4, 14.1. **FT-IR (neat, cm<sup>-1</sup>):** 2930.3, 1738.9, 1672.0, 1488.3,

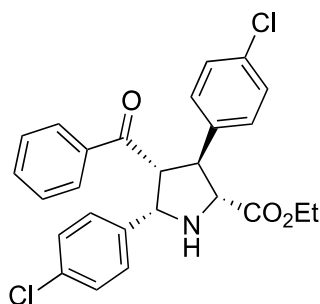

1255.6, 1178.3, 756.4. **HRMS: (ESI-TOF)** calculated for  $C_{26}H_{24}Cl_2NO_3$   $[M+H]^+$  468.1128, found 468.1124.

**HPLC analysis:** CHIRALPAK IC, heptane/2-propanol (90/10, 0.5 mL/min),  $\lambda = 254$  nm,  $t_R = 6.941$  min (minor), 8.707 min (minor).

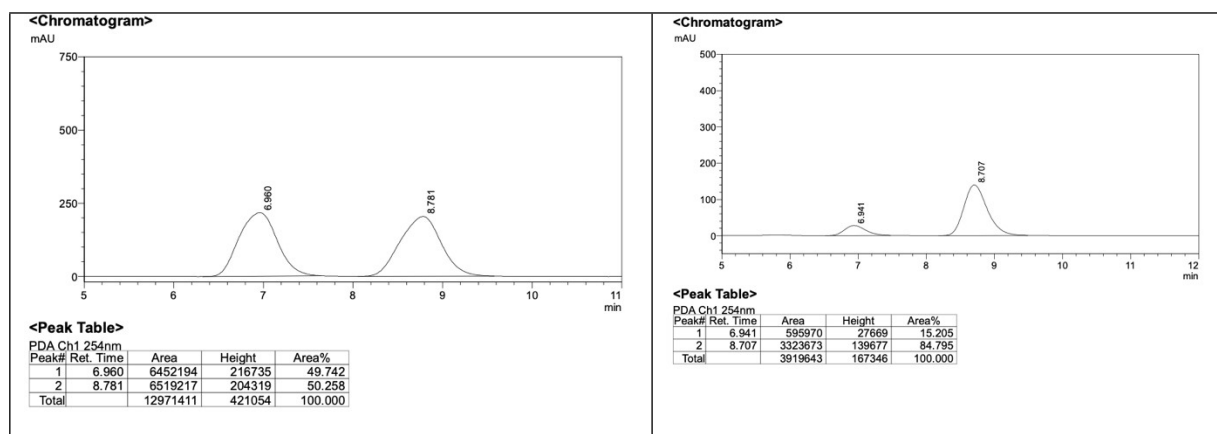

**(2R,3S,4R,5S)- Ethyl-4-benzoyl-3-(3-bromophenyl)-5-(4-chlorophenyl)pyrrolidine-2-carboxylate (3e)**

White solid, yield = 74% (57 mg); m.p. = 116 – 117 °C,  $R_f = 0.30$  (cyclohexane/ethyl acetate, 3:1),

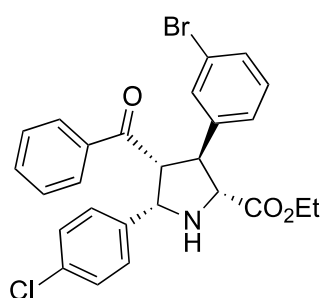

$[\alpha]_D^{20} = +89.65$  ( $c = 0.47$ ,  $CHCl_3$ ), (*endo/exo* = >99:1), 88:12 er;  **$^1H$  NMR (400 MHz,  $CDCl_3$ )**  $\delta$  8.19 (d,  $J = 8.8$  Hz, 2H), 7.59 – 7.55 (m, 4H), 7.50 – 7.46 (m, 1H), 7.35 – 7.31 (m, 2H), 7.08 – 7.01 (m, 4H), 5.03 (d,  $J = 9.4$  Hz, 1H), 4.54 (t,  $J = 9.0$  Hz, 1H), 4.28 – 4.11 (m, 4H), 1.16 (t,  $J = 7.1$  Hz, 3H).  **$^{13}C$  NMR (101 MHz,  $CDCl_3$ )**  $\delta$  197.7, 172.7, 142.7, 138.1, 137.3, 133.6, 133.3, 131.1, 130.5, 130.4, 129.0, 128.6, 128.4, 128.2, 126.8, 122.9, 67.4, 65.7, 61.5, 60.4, 51.7, 14.3. **FT-IR (neat,  $cm^{-1}$ ):** 2951.9, 2920.8, 1733.8, 1675.0, 1210.9, 1188.5, 785.0. **HRMS: (ESI-TOF)** calculated for  $C_{26}H_{24}BrClNO_3$   $[M+H]^+$  514.0603, found 514.0600.

**HPLC analysis:** CHIRALPAK IC, heptane/2-propanol (90/10, 0.5 mL/min),  $\lambda = 254$  nm,  $t_R = 7.348$  min (minor), 10.212 min (major).

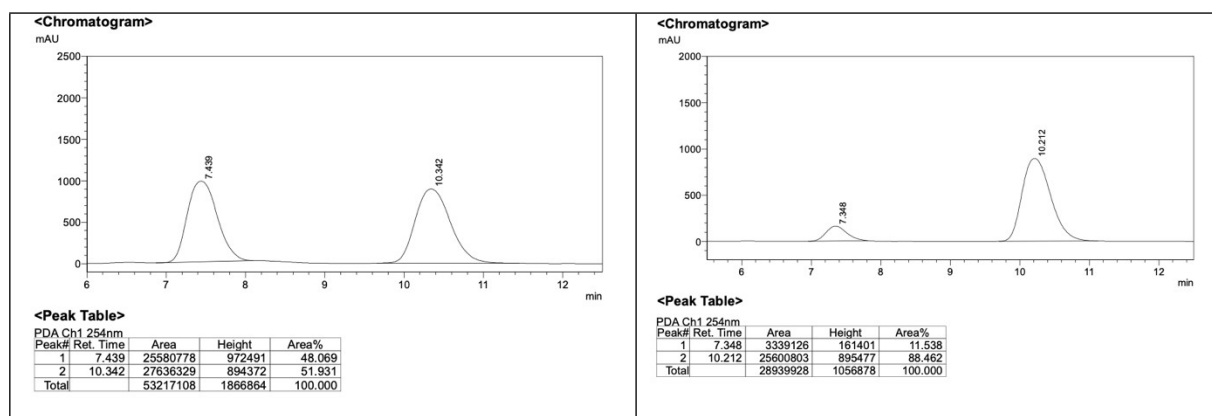

**(2*R*,3*S*,4*R*,5*S*)-Ethyl-4-benzoyl-5-(4-chlorophenyl)-3-(naphthalen-1-yl)pyrrolidine-2-carboxylate (3f)**

White solid, yield = 94% (68.1 mg); mp.= 120 – 121 °C, Rf = 0.46 (cyclohexane/ethyl acetate, 3:1),

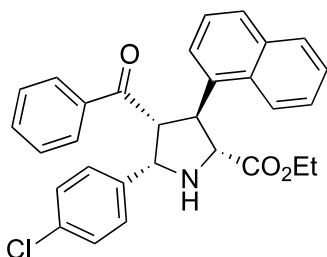

$[\alpha]_D^{20} = +3.27$  ( $c = 1$ ,  $\text{CHCl}_3$ ), (*endo/exo* = >99:1), 94:6 er;  $^1\text{H NMR}$  (400 MHz,  $\text{CDCl}_3$ )  $\delta$  8.19 – 8.16 (m, 1H), 7.87 – 7.85 (m, 1H), 7.79 (d,  $J = 8.2$  Hz, 1H), 7.68 (dd,  $J = 7.2, 1.3$  Hz, 1H), 7.53 – 7.45 (m, 4H), 7.41 – 7.36 (m, 1H), 7.23 – 7.20 (m, 2H), 7.10 – 7.13 (m, 2H), 7.07 – 7.03 (m, 2H), 5.04 – 5.00 (m, 2H), 4.59 (dd,  $J = 8.5, 6.7$  Hz, 1H), 4.31

(d,  $J = 7.8$  Hz, 1H), 4.16 – 4.04 (m, 2H), 0.93 (t,  $J = 7.2$  Hz, 3H).  $^{13}\text{C NMR}$  (101 MHz,  $\text{CDCl}_3$ )  $\delta$  199.4, 173.5, 137.6, 137.4, 134.1, 133.5, 133.1, 132.2, 129.0, 128.9, 128.44, 128.42, 128.2, 127.9, 126.5, 125.9, 125.6, 123.4, 67.9, 66.3, 61.5, 60.5, 13.9. FT-IR (neat,  $\text{cm}^{-1}$ ): 2974.1, 2957.7, 1727.9, 1672.7, 1212.9, 1190.6, 776.8. HRMS: (ESI-TOF) calculated for  $\text{C}_{30}\text{H}_{26}\text{ClNO}_3$   $[\text{M}+\text{H}]^+$  484.1674, found 484.1673.

**HPLC analysis:** CHIRALPAK IC, heptane/2-propanol (90/10, 0.5 mL/min),  $\lambda = 254$  nm,  $t_R = 9.675$  min (minor), 22.993 min (major).

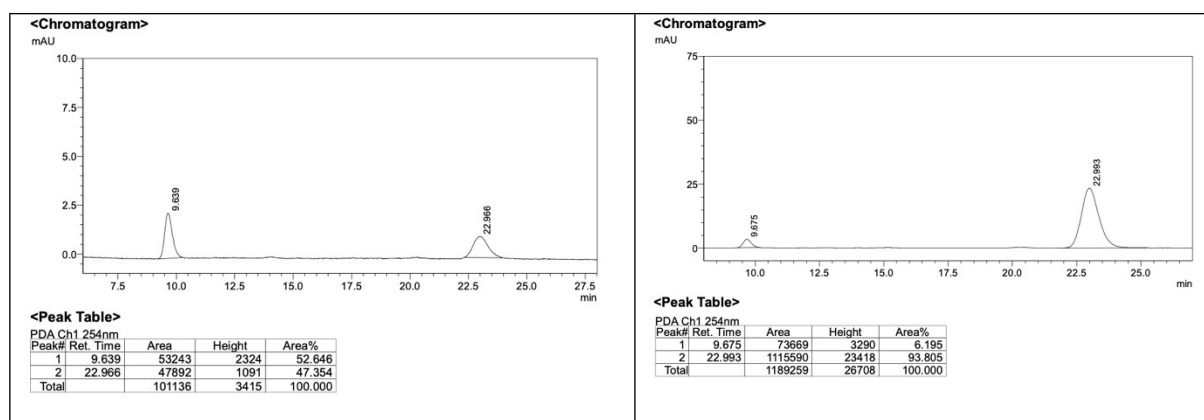

**(2*R*,3*S*,4*R*,5*S*)- Ethyl-4-benzoyl-5-(4-chlorophenyl)-3-(thiophen-3-yl)pyrrolidine-2-carboxylate (3g)**

White solid, yield = 50% (33 mg); m.p.= 105 – 106 °C, Rf = 0.46 (cyclohexane/ethyl acetate, 3:1),

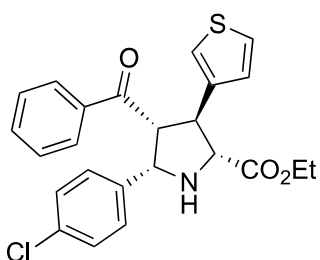

$[\alpha]_D^{20} = +3.27$  ( $c = 1$ ,  $\text{CHCl}_3$ ), (*endo/exo* = >99:1), 91:9 er;  $^1\text{H NMR}$  (400 MHz,  $\text{CDCl}_3$ )  $\delta$  7.59 (dd,  $J = 8.4, 1.4$  Hz, 2H), 7.48 – 7.43 (m, 1H), 7.33 – 7.28 (m, 3H), 7.18 (ddd,  $J = 3.0, 1.4, 0.6$  Hz, 1H), 7.09 (dd,  $J = 5.0, 1.4$  Hz, 1H), 7.05 (s, 4H), 4.92 (d,  $J = 8.7$  Hz, 1H), 4.46 (t,  $J = 8.5$  Hz, 1H), 4.32 – 4.18 (m, 3H), 4.14 (d,  $J = 9.1$  Hz, 1H), 1.23 (t,  $J = 7.1, 3\text{H}$ ).  $^{13}\text{C NMR}$  (101 MHz,  $\text{CDCl}_3$ )  $\delta$  198.3, 172.9, 140.9, 138.1, 137.4, 133.5, 133.2, 128.9, 128.6, 128.4,

128.2, 126.7, 126.3, 121.7, 67.0, 65.5, 61.5, 60.0, 47.6, 14.3. **FT-IR (neat,  $\text{cm}^{-1}$ ):** 2362.9, 1733.4, 1674.8, 1210.3, 1188.6, 722.2. **HRMS: (ESI-TOF)** calculated for  $\text{C}_{24}\text{H}_{23}\text{ClNO}_3\text{S}$   $[\text{M}+\text{H}]^+$  440.1082, found 440.1080

**HPLC analysis:** CHIRALPAK IC, heptane/2-propanol (90/10, 0.5 mL/min),  $\lambda = 254$  nm,  $t_R = 10.412$  min (minor), 14.429 min (major).

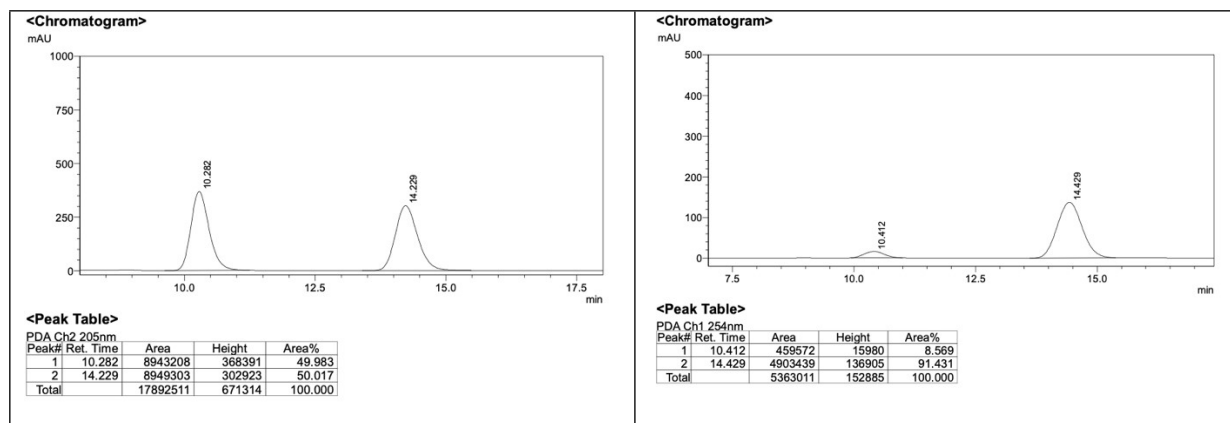

### (2*R*,3*R*,4*R*,5*S*)-Ethyl-4-benzoyl-5-(4-chlorophenyl)-3-methylpyrrolidine-2-carboxylate (**3h**)

White solid, yield = 35% (19.5 mg); m.p. = 85 – 86 °C,  $R_f = 0.40$  (cyclohexane/ethyl acetate, 3:1),

$[\alpha]_D^{20} = +108.70$  ( $c = 0.65$ ,  $\text{CHCl}_3$ ), (*endo/exo* = >99:1), 87:13 er;  **$^1\text{H}$**

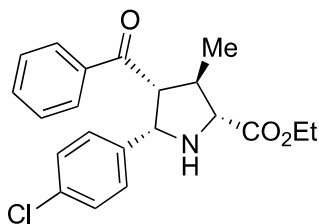

**NMR (400 MHz,  $\text{CDCl}_3$ )**  $\delta$  7.69 – 7.66 (m, 2H), 7.50 (ddt,  $J = 7.8, 6.8, 1.3$  Hz, 1H), 7.39 – 7.35 (m, 2H), 7.04 – 7.01 (m, 2H), 6.97 – 6.94 (m, 2H), 4.77 (d,  $J = 8.9$  Hz, 1H), 4.38 – 4.25 (m, 2H), 3.99 (t,  $J = 8.9$  Hz, 1H), 3.62 (d,  $J = 9.4$  Hz, 1H), 2.98 – 2.88 (m, 1H), 2.81 (s, 1H), 1.36 (t,

$J = 7.1$  Hz, 3H), 1.25 (d,  $J = 6.6$  Hz, 3H).  **$^{13}\text{C}$  NMR (101 MHz,  $\text{CDCl}_3$ )**  $\delta$  198.4, 173.7, 139.0,

137.7, 133.3, 133.2, 128.8, 128.7, 128.3, 128.2, 67.1, 65.0, 61.4, 60.3, 41.1, 17.5, 14.4. **FT-IR**

(neat,  $\text{cm}^{-1}$ ): 2986.1, 2956.9, 1736.8, 1671.7, 1252.7, 1196.5, 686.5. **HRMS: (ESI-TOF)**

calculated for  $\text{C}_{21}\text{H}_{23}\text{ClNO}_3$   $[\text{M}+\text{H}]^+$  372.1361, found 372.1366.

**HPLC analysis:** CHIRALPAK IC, heptane/2-propanol (90/10, 0.5 mL/min),  $\lambda = 254$  nm,  $t_R = 9.498$  min (minor), 10.990 min (major).

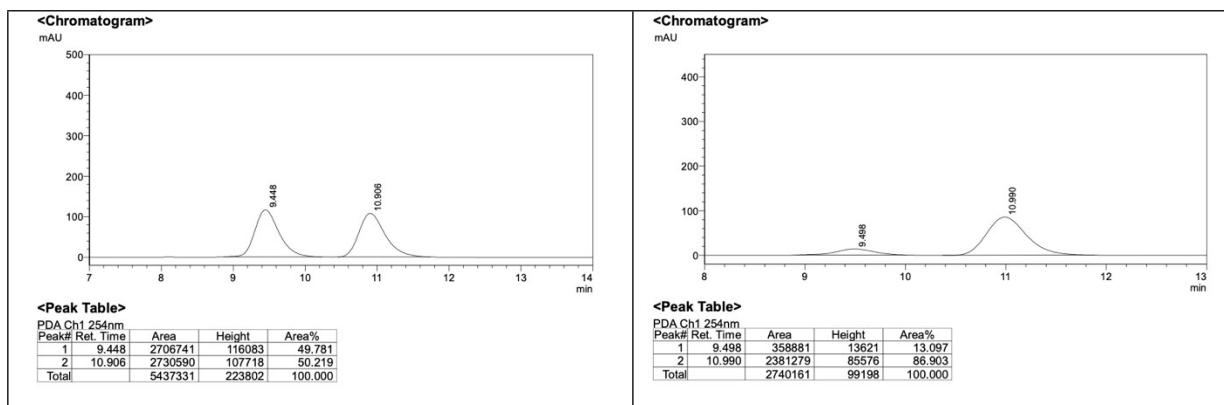

**(2*R*,3*S*,4*R*,5*S*)-Ethyl-5-(4-chlorophenyl)-4-(4-fluorobenzoyl)-3-phenylpyrrolidine-2-carboxylate (3i)**

White solid, yield = 60% (37.8 mg); m.p. = 125 – 126 °C, *R*<sub>f</sub> = 0.50 (cyclohexane/ethyl acetate, 3:1),

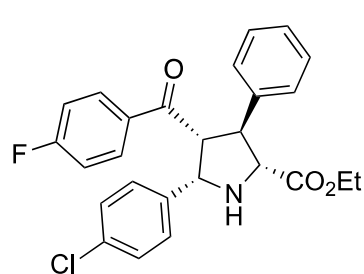

$[\alpha]_D^{20} = +0.58$  (*c* = 1, CHCl<sub>3</sub>), (*endo/exo* = >99:1), 88:12 *er*; <sup>1</sup>H NMR (400 MHz, CDCl<sub>3</sub>) δ 7.61 – 7.56 (m, 2H), 7.38 – 7.31 (m, 4H), 7.27 – 7.22 (m, 1H), 7.05 – 7.10 (m, 4H), 6.99 – 6.93 (m, 2H), 4.96 (d, *J* = 8.8 Hz, 1H), 4.46 (dd, *J* = 8.8, 7.9 Hz, 1H), 4.26 (dq, *J* = 10.8, 7.1 Hz, 1H), 4.19 – 4.05 (m, 3H), 3.00 (s, 1H), 1.17 (t, *J* = 7.1 Hz, 3H). <sup>13</sup>C NMR (101 MHz, CDCl<sub>3</sub>) δ 196.8, 172.9, 165.7 (d, *J* = 255.6 Hz),

140.4, 138.0, 133.9 (d, *J* = 3.1 Hz), 133.6, 130.8 (d, *J* = 9.5 Hz), 128.93, 128.92, 128.5, 127.9, 127.4, 115.7 (d, *J* = 21.7 Hz), 67.7, 65.9, 61.4, 60.5, 52.7, 14.3. <sup>19</sup>F NMR (376 MHz, CDCl<sub>3</sub>) δ -104.8. FT-IR (neat, cm<sup>-1</sup>): 2925.0, 2907.3, 1718.7, 1675.8, 1224.8, 1172.6, 755.0. HRMS: (ESI-TOF) calculated for C<sub>26</sub>H<sub>24</sub>ClFNO<sub>3</sub> [M+H]<sup>+</sup> 452.1423, found 452.1424.

**HPLC analysis:** CHIRALPAK IC, heptane/2-propanol (90/10, 0.5 mL/min), λ = 254 nm, *t*<sub>R</sub> = 9.974 min (minor), 14.659 min (major).

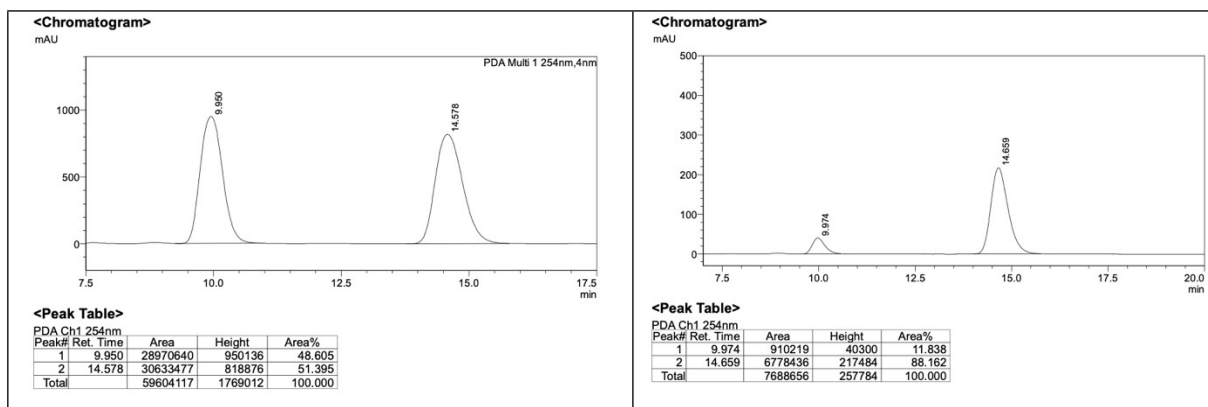



**(2R,3S,4R,5S)-Ethyl-4-(2-naphthoyl)-5-(4-chlorophenyl)-3-phenylpyrrolidine-2-carboxylate (3j)**

White solid, yield = 92% (68.1 mg); m.p.= 166 – 167 °C, Rf = 0.47 (cyclohexane/ethyl acetate, 3:1),

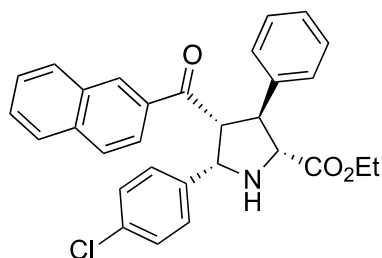

$[\alpha]_D^{20} = +122.35$  ( $c = 1$ ,  $\text{CHCl}_3$ ), (*endo/exo* = >99:1), 83:17 er;  $^1\text{H NMR}$  (400 MHz,  $\text{CDCl}_3$ )  $\delta$  8.14 (d,  $J = 2.0$  Hz, 1H), 7.86 (dd,  $J = 8.3, 1.1$  Hz, 1H), 7.80 (d,  $J = 8.2$  Hz, 1H), 7.72 (d,  $J = 9.1$  Hz, 1H), 7.61 – 7.50 (m, 3H), 7.42 – 7.39 (m, 2H), 7.34 (ddd,  $J = 7.8, 6.9, 1.2$  Hz, 2H), 7.25 – 7.22 (m, 1H), 7.09 – 7.06 (m, 2H), 7.03 – 6.99 (m, 2H), 5.06 (d,  $J = 8.6$  Hz, 1H), 4.71 (t,  $J = 8.5$  Hz, 1H), 4.27 (dq,  $J =$

10.7, 7.2 Hz, 1H), 4.20 – 4.11 (m, 3H), 3.04 (brs, 1H), 1.18 (t,  $J = 7.1$  Hz, 3H).  $^{13}\text{C NMR}$  (101 MHz,  $\text{CDCl}_3$ )  $\delta$  198.1, 173.1, 140.4, 138.4, 135.6, 134.9, 133.5, 132.4, 129.9, 129.6, 128.91, 128.90, 128.7, 128.5, 128.4, 128.0, 127.9, 127.4, 126.9, 123.9, 67.7, 66.0, 61.4, 60.6, 52.6, 14.3. FT-IR (neat,  $\text{cm}^{-1}$ ): 2968.2, 2952.5, 1729.6, 1669.1, 1177.8, 1158.8, 745.3. HRMS: (ESI-TOF) calculated for  $\text{C}_{30}\text{H}_{27}\text{ClNO}_3$   $[\text{M}+\text{H}]^+$  484.1674, found 484.1673.

**HPLC analysis:** CHIRALPAK IC, heptane/2-propanol (90/10, 0.5 mL/min),  $\lambda = 254$  nm,  $t_R = 12.423$  min (minor), 19.014 min (major).

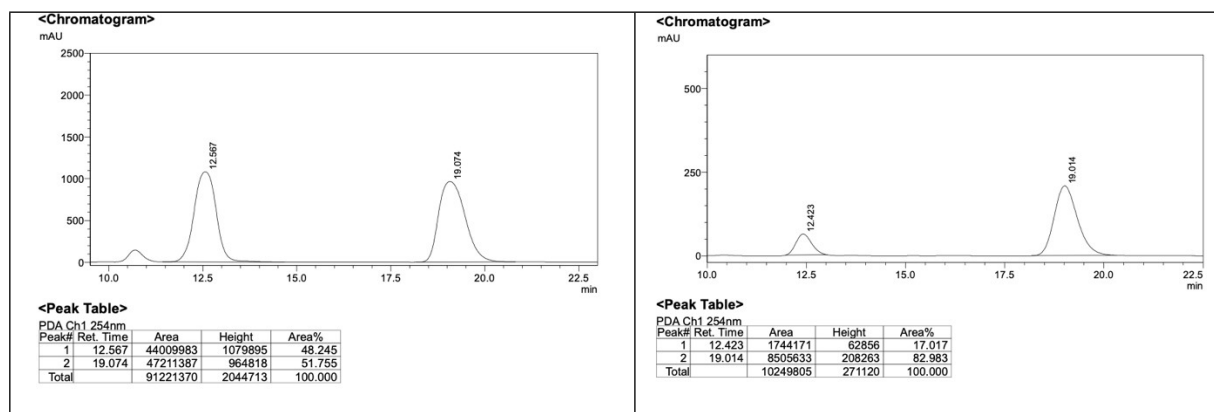

**(2R,3S,4R,5S)-Ethyl-4-acetyl-5-(4-chlorophenyl)-3-phenylpyrrolidine-2-carboxylate (3k)**

White solid, yield = 21 % (12 mg); m.p.= 104 – 105 °C, Rf = 0.48 (cyclohexane/ethyl acetate, 3:1),

$[\alpha]_D^{20} = +21.63$  ( $c = 0.65$ ,  $\text{CHCl}_3$ ), (*endo/exo* = >99:1), 82:18 er;  $^1\text{H NMR}$  (500 MHz,  $\text{CDCl}_3$ )  $\delta$  7.35 – 7.26 (m, 8H), 7.26 – 7.24 (m, 1H), 4.85 (d,  $J = 8.7$  Hz, 1H), 4.24 (dq,  $J = 10.8, 7.1$  Hz, 1H), 4.14 (dq,  $J = 10.8, 7.2$  Hz, 1H), 3.99 (d,  $J = 8.7$  Hz, 1H), 3.89 (dd,  $J = 8.7, 7.5$  Hz, 1H), 3.64 (dd,  $J = 8.9, 7.4$  Hz, 1H), 2.85 (s, 1H), 1.60 (s, 3H), 1.18 (t,  $J = 7.2$  Hz, 3H).  $^{13}\text{C NMR}$  (126 MHz,  $\text{CDCl}_3$ )  $\delta$  207.2, 172.7, 140.8, 138.0, 134.0, 129.0, 128.9, 128.88, 127.9, 127.3, 67.9, 65.8, 65.0, 61.4, 52.1, 31.6, 14.3. FT-IR (neat,  $\text{cm}^{-1}$ ):

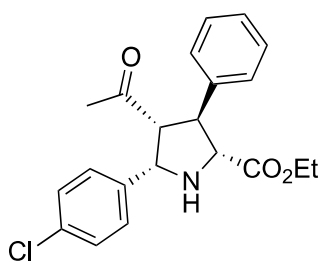



2975.0, 2915.3, 1729.8, 1162.5, 1120.3, 765.6. **HRMS: (ESI-TOF)** calculated for  $C_{21}H_{23}ClNO_3$   $[M+H]^+$  372.1361, found 372.1365.

**HPLC analysis:** CHIRALPAK IC, heptane/2-propanol (90/10, 0.5 mL/min),  $\lambda = 254$  nm,  $t_R = 16.606$  min (major), 20.732 min (minor).

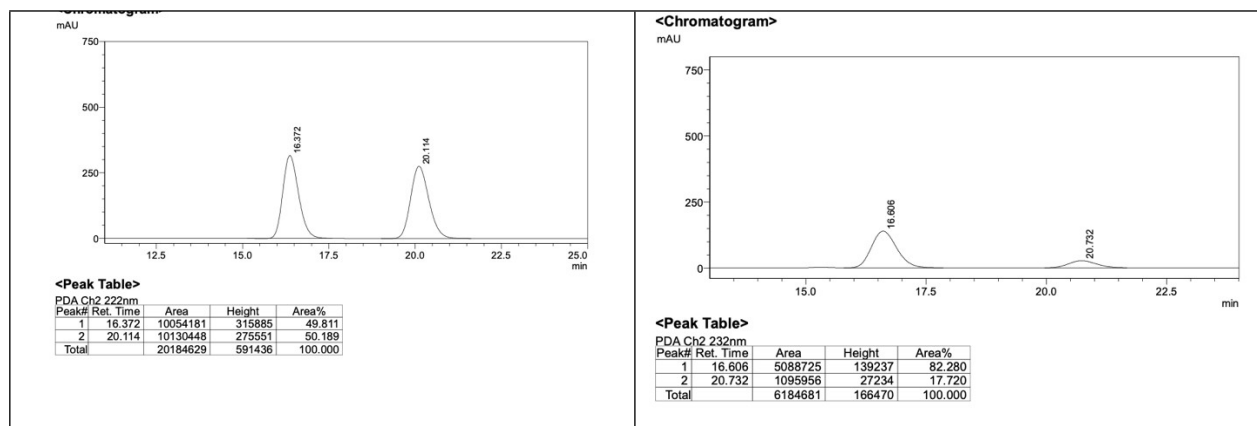

**(2R,3S,4R,5S)-Methyl-4-benzoyl-5-(4-chlorophenyl)-3-phenylpyrrolidine-2-carboxylate (3l)<sup>1</sup>**

White solid, yield = 91% (57.5 mg); m.p. = 164 – 166 °C,  $R_f = 0.46$  (cyclohexane/ethyl acetate, 3:1),  $[\alpha]_D^{20} = +84.14$  ( $c = 1$ ,  $CHCl_3$ ), (*endo/exo* = >99:1), 94:6 er; **<sup>1</sup>H NMR (400 MHz,  $CDCl_3$ )**  $\delta$  7.60 – 7.54 (m, 2H), 7.43 (t,  $J = 7.4$  Hz, 1H), 7.38 – 7.33 (m, 4H), 7.32 – 7.28 (m, 2H), 7.24 – 7.23 (m, 1H),

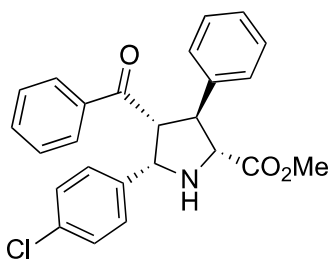

7.06 (s, 4H), 4.97 (d,  $J = 8.7$  Hz, 1H), 4.51 (t,  $J = 8.3$  Hz, 1H), 4.18 (d,  $J = 9.0$  Hz, 1H), 4.10 (t,  $J = 8.7$  Hz, 1H), 3.74 (s, 3H). **<sup>13</sup>C NMR (101 MHz,  $CDCl_3$ )**  $\delta$  198.5, 173.5, 140.5, 138.0, 137.5, 133.5, 133.2, 129.6, 130.0, 128.9, 128.5, 128.4, 128.2, 127.9, 127.4, 67.7, 65.9, 60.5, 52.5.

**FT-IR (neat,  $cm^{-1}$ ):** 2921.2, 2851.8, 1732.0, 1673.9, 1211.9, 1179.8, 757.1. **HRMS: (ESI-TOF)** calculated for  $C_{25}H_{23}ClNO_3$   $[M+H]^+$

420.1361, found 420.1361.

**HPLC analysis:** CHIRALPAK IC, heptane/2-propanol (50/50, 0.5 mL/min),  $\lambda = 254$  nm,  $t_R = 5.493$  (minor), 6.359 (major).

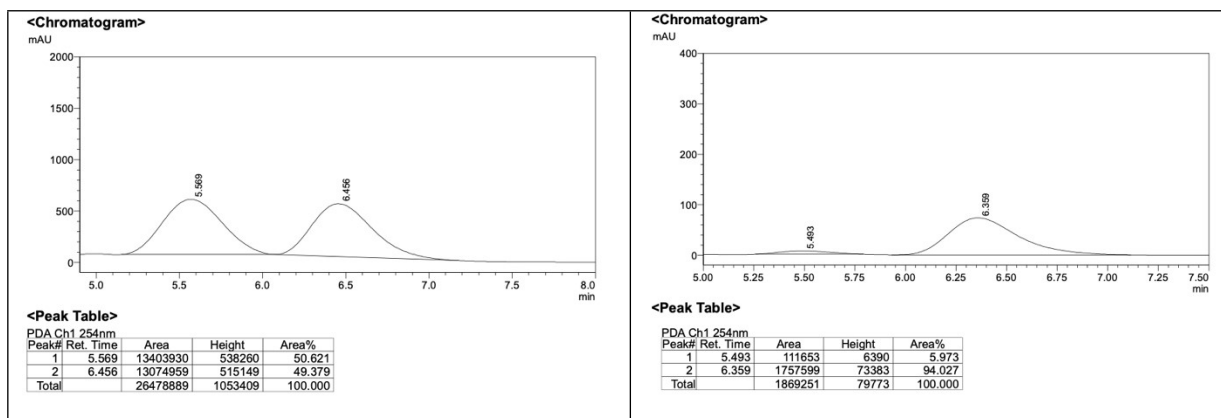

**(2*R*,3*S*,4*R*,5*S*)-Ethyl-4-benzoyl-5-(4-fluorophenyl)-3-phenylpyrrolidine-2-carboxylate (3*m*)<sup>2</sup>**

White solid, yield = 77% (48.1 mg); m.p.= 149–150 °C, R<sub>f</sub> = 0.33 (cyclohexane/ethyl acetate, 3:1),

[α]<sub>D</sub><sup>20</sup> = +59.86 (c = 1, CHCl<sub>3</sub>), (*endo/exo* = >99:1), 93:7 er; <sup>1</sup>H NMR (400 MHz, CDCl<sub>3</sub>) δ 7.57–

7.54 (m, 2H), 7.44–7.21 (m, 8H), 7.12–7.07 (m, 2H), 6.80–6.74 (m,

2H), 4.99 (d, *J* = 8.7 Hz, 1H), 4.52 (dd, *J* = 9.1, 7.8 Hz, 1H), 4.26 (dq, *J* =

10.8, 7.1 Hz, 1H), 4.17–4.08 (m, 3H), 2.98 (s, 1H), 1.17 (t, *J* = 7.1 Hz,

3H). <sup>13</sup>C NMR (101 MHz, CDCl<sub>3</sub>) δ 198.4, 173.1, 162.2 (d, <sup>1</sup>*J*<sub>C-F</sub> = 246.4

Hz), 140.5, 137.5, 135.4 (d, <sup>4</sup>*J*<sub>C-F</sub> = 3.4 Hz), 133.1, 129.3 (d, <sup>3</sup>*J*<sub>C-F</sub> = 8.4

Hz), 128.9, 128.5, 128.2, 128.0, 127.3, 115.1 (d, <sup>2</sup>*J*<sub>C-F</sub> = 21.4 Hz), 67.7,

65.9, 61.4, 60.7, 52.6, 14.3. <sup>19</sup>F NMR (376 MHz, CDCl<sub>3</sub>) δ -114.7. FT-IR (neat, cm<sup>-1</sup>): 2934.1,

2909.5, 1733.3, 1673.0, 1177.4, 1157.6, 766.9. HRMS: (ESI-TOF) calculated for C<sub>26</sub>H<sub>25</sub>FNO<sub>3</sub>

[M+H]<sup>+</sup> 418.1813, found 418.1812.

**HPLC analysis:** CHIRALPAK IC, heptane/2-propanol (90/10, 0.5 mL/min), λ = 254 nm, t<sub>R</sub> = 11.038

(minor), 3.683 (major).

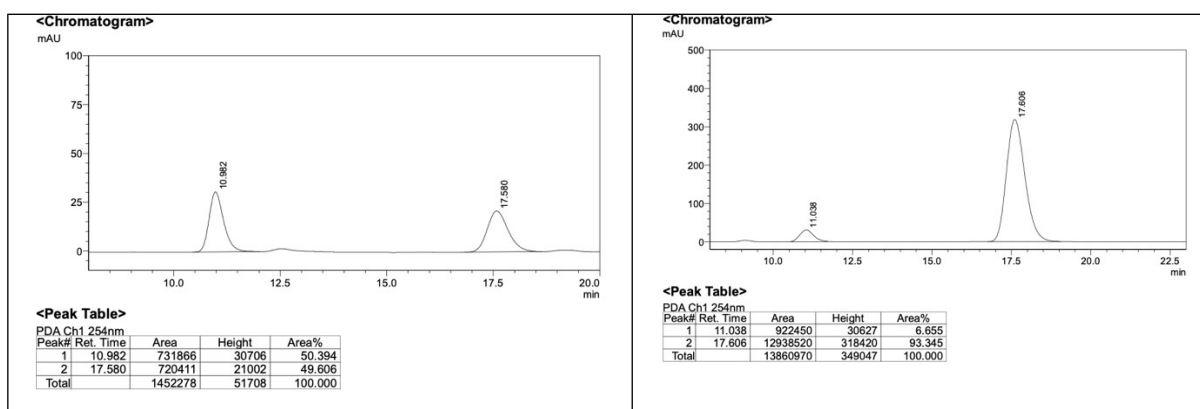

**(2R,3S,4R,5S)- Ethyl-4-benzoyl-5-(4-methoxyphenyl)-3-phenylpyrrolidine-2-carboxylate (3n)<sup>2</sup>**

White solid, yield = 79% (50.8 mg); m.p.= 142 –143 °C, R<sub>f</sub> = 0.28 (cyclohexane/ethyl acetate, 3:1),

[α]<sub>D</sub><sup>20</sup> = +59.02 (c = 1.05, CHCl<sub>3</sub>), (*endo/exo* = >99:1), 86:14 er; <sup>1</sup>H NMR (400 MHz, CDCl<sub>3</sub>) δ

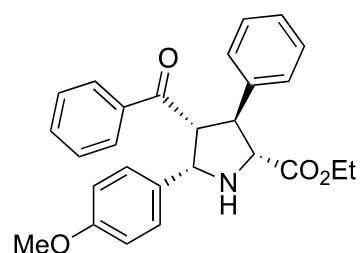

7.58 – 7.55 (m, 2H), 7.40 (ddt, *J* = 13.8, 6.8, 1.3 Hz, 3H), 7.34 – 7.21 (m, 5H), 7.50 – 7.00 (m, 2H), 6.64 – 6.60 (m, 2H), 4.97 (d, *J* = 9.2 Hz, 1H), 4.51 (ddd, *J* = 8.8, 6.6, 1.8 Hz, 1H), 4.26 (dq, *J* = 10.8, 7.1 Hz, 1H), 4.18 – 4.07 (m, 3H), 3.68 (s, 3H), 2.98 (s, 1H) 1.16 (t, *J* = 7.1 Hz, 3H). <sup>13</sup>C NMR (101 MHz, CDCl<sub>3</sub>) δ 198.6, 173.1, 159.0, 140.7, 137.6,

132.9, 131.6, 128.82, 128.80, 128.76, 128.4, 128.2, 128.0, 127.2, 113.7, 67.8, 66.2, 61.3, 61.0, 55.3, 52.8, 14.3. FT-IR (neat, cm<sup>-1</sup>): 2924.1, 2906.4, 1729.1, 1670.1, 1261.9, 1205.9, 1177.1, 767.2.

HRMS: (ESI-TOF) calculated for C<sub>27</sub>H<sub>28</sub>NO<sub>4</sub> [M+H]<sup>+</sup> 430.2013, found 430.2015.

**HPLC analysis:** CHIRALPAK IC, heptane/2-propanol (90/10, 0.5 mL/min), λ = 254 nm, t<sub>R</sub> = 24.936 (minor), 41.723 (major).

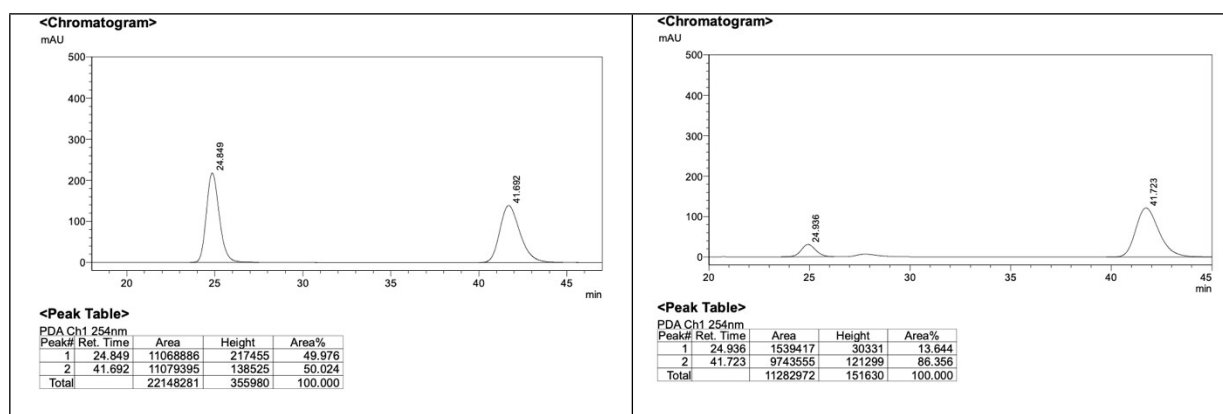**(2R,3S,4R,5S)-Ethyl-4-benzoyl-3,5-diphenylpyrrolidine-2-carboxylate (3o)<sup>2</sup>**

White solid, yield = 71% (42.4 mg); m.p.= 144 –145 °C, R<sub>f</sub> = 0.40 (cyclohexane/ethyl acetate, 3:1),

[α]<sub>D</sub><sup>20</sup> = +69.67 (c = 1.00, CHCl<sub>3</sub>), (*endo/exo* = >99:1), 91:9 er; <sup>1</sup>H NMR (400 MHz, CDCl<sub>3</sub>) δ 7.56

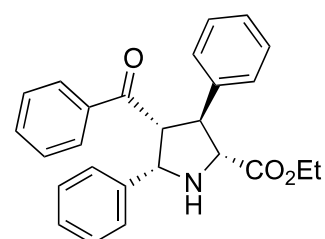

– 7.52 (m, 2H), 7.42 – 7.37 (m, 3H), 7.33 (ddd, *J* = 8.0, 6.9, 1.3 Hz, 2H), 7.27 – 7.22 (m, 3H), 7.13 – 7.06 (m, 5H), 5.00 (d, *J* = 8.8 Hz, 1H), 4.54 (dd, *J* = 8.9, 7.6 Hz, 1H), 4.27 (dq, *J* = 10.8, 7.1 Hz, 1H), 4.19 – 4.08 (m, 3H), 1.18 (t, *J* = 7.1 Hz, 3H). <sup>13</sup>C NMR (101 MHz, CDCl<sub>3</sub>) δ 198.6, 173.0, 140.8, 139.3, 137.6, 132.9, 128.8, 128.4, 128.3, 128.2, 128.00,

127.8, 127.6, 127.2, 67.9, 66.8, 61.4, 60.8, 53.0, 14.3. FT-IR (neat, cm<sup>-1</sup>): 2973.6, 2913.9, 1723.6, 1669.4, 1210.6, 1179.9, 1160.7, 766.6. HRMS: (ESI-TOF) calculated for C<sub>26</sub>H<sub>26</sub>NO<sub>3</sub> [M+H]<sup>+</sup> 400.1907, found 400.1907.

**HPLC analysis:** CHIRALPAK IC, heptane/2-propanol (90/10, 0.5 mL/min),  $\lambda = 254$  nm,  $t_R = 15.124$  (minor), 23.513 (major).

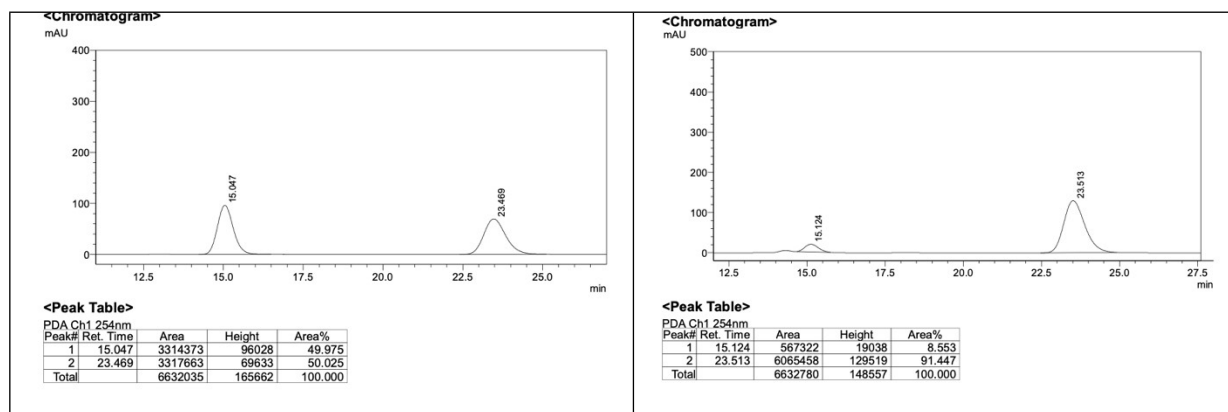

**(2R,3S,4R,5S)-Ethyl-4-benzoyl-5-(3-bromophenyl)-3-phenylpyrrolidine-2-carboxylate (3p)**

White solid, yield = 84% (60.2 mg); m.p.= 130 –131 °C,  $R_f = 0.44$  (cyclohexane/ethyl acetate, 3:1),

$[\alpha]_D^{20} = +44.48$  ( $c = 1.00$ ,  $\text{CHCl}_3$ ), (*endo/exo* = >99:1), 94:6 er;  $^1\text{H NMR}$  (400 MHz,  $\text{CDCl}_3$ )  $\delta$  7.57

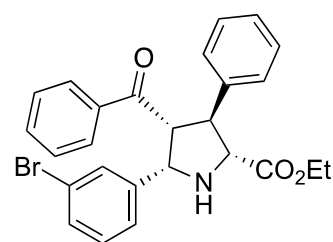

– 7.54 (m, 2H), 7.44 (ddt,  $J = 8.7, 6.9, 1.3$  Hz, 1H), 7.39 – 7.30 (m, 5H),

7.29 – 7.22 (m, 2H), 7.20 – 7.18 (m, 2H), 7.11 (dt,  $J = 7.5, 1.7$  Hz, 1H),

7.00 – 6.96 (m, 1H), 4.94 (d,  $J = 9.1$  Hz, 1H), 4.52 (dd,  $J = 8.8, 7.7$  Hz,

1H), 4.27 (dq,  $J = 10.8, 7.1$  Hz, 1H), 4.21 – 4.06 (m, 3H), 1.20 (t,  $J = 7.1$

Hz, 3H).  $^{13}\text{C NMR}$  (101 MHz,  $\text{CDCl}_3$ )  $\delta$  198.4, 172.9, 141.8, 140.6,

137.6, 133.2, 130.9, 130.8, 129.8, 128.92, 128.90, 128.6, 128.1, 128.0,

127.3, 125.9, 122.3, 67.8, 66.0, 61.4, 60.4, 52.4, 14.3. **FT-IR** (neat,  $\text{cm}^{-1}$ ): 1731.4, 1672.5, 1210.2,

1178.8, 1157.6, 770.9. **HRMS: (ESI-TOF)** calculated for  $\text{C}_{26}\text{H}_{24}\text{BrNO}_3\text{Na}$   $[\text{M}+\text{Na}]^+$  500.0832,

found 500.0832.

**HPLC analysis:** CHIRALPAK IC, heptane/2-propanol (90/10, 0.5 mL/min),  $\lambda = 254$  nm,  $t_R = 11.984$  (minor), 16.231 (major).

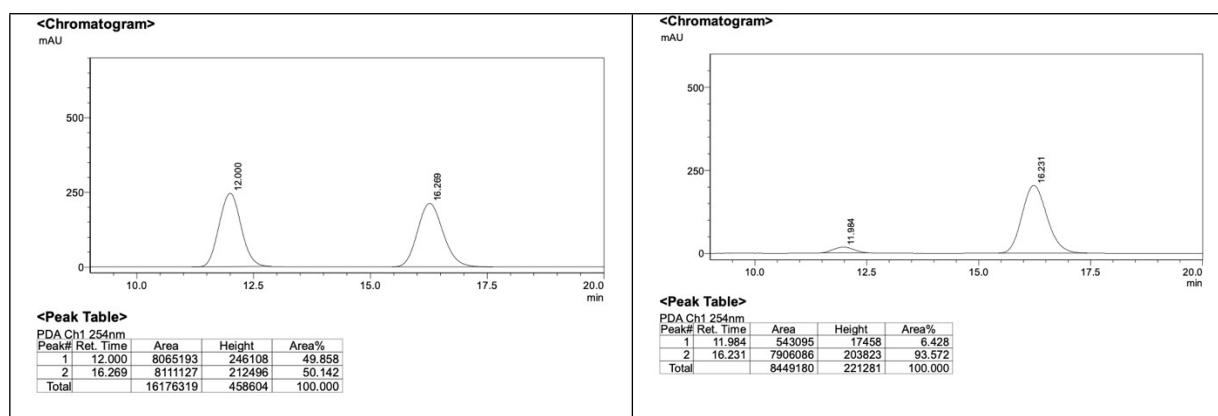

**(2R,3S,4R,5S)-Ethyl-4-benzoyl-3-phenyl-5-(*o*-tolyl)pyrrolidine-2-carboxylate (3q)**

White solid, yield = 54% (33.7 mg); m.p.= 156 –157 °C, R<sub>f</sub> = 0.44 (cyclohexane/ethyl acetate, 3:1), [α]<sub>D</sub><sup>20</sup> = +26.89 (c = 1.00, CHCl<sub>3</sub>), (*endo/exo* = >99:1), 84:16 er; <sup>1</sup>H NMR (400 MHz, CDCl<sub>3</sub>) δ 7.39 – 7.30 (m, 6H), 7.28 – 7.24 (m, 3H), 7.16 – 7.11 (m, 2H), 7.07 (tdd, *J* = 7.9, 1.5, 0.7 Hz, 1H), 6.92 (td, *J* = 7.4, 1.3 Hz, 1H), 6.74 (ddt, *J* = 7.5, 1.4, 0.6 Hz, 1H), 5.11 (d, *J* = 8.2 Hz, 1H), 4.48 (dd, *J* = 8.5, 5.9 Hz, 1H), 4.28 (dq, *J* = 10.8, 7.1 Hz, 1H), 4.21 – 4.05 (m, 3H), 3.15 (s, 1H), 2.12 (s, 3H), 1.20 (t, *J* = 7.1 Hz, 3H). <sup>13</sup>C NMR (101 MHz, CDCl<sub>3</sub>) δ 200.5, 172.5, 141.8, 137.9, 136.2, 135.0, 132.6, 130.0, 129.0, 128.1, 127.8, 127.6, 127.4, 127.2, 126.5, 126.3, 68.4, 62.9, 61.3, 59.7, 54.4, 19.7, 14.3. FT-IR (neat, cm<sup>-1</sup>): 2972.4, 2934.7, 1742.9, 1674.6, 1206.7, 1176.7, 763.9. HRMS: (ESI-TOF) calculated for C<sub>27</sub>H<sub>28</sub>NO<sub>3</sub> [M+H]<sup>+</sup> 414.2064, found 414.2063.

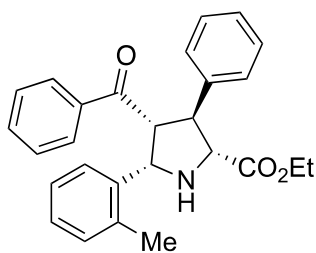

**HPLC analysis:** CHIRALPAK IC, heptane/2-propanol (90/10, 0.5 mL/min), λ = 254 nm, t<sub>R</sub> = 18.223 (minor), 23.465 (major).

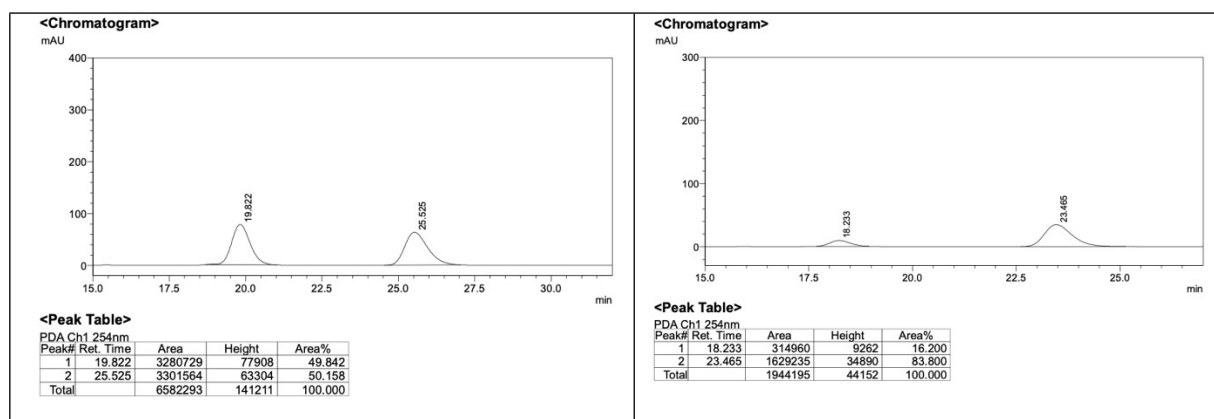**(2R,3S,4R,5S)-Ethyl-4-benzoyl-5-(naphthalen-1-yl)-3-phenylpyrrolidine-2-carboxylate (3r)<sup>2</sup>**

White solid, Yield = 72% (48.4 mg); m.p.= 147 –148 °C, R<sub>f</sub> = 0.48 (cyclohexane/ethyl acetate, 3:1), [α]<sub>D</sub><sup>20</sup> = -51.48 (c = 1.00, CHCl<sub>3</sub>), (*endo/exo* = >99:1), 12:88 er; <sup>1</sup>H NMR (400 MHz, CDCl<sub>3</sub>) δ 7.96 (d, *J* = 8.2 Hz, 1H), 7.61 – 7.58 (m, 1H), 7.52 – 7.38 (m, 7H), 7.34 – 7.28 (m, 3H), 7.12 – 7.09 (m, 2H), 7.05 – 6.99 (m, 1H), 6.80 – 6.77 (m, 2H), 5.73 (d, *J* = 7.7 Hz, 1H), 4.67 (dd, *J* = 7.8, 4.5 Hz, 1H), 4.35 (dq, *J* = 10.9, 7.2 Hz, 1H), 4.30 – 4.21 (m, 2H), 4.15 (dd, *J* = 7.7, 4.5 Hz, 1H), 3.48 (s, 1H), 1.28 (t, *J* = 7.1 Hz, 3H). <sup>13</sup>C NMR (101 MHz, CDCl<sub>3</sub>) δ 200.8, 172.5, 142.8, 136.9, 133.4, 133.2, 132.2, 131.0, 129.2, 129.0, 128.0, 127.9, 127.5, 127.4, 127.3, 126.1, 125.32, 125.30, 124.0, 122.7, 68.6, 63.1, 61.4, 59.8, 54.3, 14.4.

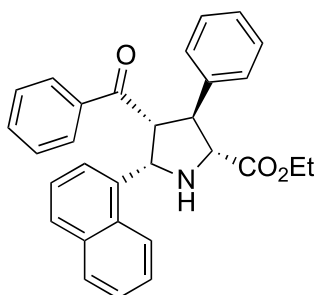

**FT-IR (neat,  $\text{cm}^{-1}$ ):** 2921.7, 2851.9, 1741.8, 1670.7, 1210.4, 1193.6, 1173.1, 757.1. **HRMS: (ESI-TOF)** calculated for  $\text{C}_{30}\text{H}_{28}\text{NO}_3$   $[\text{M}+\text{H}]^+$  450.2064, found 450.2064.

**HPLC analysis:** CHIRALPAK IC, heptane/2-propanol (90/10, 0.5 mL/min),  $\lambda = 254$  nm,  $t_R = 27.277$  min (major), 32.899 min (minor).

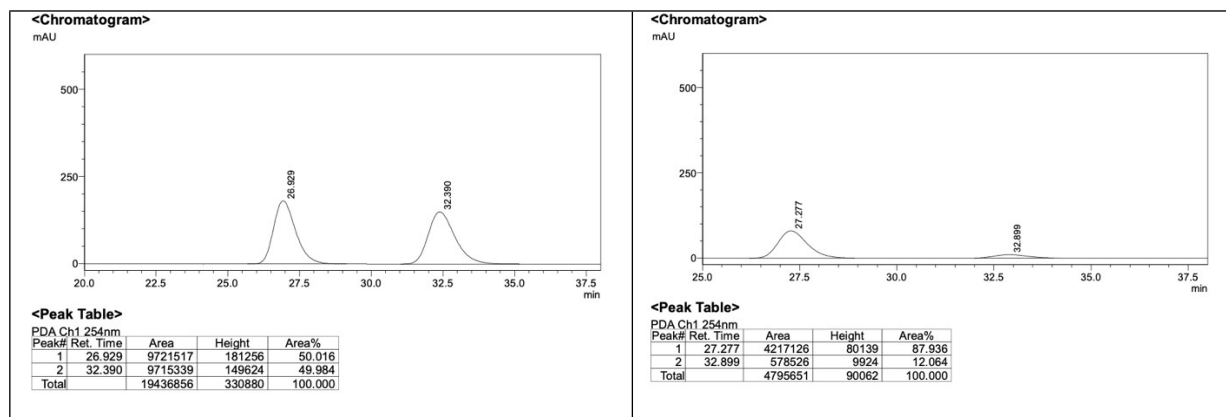

**(2*S*,3*R*,4*S*,5*R*)- Ethyl-4-benzoyl-5-(naphthalen-2-yl)-3-phenylpyrrolidine-2-carboxylate (3s)**

White solid, yield = 59% (40.0 mg); m.p. = 174–175 °C,  $R_f = 0.47$  (cyclohexane/ethyl acetate, 3:1),  $[\alpha]_D^{20} = +114.52$  ( $c = 1.00$ ,  $\text{CHCl}_3$ ), (*endo/exo* = >99:1), 90:10 er;  **$^1\text{H}$  NMR (400 MHz,  $\text{CDCl}_3$ )**  $\delta$  7.68–7.61 (m, 2H), 7.58–7.54 (m, 2H), 7.50–7.48 (m, 2H), 7.43–7.29 (m, 7H), 7.26–7.25 (m, 1H), 7.24–7.22 (m, 1H), 7.18–7.13 (m, 2H), 5.17 (d,  $J = 8.6$  Hz, 1H), 4.62 (dd,  $J = 9.0, 7.3$  Hz, 1H), 4.29 (dq,  $J = 10.8, 7.1$  Hz, 1H), 4.22–4.14 (m, 3H), 3.22 (s, 1H), 1.19 (t,  $J = 7.1$  Hz, 3H).  **$^{13}\text{C}$  NMR (101 MHz,  $\text{CDCl}_3$ )**  $\delta$  198.7, 173.0, 140.8, 137.6, 136.8, 133.0, 132.84, 132.82, 128.9, 128.3, 128.1, 128.0, 127.99, 127.98, 127.6, 127.2, 126.6, 126.1, 125.9, 125.4, 68.0, 66.9, 61.3, 60.8, 53.0, 14.3. **FT-IR (neat,  $\text{cm}^{-1}$ ):** 2925.3, 1724.7, 1671.0, 1208.0, 1178.9, 1123.9, 767.3. **HRMS: (ESI-TOF)** calculated for  $\text{C}_{30}\text{H}_{28}\text{NO}_3$   $[\text{M}+\text{H}]^+$  450.2064, found 450.2066.

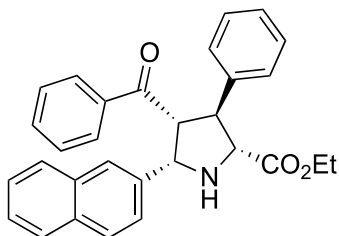

**HPLC analysis:** CHIRALPAK IC, heptane/2-propanol (90/10, 0.5 mL/min),  $\lambda = 254$  nm,  $t_R = 19.719$  min (minor), 24.330 min (major).

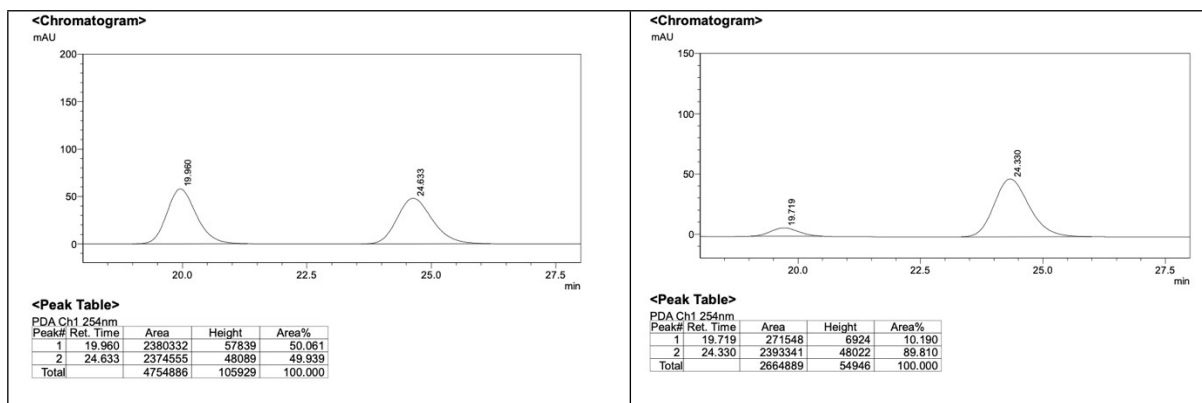

**(2*S*,3*R*,4*S*,5*R*)- Ethyl-4-benzoyl-5-(ferrocenyl)-3-phenylpyrrolidine-2-carboxylate (3t)**

Yellow solid, yield = 20% (15.2 mg); m.p. = 140 – 141 °C, R<sub>f</sub> = 0.48 (cyclohexane/ethyl acetate, 3:1),

$[\alpha]_D^{20} = +31.69$  (c = 0.26, CHCl<sub>3</sub>), (*endo/exo* = >99:1), 85:15 er; <sup>1</sup>H NMR (400 MHz, CDCl<sub>3</sub>) δ 7.72 – 7.70 (m, 2H), 7.52 – 7.64 (m, 1H), 7.39 – 7.33 (m, 4H), 7.29 – 7.26 (m, 2H), 7.20 – 7.16 (m, 1H), 4.73 (d, *J* = 8.4 Hz, 1H), 4.51 (dd, *J* = 10.7, 8.4 Hz, 1H), 4.39 (dd, *J* = 2.6, 1.4 Hz, 1H), 4.27 (dq, *J* = 10.8, 7.1 Hz, 1H), 4.19 (s, 5H), 4.13 – 4.04 (m, 3H), 3.91 (t, *J* = 10.4 Hz, 1H), 3.84 (td, *J* = 2.4, 1.3 Hz, 1H), 3.30 (dt, *J* = 2.6, 1.4 Hz, 1H), 3.13 (s, 1H), 1.13 (t, *J* = 7.1 Hz, 3H). <sup>13</sup>C NMR (101 MHz, CDCl<sub>3</sub>) δ 196.2, 174.2, 139.7, 137.6, 133.0, 128.6, 128.6, 128.3, 128.2, 127.1, 88.6, 68.9, 68.7, 68.7, 67.8, 66.9, 65.8, 61.6, 61.4, 60.5, 50.7, 27.1, 14.3. FT-IR (neat, cm<sup>-1</sup>): 2980.1, 2927.1, 1728.1, 1673.3, 1219.6, 1197.8, 1184.5, 753.7. HRMS: (ESI-TOF) calculated for C<sub>30</sub>H<sub>30</sub>FeNO<sub>3</sub> [M+H]<sup>+</sup> 508.1570, found 508.1568.

**HPLC analysis:** CHIRALPAK IC, heptane/2-propanol (90/10, 0.5 mL/min), λ = 254 nm, t<sub>R</sub> = 6.669 min (minor), 8.964 min (minor).

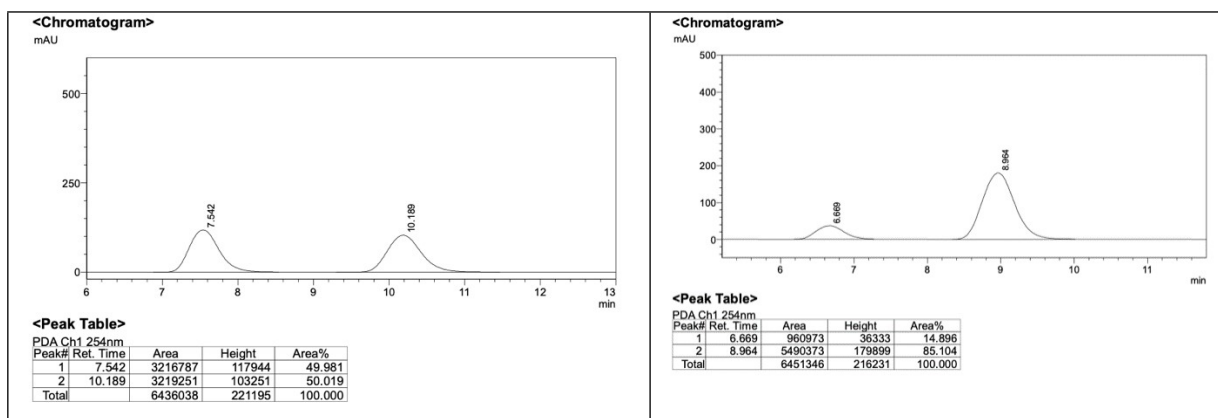



**(2R,3S,4R,5S)-Ethyl-4-benzoyl-3-phenyl-5-(thiophen-2-yl)pyrrolidine-2-carboxylate (3u)<sup>2</sup>**

White solid, Yield = 37% (22.8 mg); m.p.= 152 – 153 °C, R<sub>f</sub> = 0.40 (cyclohexane/ethyl acetate, 3:1), [α]<sub>D</sub><sup>20</sup> = +37.75 (c = 0.5, CHCl<sub>3</sub>), (*endo/exo* = >99:1), 82:18 er; <sup>1</sup>H NMR (400 MHz, CDCl<sub>3</sub>) δ 7.71

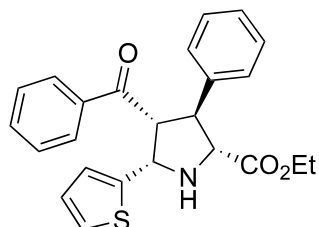

– 7.68 (m, 2H), 7.47 (ddt, *J* = 7.9, 6.9, 1.3 Hz, 1H), 7.40 – 7.30 (m, 6H), 7.24 – 7.20 (m, 1H), 7.04 (dd, *J* = 5.0, 1.3 Hz, 1H), 6.74 (dd, *J* = 5.0, 3.5 Hz, 1H), 6.71 (ddd, *J* = 3.6, 1.3, 0.7 Hz, 1H), 5.28 (d, *J* = 8.2 Hz, 1H), 4.54 (t, *J* = 8.6 Hz, 1H), 4.26 (dq, *J* = 10.8, 7.1 Hz, 1H), 4.17 – 4.09 (m, 3H), 3.08 (s, 1H), 1.17 (t, *J* = 7.1 Hz, 3H). <sup>13</sup>C NMR (101 MHz, CDCl<sub>3</sub>) δ 197.5, 172.9, 143.4, 140.4, 137.4, 133.1, 128.8, 128.6, 128.3, 128.1,

127.2, 126.7, 125.6, 124.8, 67.4, 61.8, 61.4, 60.4, 51.7, 14.3. FT-IR (neat, cm<sup>-1</sup>): 2907.5, 1722.7, 1670.6, 1210.1, 1182.8, 1159.3, 706.6. HRMS: (ESI-TOF) calculated for C<sub>24</sub>H<sub>24</sub>NO<sub>3</sub>S [M+H]<sup>+</sup> 406.1471, found 406.1471.

**HPLC analysis:** CHIRALPAK IC, heptane/2-propanol (90/10, 0.5 mL/min), λ = 254 nm, t<sub>R</sub> = 22.053 min (minor), 27.358 min (minor).

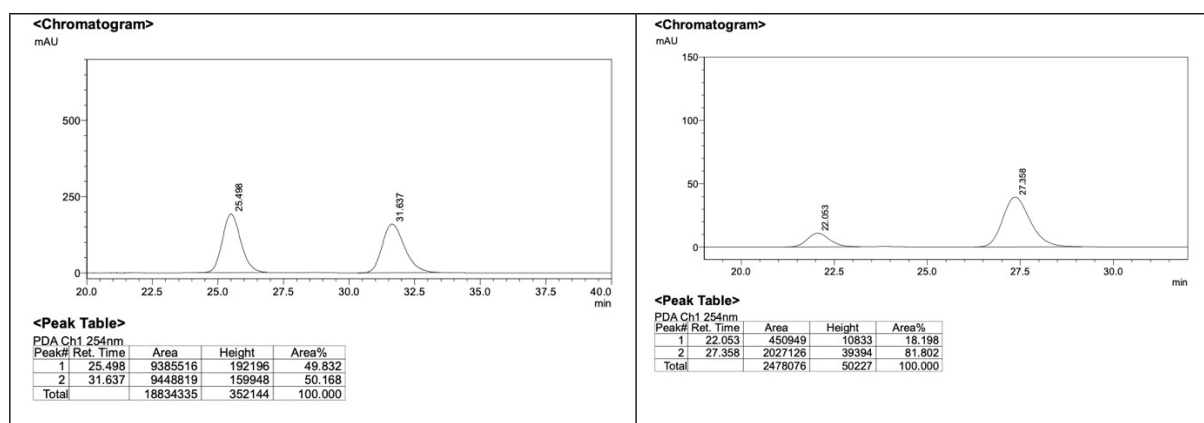**(2R,3S,4R,5R)-Ethyl-4-benzoyl-5-cyclohexyl-3-phenylpyrrolidine-2-carboxylate (3v)**

White solid, yield = 28% (17.2 mg); m.p.= 82 – 83 °C, R<sub>f</sub> = 0.52 (cyclohexane/ethyl acetate, 3:1), [α]<sub>D</sub><sup>20</sup> = +9.73 (c = 0.31, CHCl<sub>3</sub>), (*endo/exo* = >99:1), 72:28 er; <sup>1</sup>H NMR (400 MHz, CDCl<sub>3</sub>) δ 7.77

(dd, *J* = 8.5, 1.3 Hz, 2H), 7.52 (ddt, *J* = 7.7, 6.7, 1.3 Hz, 1H), 7.41 – 7.33 (m, 4H), 7.29 – 7.26 (m, 3H), 4.25 – 4.13 (m, 2H), 4.09 (dd, *J* = 6.4, 4.1 Hz, 1H), 3.93 (d, *J* = 7.3 Hz, 1H), 3.52 (dd, *J* = 7.3,

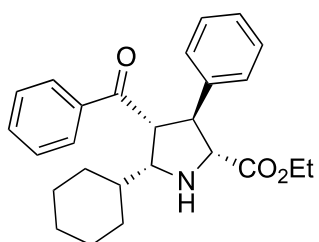

4.1 Hz, 1H), 3.38 (dd, *J* = 9.4, 6.4 Hz, 1H), 2.92 (s, 1H), 2.13 (d, *J* = 12.9 Hz, 1H), 1.71 (d, *J* = 12.4 Hz, 1H), 1.57 (d, *J* = 10.8 Hz, 2H), 1.44 (d, *J* = 4.2 Hz, 1H), 1.31 (d, *J* = 6.5 Hz, 1H), 1.19 (t, *J* = 7.1 Hz, 3H), 1.12 – 1.07

(m, 3H), 0.96 – 0.90 (m, 2H). <sup>13</sup>C NMR (101 MHz, CDCl<sub>3</sub>) δ 202.7, 172.4, 142.9, 138.0, 133.3, 129.0, 128.9, 128.1, 127.6, 127.2, 71.7, 69.6, 61.2, 56.7, 56.7, 38.6, 31.9, 31.6, 26.4, 25.9, 25.8, 14.3. FT-IR (neat, cm<sup>-1</sup>): 2927.8, 2851.0, 1731.8,



1665.4, 1197.9, 1181.4, 1161.6, 696.3. **HRMS: (ESI-TOF)** calculated for  $C_{26}H_{32}NO_3$   $[M+H]^+$  406.2377, found 406.2379.

**HPLC analysis:** CHIRALPAK ID, heptane/2-propanol (90/10, 0.5 mL/min),  $\lambda = 254$  nm,  $t_R = 14.073$  min (minor), 21.060 min (minor).

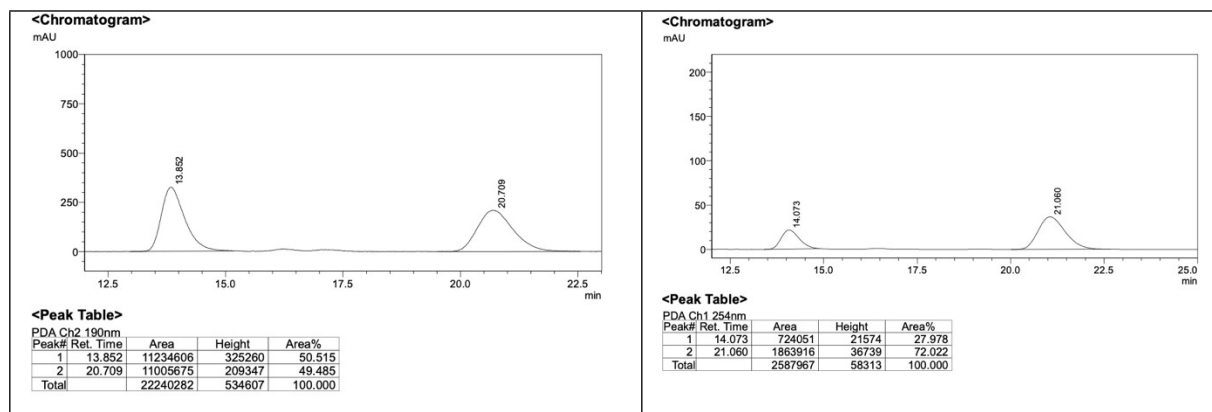

**(2R,3S,4R,5S)-Ethyl-(2R,3S,4R,5S)-4-benzoyl-5-(4-chlorophenyl)-2-methyl-3-phenylpyrrolidine-2-carboxylate (3w)**

White solid, yield = 48% (33.1 mg); m.p. = 198 – 199 °C,  $R_f = 0.41$  (cyclohexane/ethyl acetate, 3:1),

$[\alpha]_D^{20} = +34.74$  ( $c = 1.00$ ,  $CHCl_3$ ), (*endo/exo* = >99:1), 75:25 er;  $^1H$  NMR (400 MHz,  $CDCl_3$ )  $\delta$  7.63 – 7.60 (m, 2H), 7.48 – 7.44 (m, 1H), 7.34 – 7.30 (m, 2H), 7.28 – 7.26 (m, 5H), 7.09 – 7.03 (m, 4H), 5.02 (d,  $J = 9.5$  Hz, 1H), 4.89 (dd,  $J = 10.5, 9.4$  Hz, 1H), 4.44 (d,  $J = 10.5$  Hz, 1H), 3.83 (s, 3H), 3.13 (s, 1H), 1.29 (s, 3H).  $^{13}C$  NMR (101 MHz,  $CDCl_3$ )  $\delta$  197.7, 175.9, 138.7, 137.7, 137.6, 133.5, 133.2, 129.3, 128.7, 128.6, 128.5, 128.3, 128.1, 127.4, 68.7, 63.5, 56.5, 54.7, 52.7, 21.8. FT-IR (neat,  $cm^{-1}$ ): 2919.0, 2853.4, 1730.7, 1671.5, 1202.7, 1166.2, 1145.2, 699.2. **HRMS: (ESI-TOF)** calculated for  $C_{26}H_{25}ClNO_3$   $[M+H]^+$  434.1517, found 434.1523.

**HPLC analysis:** CHIRALPAK IC, heptane/2-propanol (90/10, 0.5 mL/min),  $\lambda = 254$  nm,  $t_R = 8.874$  min (minor), 10.248 min (minor).

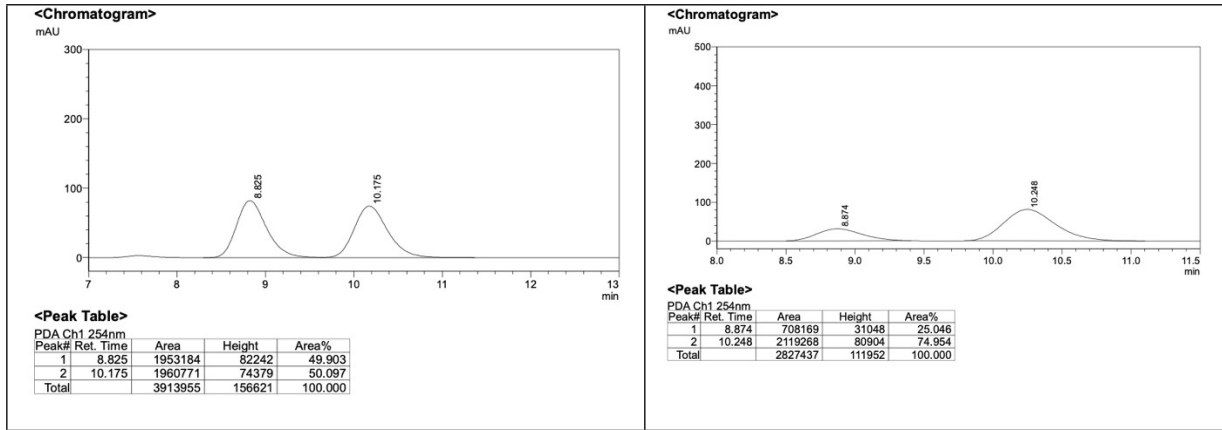

## 4. Scaled-up Synthesis of 3a and its Derivatization

### 4.1 General Procedure for the Zn-Catalyzed [3+2] Azomethine Ylide Cycloaddition

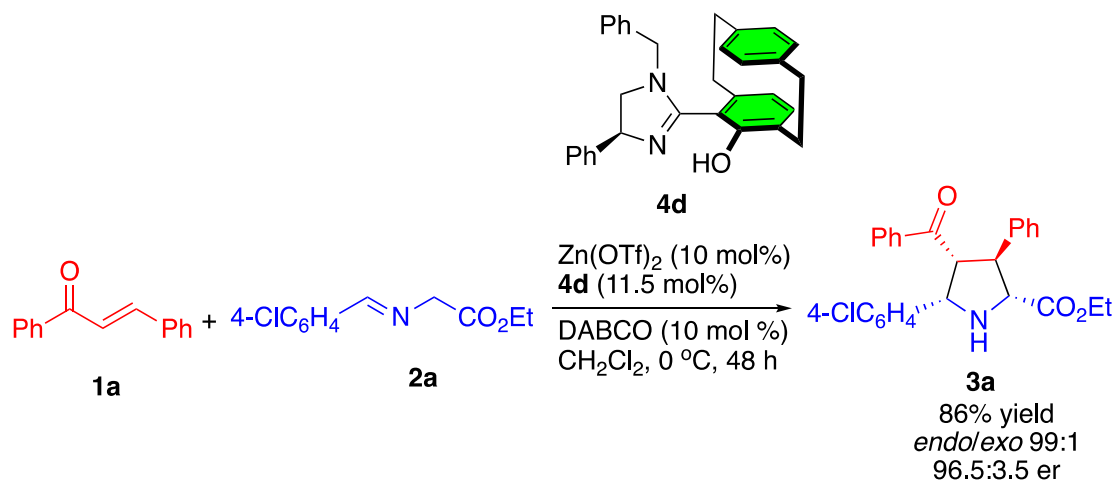

Under nitrogen atmosphere, ligand (*S,S,S<sub>p</sub>*)-**4d** (52.7 mg, 11.5 mol %) and Zn(OTf)<sub>2</sub> (36.3 mg, 10 mol %) was added to a flame-dried 20 mL schlenk tube. Then dry CH<sub>2</sub>Cl<sub>2</sub> (3 mL) was added and stirred for 60 minutes. After cooled at 0 °C, acyclic enone **1** (208.3 mg, 1 mmol, 1.0 equiv) in CH<sub>2</sub>Cl<sub>2</sub> (3 mL),  $\alpha$ -iminoester **2** (451.2 mg, 2 mmol, 2 equiv) in CH<sub>2</sub>Cl<sub>2</sub>, (3 mL) and DABCO (11.2 mg, 10 mol %) in CH<sub>2</sub>Cl<sub>2</sub> (1 mL) were added sequentially. The reaction mixture was stirred at the same temperature for 48 h. After completion, the reaction mixture was directly purified by silica gel column chromatography (30% ethyl acetate in cyclohexane) to afford the desired product **3a** in 86% yield (376.5 mg) with 99:1 *endo/exo* and 96.5:3.5 er.

### 4.2 General procedure for the synthesis of diketopiperazine **8**<sup>3</sup>

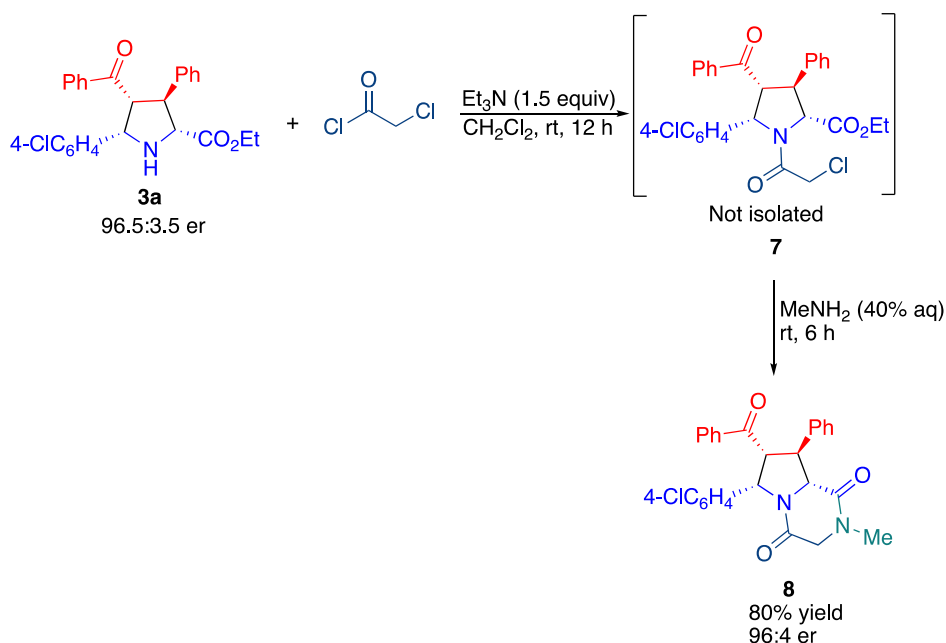

To a mixture of **3a** (1 equiv, 0.2 mmol, 86.8 mg) and triethylamine (1.5 equiv, 0.3 mmol, 41.8  $\mu$ L) in CH<sub>2</sub>Cl<sub>2</sub> (5 mL) at 0 °C was added chloroacetyl chloride (1.5 equiv, 0.3 mmol, 23.9  $\mu$ L). The

reaction was stirred for 30 min. at 0 °C and warmed to room temperature. After being stirred for another 3 h, the reaction mixture was quenched with water (5 mL) and extracted three times with CH<sub>2</sub>Cl<sub>2</sub>. The combined organic layers were dried over Na<sub>2</sub>SO<sub>4</sub> and concentrated under vacuum, gave crude product 7. The crude product 7 was dissolved in CH<sub>2</sub>Cl<sub>2</sub> (5 mL) follow by the addition of methylamine (40% aq. 1.6 mL). The mixture was stirred overnight. The resulting reaction mixture was quenched with water (5 mL) and extracted three times with CH<sub>2</sub>Cl<sub>2</sub>. The combined organic layers were dried over Na<sub>2</sub>SO<sub>4</sub> and concentrated under reduce pressure afforded the crude product which silica gel column chromatography (100% ethyl acetate) to deliver the desired product **8** in 80% (73.5 mg) yield.

**(6*S*,7*R*,8*S*,8*aR*)-7-benzoyl-6-(4-chlorophenyl)-2-methyl-8-phenyltetrahydropyrrolo[1,2-*a*]pyrazine-1,3(2*H*,4*H*)-dione (8)**

White solid, yield = 80 % (73.5 mg); m.p.= 283 – 284 °C, R<sub>f</sub> = 0.28 (ethyl acetate), [α]<sub>D</sub><sup>20</sup> = +72.23 (c = 1, CHCl<sub>3</sub>), 96:4 er; <sup>1</sup>H NMR (400 MHz, CDCl<sub>3</sub>) δ 7.70 (dd, *J* = 8.4, 1.3 Hz, 2H), 7.55 (ddt, *J* = 7.8, 6.9, 1.3 Hz, 1H), 7.51 – 7.48 (m, 2H), 7.43 – 7.39 (m, 2H), 7.33 – 7.29 (m, 2H), 7.22 – 7.18 (m, 1H), 7.09 – 7.05 (m, 2H), 6.74 – 6.71 (m, 2H), 5.68 (d, *J* = 8.6 Hz, 1H), 4.69 – 4.56 (m, 3H), 4.22 (dd, *J* = 16.8, 1.3 Hz, 1H), 3.77 (d, *J* = 16.8 Hz, 1H), 3.02 (s, 3H). <sup>13</sup>C NMR (101 MHz, CDCl<sub>3</sub>) δ 193.5, 167.3, 164.3, 138.0, 137.0, 135.1, 134.2, 133.9, 129.0, 128.9, 128.7, 128.5, 128.21, 128.19, 127.7, 64.0, 61.9, 57.1, 54.0, 45.5, 33.8. FT-IR (neat, cm<sup>-1</sup>): 1688.7, 1669.9, 1415.6, 1402.0, 1212.6, 692.6. HRMS: (ESI-TOF) calculated for C<sub>27</sub>H<sub>24</sub>ClN<sub>2</sub>O<sub>3</sub> [M+H]<sup>+</sup> 459.1470, found 459.1472.

**HPLC analysis:** CHIRALPAK IB, CO<sub>2</sub>/MEOH (60 to 40, 3 mL/min), λ = 254 nm, *t*<sub>R</sub> = 4.300 min (major), 4.637 min (minor).

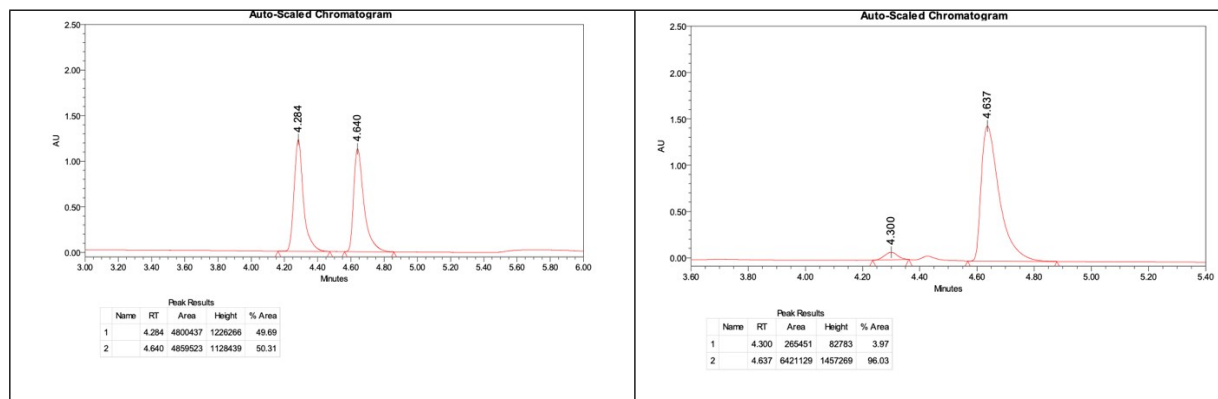

## 5. General procedure for the synthesis of Zn-complex **9**

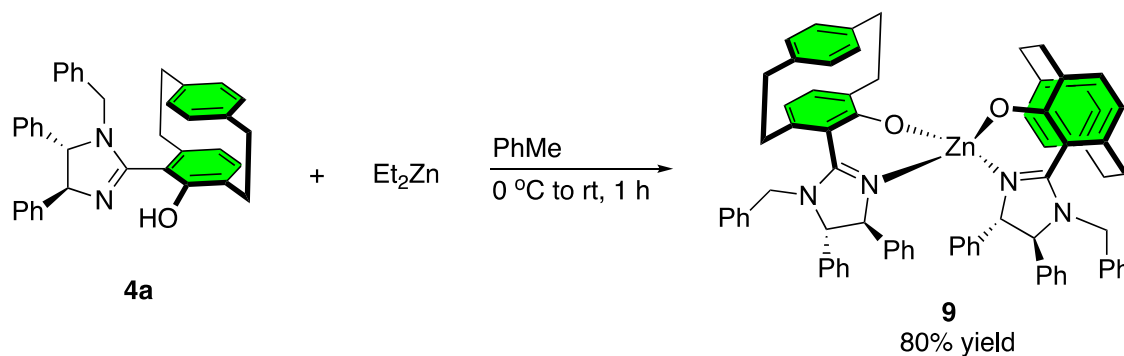

Under a nitrogen atmosphere, ligand (*S,S,S<sub>p</sub>*)-**4a** (0.25 mmol, 2 equiv.) and  $\text{Et}_2\text{Zn}$  (0.125 mmol, 1 equiv.) were added to a flame-dried 15 mL schlenk tube. Then dry toluene (2 mL) was added and stirred at 0 °C. Then  $\text{Et}_2\text{Zn}$  was added, and the reaction mixture was stirred at room temperature for 2 h. After completion, the solvent was evaporated under vacuum, and the crude product was recrystallized using a  $\text{CHCl}_3/\text{Et}_2\text{O}$  mixture, which gave the pure complex **9** in 80% yield (113.5 mg). Yellow solid, m.p. 170–171;  $[\alpha]_{\text{D}}^{20} = -304.66$  ( $c = 1.0$ ,  $\text{CHCl}_3$ )

**$^1\text{H NMR}$  (500 MHz,  $\text{CDCl}_3$ )**  $\delta$  7.54 (d,  $J = \text{Hz}$ , 2H), 7.50 – 7.46 (m, 6H), 7.40 – 7.36 (m, 3H), 7.24 – 7.20 (m, 5H), 7.12 – 7.07 (m, 4H), 7.04 – 7.02 (m, 2H), 6.96 – 6.92 (m, 4H), 6.81 – 6.77 (m, 4H), 6.72 (dd,  $J = 8.0, 2.3$ , 1H), 6.69 – 6.66 (m, 4H), 6.63 (dd,  $J = 7.7, 2.0$ , 1H), 6.59 – 6.55 (m, 3H), 6.50 (d,  $J = 7.7$  Hz, 1H), 6.40 (d,  $J = 7.6$  Hz, 1H), 6.23 (d,  $J = 7.8$  Hz, 1H), 5.83 (d,  $J = 7.3$  Hz, 1H), 5.30 (d,  $J = 4.4$  Hz, 1H), 4.98 (d,  $J = 16.4$  Hz, 1H), 4.67 (d,  $J = 16.1$  Hz, 1H), 4.60 (d,  $J = \text{Hz}$ , 1H), 4.58 (d,  $J = \text{Hz}$ , 1H), 3.85 (td,  $J = 11.4, 4.4$  Hz, 1H), 3.74 (d,  $J = 16.8$  Hz, 1H), 3.62 (d,  $J = 16.4$  Hz, 1H), 3.49 (ddd,  $J = 12.7, 10.0, 2.3$  Hz, 1H), 3.32 – 3.27 (m, 1H), 3.23 – 3.13 (m, 2H), 3.01 – 2.99 (m, 2H), 2.98 – 2.92 (m, 2H), 2.89 – 2.71 (m, 4H), 2.64 – 2.59 (m, 1H), 2.58 – 2.53 (m, 2H).  **$^{13}\text{C NMR}$  (101 MHz,  $\text{CDCl}_3$ )**  $\delta$  170.6, 169.6, 144.24, 142.20, 141.7, 140.6, 140.44, 140.42, 140.2, 138.2, 137.9, 137.8, 137.6, 137.0, 136.9, 136.4, 133.0, 132.9, 132.5, 132.2, 132.1, 132.0, 131.0, 129.2, 129.1, 129.0, 128.6, 128.45, 128.40, 128.0, 127.70, 127.66, 127.5, 127.14, 127.10, 127.0, 126.4, 126.3, 126.2, 125.5, 122.4, 110.7, 76.1, 71.7, 71.1, 70.1, 49.5, 48.4, 35.9, 35.5, 35.2, 35.0, 34.9, 34.2, 31.3, 29.4. **FT-IR (neat,  $\text{cm}^{-1}$ ):** 2921.2, 2850.3, 1515.6, 1495.9, 1410.6, 1385.0, 802.4, 752.2, 696.8.

## 6. References

1. G. S. Caleffi, O. Larrañaga, M. Martín-Rodríguez, P. R. R. Costa, C. Nájera, A. Cózar, F. P. Cossío and J. M. Sansano, *J. Org. Chem.* **2019**, *84*, 10593.

- 
2. Zhang, Y.; Su, J.; Lin, T.; Lin, Z.; Zhou, Z.; Li, Y. Iodine/ $K_2CO_3$ -catalyzed synthesis of multisubstituted pyrrolidine-2-carboxylates via a one-pot reaction between an araldehyde, an amino acid ester, and a chalcone. *J. Chem. Res.* **2019**, *43*, 90–96.
3. García-Mingüens, E.; Selva, V.; Larrañaga, O.; Nájera, C.; Sansano, J. M.; Cózar, A. Nitroprolinates as nucleophiles in Michael-type additions and acylations. Synthesis of enantiomerically enriched fused aminopyrrolidino-[1,2-a]pyrazinones and -diketopiperazines. *ChemCatChem* **2020**, *12*, 2014–2021.

## 7. X-Ray crystallographic structure and information for Zn-complex 9

### SCXRD- REPORT

|                                     |          |
|-------------------------------------|----------|
| <b>Research group</b>               | Guiry    |
| <b>Sample Code</b>                  | V-464    |
| <b>Internal sample code</b>         | Exp-1339 |
| <b>Data collection time (hours)</b> | 9        |

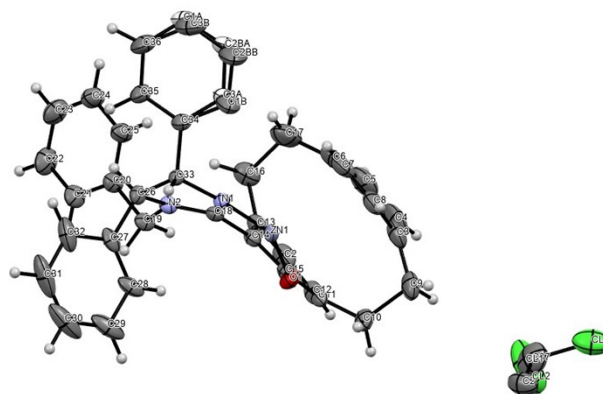

Figure 1. Asymmetric unit, showing the atom-labelling scheme. Displacement ellipsoids are drawn at the 50% probability level. Graphics were obtained using Mercury 3.0.

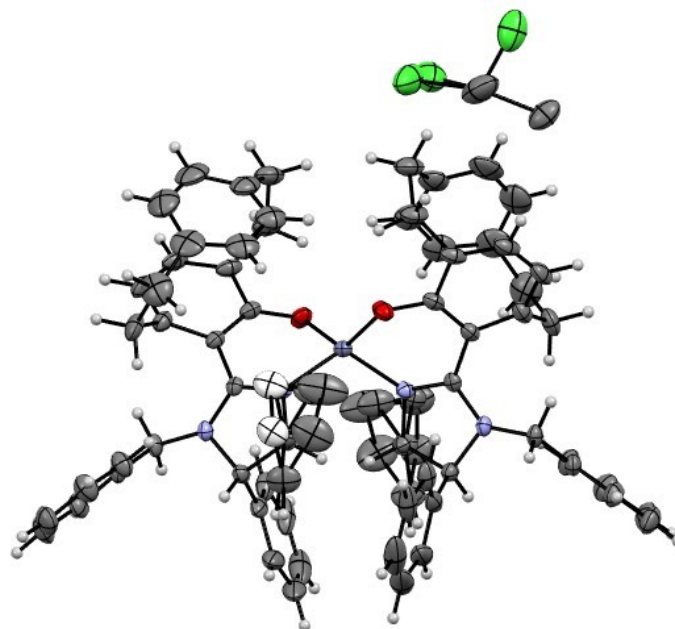

Figure 2. Crystal structure of V-464

Table 1. Crystal data and structure refinement for V-464

|                                            |                                                                                     |
|--------------------------------------------|-------------------------------------------------------------------------------------|
| Empirical formula                          | C <sub>80.41</sub> H <sub>60</sub> C <sub>14</sub> N <sub>4</sub> O <sub>2</sub> Zn |
| Formula weight                             | 1321.37                                                                             |
| Temperature [K]                            | 108(5)                                                                              |
| Crystal system                             | trigonal                                                                            |
| Space group<br>(number)                    | $P3_121$ (152)                                                                      |
| a [Å]                                      | 14.39140(10)                                                                        |
| b [Å]                                      | 14.39140(10)                                                                        |
| c [Å]                                      | 27.12110(10)                                                                        |
| $\alpha$ [°]                               | 90                                                                                  |
| $\beta$ [°]                                | 90                                                                                  |
| $\gamma$ [°]                               | 120                                                                                 |
| Volume [Å <sup>3</sup> ]                   | 4864.56(7)                                                                          |
| Z                                          | 3                                                                                   |
| $\rho_{\text{calc}}$ [gcm <sup>-3</sup> ]  | 1.353                                                                               |
| $\mu$ [mm <sup>-1</sup> ]                  | 2.456                                                                               |
| F(000)                                     | 2053                                                                                |
| Crystal size [mm <sup>3</sup> ]            | 0.362×0.27×0.247                                                                    |
| Crystal colour                             | translucent light<br>colourless                                                     |
| Crystal shape                              | block                                                                               |
| Radiation                                  | Cu K $\alpha$ ( $\lambda=1.54184$ Å)                                                |
| 2 $\theta$ range [°]                       | 7.09 to 152.83 (0.79 Å)                                                             |
| Index ranges                               | $-18 \leq h \leq 17$<br>$-16 \leq k \leq 18$<br>$-34 \leq l \leq 34$                |
| Reflections collected                      | 66795                                                                               |
| Independent<br>reflections                 | 6788<br>R <sub>int</sub> = 0.0405<br>R <sub>sigma</sub> = 0.0150                    |
| Completeness to<br>$\theta = 67.684^\circ$ | 100.0 %                                                                             |
| Data / Restraints /<br>Parameters          | 6788/0/457                                                                          |
| Goodness-of-fit on<br>F <sup>2</sup>       | 1.058                                                                               |
| Final R indexes<br>[ $I \geq 2\sigma(I)$ ] | R <sub>1</sub> = 0.0351<br>wR <sub>2</sub> = 0.0977                                 |
| Final R indexes<br>[all data]              | R <sub>1</sub> = 0.0354<br>wR <sub>2</sub> = 0.0981                                 |
| Largest peak/hole<br>[eÅ <sup>-3</sup> ]   | 0.32/-0.50                                                                          |
| Flack X parameter                          | -0.002(5)                                                                           |



## Refinement details for V-464

Table 2. Atomic coordinates and Ueq [Å<sup>2</sup>] for V-464

| Atom   | x           | y           | z           | Ueq         |
|--------|-------------|-------------|-------------|-------------|
| C2BA   | 1.0619(5)   | 0.6919(5)   | 0.5923(3)   | 0.055(3)    |
| C11    | 0.1804(3)   | 0.4558(3)   | 0.45651(13) | 0.0918(12)  |
| C12    | 0.1488(4)   | 0.4770(5)   | 0.4580(2)   | 0.0709(11)  |
| H36    | 1.295(4)    | 0.918(3)    | 0.6104(15)  | 0.051(10)   |
| Zn1_1  | 0.79963(3)  | 0.79963(3)  | 0.500000    | 0.02126(12) |
| O1_1   | 0.73430(15) | 0.74336(15) | 0.43703(7)  | 0.0309(4)   |
| N1_1   | 0.93698(16) | 0.80749(16) | 0.48177(7)  | 0.0208(4)   |
| N2_1   | 1.05510(17) | 0.82458(17) | 0.42385(7)  | 0.0230(4)   |
| C27_1  | 1.1261(2)   | 1.0212(2)   | 0.43128(10) | 0.0325(6)   |
| C32_1  | 1.2129(3)   | 1.1202(3)   | 0.44366(14) | 0.0520(10)  |
| H32_1  | 1.268342    | 1.124552    | 0.464301    | 0.062       |
| C31_1  | 1.2180(4)   | 1.2147(3)   | 0.4251(2)   | 0.0741(16)  |
| H31_1  | 1.276917    | 1.282805    | 0.433627    | 0.089       |
| C30_1  | 1.1392(5)   | 1.2087(4)   | 0.39521(18) | 0.0756(17)  |
| H30_1  | 1.143322    | 1.272561    | 0.383093    | 0.091       |
| C29_1  | 1.0544(4)   | 1.1115(3)   | 0.38259(12) | 0.0569(11)  |
| H29_1  | 1.000021    | 1.107906    | 0.361494    | 0.068       |
| C28_1  | 1.0473(3)   | 1.0177(3)   | 0.40047(10) | 0.0382(7)   |
| H28_1  | 0.987747    | 0.950296    | 0.391518    | 0.046       |
| C26_1  | 1.1154(2)   | 0.9205(2)   | 0.45471(9)  | 0.0246(5)   |
| H26_1  | 1.187834    | 0.930987    | 0.462839    | 0.030       |
| C33_1  | 1.04387(18) | 0.88659(19) | 0.50109(8)  | 0.0210(4)   |
| H33_1  | 1.040890    | 0.950076    | 0.514090    | 0.025       |
| C18_1  | 0.95027(19) | 0.77324(19) | 0.43868(8)  | 0.0207(4)   |
| C34_1  | 1.0811(2)   | 0.8408(2)   | 0.54194(10) | 0.0318(6)   |
| C35_1  | 1.1851(2)   | 0.8986(3)   | 0.55955(11) | 0.0349(6)   |
| H35_1  | 1.234243    | 0.963244    | 0.543274    | 0.042       |
| C36_1  | 1.2202(3)   | 0.8663(3)   | 0.59956(15) | 0.0529(9)   |
| C15_1  | 0.7602(2)   | 0.68767(19) | 0.40788(9)  | 0.0256(5)   |
| C11_1  | 0.6792(2)   | 0.6135(2)   | 0.37490(9)  | 0.0320(6)   |
| C12_1  | 0.7058(3)   | 0.5587(2)   | 0.34148(10) | 0.0378(7)   |
| H12_1  | 0.658149    | 0.522038    | 0.314995    | 0.045       |
| C2_1   | 0.8007(3)   | 0.5557(2)   | 0.34549(10) | 0.0380(7)   |
| H2_1   | 0.815296    | 0.514339    | 0.322792    | 0.046       |
| C13_1  | 0.8741(2)   | 0.6127(2)   | 0.38242(9)  | 0.0308(6)   |
| C14_1  | 0.8617(2)   | 0.69175(19) | 0.40869(8)  | 0.0239(5)   |
| C19_1  | 1.0991(2)   | 0.8236(2)   | 0.37548(8)  | 0.0264(5)   |
| H19A_1 | 1.113769    | 0.889057    | 0.357173    | 0.032       |
| H19B_1 | 1.045172    | 0.760729    | 0.356597    | 0.032       |
| C20_1  | 1.2018(2)   | 0.8186(2)   | 0.37928(9)  | 0.0274(5)   |
| C21_1  | 1.2745(2)   | 0.8571(3)   | 0.34025(10) | 0.0363(6)   |
| H21_1  | 1.260081    | 0.887332    | 0.312195    | 0.044       |
| C22_1  | 1.3680(3)   | 0.8513(3)   | 0.34215(12) | 0.0477(8)   |
| H22_1  | 1.417438    | 0.878279    | 0.315499    | 0.057       |
| C23_1  | 1.3897(3)   | 0.8065(3)   | 0.38273(13) | 0.0473(7)   |

|        |             |             |             |            |
|--------|-------------|-------------|-------------|------------|
| H23_1  | 1.452938    | 0.801354    | 0.383537    | 0.057      |
| C24_1  | 1.3192(3)   | 0.7695(3)   | 0.42185(13) | 0.0435(7)  |
| H24_1  | 1.334177    | 0.739439    | 0.449802    | 0.052      |
| C25_1  | 1.2258(3)   | 0.7762(3)   | 0.42046(11) | 0.0365(6)  |
| H25_1  | 1.178108    | 0.751596    | 0.447777    | 0.044      |
| C10_1  | 0.5635(2)   | 0.5824(3)   | 0.38474(11) | 0.0398(7)  |
| H10A_1 | 0.526706    | 0.574910    | 0.352906    | 0.048      |
| H10B_1 | 0.561870    | 0.640397    | 0.403643    | 0.048      |
| C9_1   | 0.5004(3)   | 0.4732(3)   | 0.41460(13) | 0.0501(9)  |
| H9A_1  | 0.457782    | 0.481710    | 0.441030    | 0.060      |
| H9B_1  | 0.450085    | 0.415768    | 0.392159    | 0.060      |
| C3_1   | 0.5757(3)   | 0.4410(3)   | 0.43708(13) | 0.0500(8)  |
| C8_1   | 0.6410(3)   | 0.4968(3)   | 0.47793(12) | 0.0490(8)  |
| H8_1   | 0.617215    | 0.530682    | 0.500649    | 0.059      |
| C7_1   | 0.7386(3)   | 0.5027(3)   | 0.48533(14) | 0.0538(9)  |
| H7_1   | 0.781614    | 0.541868    | 0.512683    | 0.065      |
| C6_1   | 0.7750(4)   | 0.4525(3)   | 0.45352(17) | 0.0606(11) |
| C5_1   | 0.7013(4)   | 0.3788(3)   | 0.42050(18) | 0.0670(12) |
| H5_1   | 0.718221    | 0.331677    | 0.403266    | 0.080      |
| C4_1   | 0.6020(4)   | 0.3727(3)   | 0.41216(17) | 0.0653(12) |
| H4_1   | 0.552634    | 0.321816    | 0.389398    | 0.078      |
| C16_1  | 0.9437(3)   | 0.5698(3)   | 0.40195(11) | 0.0409(7)  |
| H16A_1 | 1.015101    | 0.630935    | 0.410606    | 0.049      |
| H16B_1 | 0.954085    | 0.528210    | 0.375623    | 0.049      |
| C17_1  | 0.8944(4)   | 0.4959(4)   | 0.44874(18) | 0.0663(11) |
| H17A_1 | 0.908155    | 0.435153    | 0.446600    | 0.080      |
| H17B_1 | 0.930793    | 0.537711    | 0.478680    | 0.080      |
| C1A_1  | 1.1637(6)   | 0.7587(6)   | 0.6128(3)   | 0.051(3)   |
| C3A_1  | 1.0222(5)   | 0.7320(5)   | 0.5558(3)   | 0.035(2)   |
| C1B_1  | 0.9994(8)   | 0.7699(10)  | 0.5764(4)   | 0.057(5)   |
| C2BB_1 | 1.0277(10)  | 0.7429(12)  | 0.6214(5)   | 0.090(7)   |
| C3B_1  | 1.1369(10)  | 0.7949(12)  | 0.6355(5)   | 0.079(6)   |
| C12_2  | 0.04454(12) | 0.43376(11) | 0.54429(4)  | 0.0769(3)  |
| C37_2  | 0.1532(4)   | 0.5239(4)   | 0.5069(2)   | 0.0827(15) |
| C2_3   | 0.1370(4)   | 0.6316(3)   | 0.53160(16) | 0.0586(10) |

U<sub>eq</sub> is defined as 1/3 of the trace of the orthogonalized U<sub>ij</sub> tensor.

Table 3. Anisotropic displacement parameters [ $\text{\AA}^2$ ] for V-464.

The anisotropic displacement factor exponent takes the form:

$$-2\pi^2[h_2(a^*)^2U_{11} + k_2(b^*)^2U_{22} + \dots + 2hka^*b^*U_{12}]$$

| Atom  | U11         | U22         | U33        | U23         | U13         | U12         |
|-------|-------------|-------------|------------|-------------|-------------|-------------|
| C2BA  | 0.054(4)    | 0.052(4)    | 0.059(4)   | 0.025(3)    | -0.002(3)   | 0.028(3)    |
| C11   | 0.115(3)    | 0.0615(16)  | 0.0546(12) | -0.0107(11) | 0.0286(17)  | 0.0110(16)  |
| C12   | 0.071(2)    | 0.066(2)    | 0.069(2)   | 0.0131(17)  | 0.0152(16)  | 0.0290(16)  |
| Zn1 1 | 0.01876(16) | 0.01876(16) | 0.0232(2)  | -0.00052(8) | 0.00052(8)  | 0.00708(17) |
| O1 1  | 0.0276(9)   | 0.0295(9)   | 0.0355(9)  | -0.0102(7)  | -0.0099(7)  | 0.0142(7)   |
| N1 1  | 0.0203(9)   | 0.0219(9)   | 0.0186(8)  | -0.0014(7)  | -0.0023(7)  | 0.0093(8)   |
| N2 1  | 0.0262(10)  | 0.0266(10)  | 0.0179(9)  | -0.0021(8)  | 0.0016(8)   | 0.0144(9)   |
| C27 1 | 0.0417(15)  | 0.0255(12)  | 0.0251(12) | 0.0024(10)  | 0.0150(11)  | 0.0128(12)  |
| C32 1 | 0.0500(19)  | 0.0310(15)  | 0.0525(19) | -0.0028(14) | 0.0264(16)  | 0.0034(14)  |
| C31 1 | 0.082(3)    | 0.0244(16)  | 0.093(3)   | 0.0048(18)  | 0.057(3)    | 0.0097(18)  |
| C30 1 | 0.127(5)    | 0.050(2)    | 0.068(3)   | 0.032(2)    | 0.063(3)    | 0.058(3)    |
| C29 1 | 0.105(3)    | 0.059(2)    | 0.0337(16) | 0.0207(15)  | 0.0325(19)  | 0.061(2)    |
| C28 1 | 0.063(2)    | 0.0403(15)  | 0.0232(12) | 0.0098(11)  | 0.0144(13)  | 0.0350(15)  |
| C26 1 | 0.0229(11)  | 0.0281(12)  | 0.0207(10) | -0.0018(9)  | 0.0020(9)   | 0.0111(10)  |
| C33 1 | 0.0186(10)  | 0.0229(10)  | 0.0196(10) | -0.0006(8)  | 0.0002(8)   | 0.0090(9)   |
| C18 1 | 0.0262(11)  | 0.0205(10)  | 0.0187(10) | 0.0017(8)   | 0.0003(9)   | 0.0142(9)   |
| C34 1 | 0.0302(13)  | 0.0341(13)  | 0.0282(12) | 0.0045(10)  | -0.0056(10) | 0.0141(11)  |
| C35 1 | 0.0310(14)  | 0.0428(16)  | 0.0326(13) | -0.0025(12) | -0.0088(11) | 0.0196(12)  |
| C36 1 | 0.0434(19)  | 0.061(2)    | 0.054(2)   | 0.0038(17)  | -0.0209(16) | 0.0257(17)  |
| C15 1 | 0.0299(13)  | 0.0187(10)  | 0.0220(10) | -0.0001(8)  | -0.0040(9)  | 0.0075(9)   |
| C11 1 | 0.0341(14)  | 0.0238(12)  | 0.0228(11) | 0.0014(9)   | -0.0068(10) | 0.0030(10)  |
| C12 1 | 0.0440(15)  | 0.0268(13)  | 0.0221(11) | -0.0041(10) | -0.0047(11) | 0.0024(11)  |
| C2 1  | 0.0540(18)  | 0.0267(13)  | 0.0240(12) | -0.0073(10) | 0.0013(12)  | 0.0132(13)  |
| C13 1 | 0.0432(15)  | 0.0227(11)  | 0.0229(11) | -0.0010(9)  | 0.0037(10)  | 0.0139(11)  |
| C14 1 | 0.0304(12)  | 0.0188(10)  | 0.0193(10) | -0.0004(8)  | -0.0008(9)  | 0.0100(9)   |
| C19 1 | 0.0332(13)  | 0.0328(13)  | 0.0183(10) | 0.0015(9)   | 0.0050(9)   | 0.0205(11)  |
| C20 1 | 0.0327(13)  | 0.0291(13)  | 0.0250(11) | -0.0017(10) | 0.0046(10)  | 0.0190(11)  |
| C21 1 | 0.0378(14)  | 0.0458(16)  | 0.0245(12) | 0.0012(11)  | 0.0084(11)  | 0.0204(13)  |
| C22 1 | 0.0381(16)  | 0.066(2)    | 0.0388(15) | -0.0028(15) | 0.0118(13)  | 0.0254(16)  |
| C23 1 | 0.0374(16)  | 0.063(2)    | 0.0516(17) | -0.0063(17) | 0.0028(15)  | 0.0324(15)  |
| C24 1 | 0.0411(16)  | 0.0526(19)  | 0.0458(17) | 0.0060(14)  | 0.0001(13)  | 0.0302(15)  |
| C25 1 | 0.0381(15)  | 0.0451(16)  | 0.0339(14) | 0.0078(12)  | 0.0059(12)  | 0.0266(13)  |
| C10 1 | 0.0316(14)  | 0.0359(15)  | 0.0341(14) | -0.0042(11) | -0.0112(11) | 0.0036(12)  |
| C9 1  | 0.0385(16)  | 0.0387(17)  | 0.0431(17) | -0.0021(14) | 0.0000(13)  | -0.0032(14) |
| C3 1  | 0.0520(19)  | 0.0274(14)  | 0.0478(18) | 0.0098(13)  | 0.0097(15)  | 0.0027(13)  |
| C8 1  | 0.0531(19)  | 0.0414(16)  | 0.0398(15) | 0.0157(13)  | 0.0065(14)  | 0.0142(15)  |
| C7 1  | 0.063(2)    | 0.0428(18)  | 0.0457(17) | 0.0238(15)  | 0.0057(16)  | 0.0192(17)  |
| C6 1  | 0.073(3)    | 0.0383(18)  | 0.070(2)   | 0.0297(18)  | 0.008(2)    | 0.0275(19)  |
| C5 1  | 0.088(3)    | 0.0324(17)  | 0.079(3)   | 0.0144(18)  | 0.015(2)    | 0.029(2)    |
| C4 1  | 0.078(3)    | 0.0209(14)  | 0.072(3)   | 0.0083(15)  | 0.009(2)    | 0.0062(16)  |
| C16 1 | 0.061(2)    | 0.0335(14)  | 0.0372(14) | -0.0073(12) | 0.0018(14)  | 0.0307(15)  |
| C17 1 | 0.082(3)    | 0.063(2)    | 0.071(3)   | 0.019(2)    | 0.003(2)    | 0.050(2)    |
| C1A 1 | 0.052(4)    | 0.061(4)    | 0.048(4)   | 0.017(3)    | -0.005(3)   | 0.035(3)    |
| C3A 1 | 0.039(3)    | 0.032(3)    | 0.033(3)   | 0.006(2)    | -0.002(2)   | 0.016(2)    |
| C1B 1 | 0.053(5)    | 0.061(7)    | 0.039(5)   | 0.023(5)    | -0.008(4)   | 0.015(4)    |

|        |            |            |           |             |            |           |
|--------|------------|------------|-----------|-------------|------------|-----------|
| C2BB_1 | 0.070(8)   | 0.101(10)  | 0.068(8)  | 0.046(7)    | -0.023(6)  | 0.019(7)  |
| C3B_1  | 0.069(6)   | 0.107(10)  | 0.063(8)  | 0.026(7)    | -0.017(5)  | 0.046(6)  |
| C12_2  | 0.1163(10) | 0.0916(8)  | 0.0493(5) | -0.0053(5)  | -0.0107(5) | 0.0719(8) |
| C37_2  | 0.070(3)   | 0.052(2)   | 0.113(4)  | -0.024(3)   | -0.027(3)  | 0.021(2)  |
| C2_3   | 0.080(3)   | 0.0419(19) | 0.057(2)  | -0.0033(16) | -0.017(2)  | 0.033(2)  |
|        |            |            |           |             |            |           |
|        |            |            |           |             |            |           |

Table 4. Bond lengths and angles for V-464

| Atom-Atom    | Length [Å] |
|--------------|------------|
| C2BA-C1A_1   | 1.404(10)  |
| C2BA-C3A_1   | 1.402(7)   |
| C11-C37_2    | 1.833(7)   |
| C12-C37_2    | 1.474(8)   |
| Zn1_1-O1_1   | 1.9223(18) |
| Zn1_1-O1_1#1 | 1.9224(18) |
| Zn1_1-N1_1   | 1.985(2)   |
| Zn1_1-N1_1#1 | 1.985(2)   |
| O1_1-C15_1   | 1.306(3)   |
| N1_1-C33_1   | 1.478(3)   |
| N1_1-C18_1   | 1.319(3)   |
| N2_1-C26_1   | 1.471(3)   |
| N2_1-C18_1   | 1.367(3)   |
| N2_1-C19_1   | 1.460(3)   |
| C27_1-C32_1  | 1.387(5)   |
| C27_1-C28_1  | 1.389(5)   |
| C27_1-C26_1  | 1.518(4)   |
| C32_1-H32_1  | 0.9500     |
| C32_1-C31_1  | 1.417(6)   |
| C31_1-H31_1  | 0.9500     |
| C31_1-C30_1  | 1.362(8)   |
| C30_1-H30_1  | 0.9500     |
| C30_1-C29_1  | 1.361(8)   |
| C29_1-H29_1  | 0.9500     |
| C29_1-C28_1  | 1.389(4)   |
| C28_1-H28_1  | 0.9500     |
| C26_1-H26_1  | 1.0000     |
| C26_1-C33_1  | 1.542(3)   |
| C33_1-H33_1  | 1.0000     |
| C33_1-C34_1  | 1.517(3)   |
| C18_1-C14_1  | 1.472(3)   |
| C34_1-C35_1  | 1.384(4)   |
| C34_1-C3A_1  | 1.408(6)   |
| C34_1-C1B_1  | 1.449(9)   |
| C35_1-H35_1  | 0.9500     |
| C35_1-C36_1  | 1.372(4)   |
| C36_1-H36    | 0.99(5)    |
| C36_1-C1A_1  | 1.388(8)   |
| C36_1-C3B_1  | 1.487(13)  |
| C15_1-C11_1  | 1.433(3)   |
| C15_1-C14_1  | 1.431(4)   |
| C11_1-C12_1  | 1.375(4)   |
| C11_1-C10_1  | 1.517(4)   |
| C12_1-H12_1  | 0.9500     |
| C12_1-C2_1   | 1.393(5)   |
| C2_1-H2_1    | 0.9500     |
| C2_1-C13_1   | 1.388(4)   |
| C13_1-C14_1  | 1.427(3)   |
| C13_1-C16_1  | 1.511(4)   |
| C19_1-H19A_1 | 0.9900     |
| C19_1-H19B_1 | 0.9900     |
| C19_1-C20_1  | 1.519(4)   |
| C20_1-C21_1  | 1.394(4)   |
| C20_1-C25_1  | 1.397(4)   |
| C21_1-H21_1  | 0.9500     |
| C21_1-C22_1  | 1.390(4)   |
| C22_1-H22_1  | 0.9500     |
| C22_1-C23_1  | 1.388(5)   |
| C23_1-H23_1  | 0.9500     |
| C23_1-C24_1  | 1.378(5)   |
| C24_1-H24_1  | 0.9500     |
| C24_1-C25_1  | 1.394(4)   |
| C25_1-H25_1  | 0.9500     |
| C10_1-H10A_1 | 0.9900     |
| C10_1-H10B_1 | 0.9900     |
| C10_1-C9_1   | 1.588(4)   |
| C9_1-H9A_1   | 0.9900     |
| C9_1-H9B_1   | 0.9900     |
| C9_1-C3_1    | 1.504(6)   |
| C3_1-C8_1    | 1.414(5)   |
| C3_1-C4_1    | 1.392(6)   |
| C8_1-H8_1    | 0.9500     |
| C8_1-C7_1    | 1.379(6)   |
| C7_1-H7_1    | 0.9500     |
| C7_1-C6_1    | 1.385(6)   |
| C6_1-C5_1    | 1.388(7)   |
| C6_1-C17_1   | 1.512(7)   |

|                       |            |
|-----------------------|------------|
| C5_1–H5_1             | 0.9500     |
| C5_1–C4_1             | 1.406(8)   |
| C4_1–H4_1             | 0.9500     |
| C16_1–H16A_1          | 0.9900     |
| C16_1–H16B_1          | 0.9900     |
| C16_1–C17_1           | 1.578(5)   |
| C17_1–H17A_1          | 0.9900     |
| C17_1–H17B_1          | 0.9900     |
| C1B_1–C2BB_1          | 1.400(11)  |
| C2BB_1–C3B_1          | 1.414(15)  |
| C12_2–C37_2           | 1.769(7)   |
| C37_2–C2_3            | 1.808(7)   |
|                       |            |
| Atom–Atom–Atom        | Angle [°]  |
| C3A_1–C2BA–<br>C1A_1  | 119.8(5)   |
| O1_1–Zn1_1–<br>O1_1   | 125.85(13) |
| O1_1–Zn1_1–<br>N1_1   | 114.40(8)  |
| O1_1–Zn1_1–<br>N1_1   | 93.79(8)   |
| O1_1–Zn1_1–<br>N1_1   | 93.79(8)   |
| O1_1–Zn1_1–<br>N1_1   | 114.40(8)  |
| N1_1–Zn1_1–<br>N1_1   | 116.48(12) |
| C15_1–O1_1–<br>Zn1_1  | 124.52(16) |
| C33_1–N1_1–<br>Zn1_1  | 125.36(15) |
| C18_1–N1_1–<br>Zn1_1  | 121.72(16) |
| C18_1–N1_1–<br>C33_1  | 108.20(19) |
| C18_1–N2_1–<br>C26_1  | 108.30(18) |
| C18_1–N2_1–<br>C19_1  | 128.7(2)   |
| C19_1–N2_1–<br>C26_1  | 117.7(2)   |
| C32_1–C27_1–<br>C28_1 | 118.9(3)   |
| C32_1–C27_1–<br>C26_1 | 119.2(3)   |
| C28_1–C27_1–<br>C26_1 | 121.7(3)   |
| C27_1–C32_1–          | 120.4      |

|                       |            |
|-----------------------|------------|
| H32_1                 |            |
| C27_1–C32_1–<br>C31_1 | 119.1(5)   |
| C31_1–C32_1–<br>H32_1 | 120.4      |
| C32_1–C31_1–<br>H31_1 | 119.7      |
| C30_1–C31_1–<br>C32_1 | 120.6(4)   |
| C30_1–C31_1–<br>H31_1 | 119.7      |
| C31_1–C30_1–<br>H30_1 | 119.8      |
| C29_1–C30_1–<br>C31_1 | 120.3(4)   |
| C29_1–C30_1–<br>H30_1 | 119.8      |
| C30_1–C29_1–<br>H29_1 | 119.9      |
| C30_1–C29_1–<br>C28_1 | 120.2(4)   |
| C28_1–C29_1–<br>H29_1 | 119.9      |
| C27_1–C28_1–<br>C29_1 | 120.8(4)   |
| C27_1–C28_1–<br>H28_1 | 119.6      |
| C29_1–C28_1–<br>H28_1 | 119.6      |
| N2_1–C26_1–<br>C27_1  | 112.9(2)   |
| N2_1–C26_1–<br>H26_1  | 110.4      |
| N2_1–C26_1–<br>C33_1  | 100.34(19) |
| C27_1–C26_1–<br>H26_1 | 110.4      |
| C27_1–C26_1–<br>C33_1 | 112.1(2)   |
| C33_1–C26_1–<br>H26_1 | 110.4      |
| N1_1–C33_1–<br>C26_1  | 103.17(18) |
| N1_1–C33_1–<br>H33_1  | 109.0      |
| N1_1–C33_1–<br>C34_1  | 112.4(2)   |
| C26_1–C33_1–<br>H33_1 | 109.0      |

|                       |          |
|-----------------------|----------|
| C34_1-C33_1-<br>C26_1 | 114.1(2) |
| C34_1-C33_1-<br>H33_1 | 109.0    |
| N1_1-C18_1-<br>N2_1   | 112.7(2) |
| N1_1-C18_1-<br>C14_1  | 123.9(2) |
| N2_1-C18_1-<br>C14_1  | 123.4(2) |
| C35_1-C34_1-<br>C33_1 | 120.1(2) |
| C35_1-C34_1-<br>C3A_1 | 116.4(3) |
| C35_1-C34_1-<br>C1B_1 | 117.0(4) |
| C3A_1-C34_1-<br>C33_1 | 122.1(3) |
| C1B_1-C34_1-<br>C33_1 | 116.0(4) |
| C34_1-C35_1-<br>H35_1 | 118.7    |
| C36_1-C35_1-<br>C34_1 | 122.7(3) |
| C36_1-C35_1-<br>H35_1 | 118.7    |
| C35_1-C36_1-<br>H36   | 115(2)   |
| C35_1-C36_1-<br>C1A_1 | 118.2(4) |
| C35_1-C36_1-<br>C3B_1 | 116.5(5) |
| C1A_1-C36_1-<br>H36   | 124(2)   |
| C3B_1-C36_1-<br>H36   | 121(2)   |
| O1_1-C15_1-<br>C11_1  | 117.3(2) |
| O1_1-C15_1-<br>C14_1  | 124.3(2) |
| C14_1-C15_1-<br>C11_1 | 118.3(2) |
| C15_1-C11_1-<br>C10_1 | 118.3(2) |
| C12_1-C11_1-<br>C15_1 | 118.9(3) |
| C12_1-C11_1-<br>C10_1 | 121.7(2) |
| C11_1-C12_1-          | 119.2    |

|                         |          |
|-------------------------|----------|
| H12_1                   |          |
| C11_1-C12_1-<br>C2_1    | 121.6(3) |
| C2_1-C12_1-<br>H12_1    | 119.2    |
| C12_1-C2_1-<br>H2_1     | 119.8    |
| C13_1-C2_1-<br>C12_1    | 120.4(3) |
| C13_1-C2_1-<br>H2_1     | 119.8    |
| C2_1-C13_1-<br>C14_1    | 118.0(3) |
| C2_1-C13_1-<br>C16_1    | 118.4(3) |
| C14_1-C13_1-<br>C16_1   | 121.6(2) |
| C15_1-C14_1-<br>C18_1   | 120.0(2) |
| C13_1-C14_1-<br>C18_1   | 120.4(2) |
| C13_1-C14_1-<br>C15_1   | 119.4(2) |
| N2_1-C19_1-<br>H19A_1   | 109.2    |
| N2_1-C19_1-<br>H19B_1   | 109.2    |
| N2_1-C19_1-<br>C20_1    | 112.1(2) |
| H19A_1-C19_1-<br>H19B_1 | 107.9    |
| C20_1-C19_1-<br>H19A_1  | 109.2    |
| C20_1-C19_1-<br>H19B_1  | 109.2    |
| C21_1-C20_1-<br>C19_1   | 119.0(2) |
| C21_1-C20_1-<br>C25_1   | 118.7(3) |
| C25_1-C20_1-<br>C19_1   | 122.3(2) |
| C20_1-C21_1-<br>H21_1   | 119.8    |
| C22_1-C21_1-<br>C20_1   | 120.4(3) |
| C22_1-C21_1-<br>H21_1   | 119.8    |
| C21_1-C22_1-<br>H22_1   | 119.8    |

|                         |          |
|-------------------------|----------|
| C23_1-C22_1-<br>C21_1   | 120.4(3) |
| C23_1-C22_1-<br>H22_1   | 119.8    |
| C22_1-C23_1-<br>H23_1   | 120.1    |
| C24_1-C23_1-<br>C22_1   | 119.8(3) |
| C24_1-C23_1-<br>H23_1   | 120.1    |
| C23_1-C24_1-<br>H24_1   | 120.0    |
| C23_1-C24_1-<br>C25_1   | 120.1(3) |
| C25_1-C24_1-<br>H24_1   | 120.0    |
| C20_1-C25_1-<br>H25_1   | 119.7    |
| C24_1-C25_1-<br>C20_1   | 120.6(3) |
| C24_1-C25_1-<br>H25_1   | 119.7    |
| C11_1-C10_1-<br>H10A_1  | 109.1    |
| C11_1-C10_1-<br>H10B_1  | 109.1    |
| C11_1-C10_1-<br>C9_1    | 112.5(3) |
| H10A_1-C10_1-<br>H10B_1 | 107.8    |
| C9_1-C10_1-<br>H10A_1   | 109.1    |
| C9_1-C10_1-<br>H10B_1   | 109.1    |
| C10_1-C9_1-<br>H9A_1    | 109.3    |
| C10_1-C9_1-<br>H9B_1    | 109.3    |
| H9A_1-C9_1-<br>H9B_1    | 108.0    |
| C3_1-C9_1-<br>C10_1     | 111.6(3) |
| C3_1-C9_1-<br>H9A_1     | 109.3    |
| C3_1-C9_1-<br>H9B_1     | 109.3    |
| C8_1-C3_1-C9_1          | 121.3(3) |
| C4_1-C3_1-C9_1          | 120.9(4) |
| C4_1-C3_1-C8_1          | 116.2(4) |

|                         |           |
|-------------------------|-----------|
| C3_1-C8_1-H8_1          | 119.4     |
| C7_1-C8_1-C3_1          | 121.1(4)  |
| C7_1-C8_1-H8_1          | 119.4     |
| C8_1-C7_1-H7_1          | 119.5     |
| C8_1-C7_1-C6_1          | 121.1(4)  |
| C6_1-C7_1-H7_1          | 119.5     |
| C7_1-C6_1-C5_1          | 117.1(4)  |
| C7_1-C6_1-<br>C17_1     | 119.1(4)  |
| C5_1-C6_1-<br>C17_1     | 122.5(5)  |
| C6_1-C5_1-H5_1          | 119.5     |
| C6_1-C5_1-C4_1          | 121.1(4)  |
| C4_1-C5_1-H5_1          | 119.5     |
| C3_1-C4_1-C5_1          | 120.3(4)  |
| C3_1-C4_1-H4_1          | 119.8     |
| C5_1-C4_1-H4_1          | 119.8     |
| C13_1-C16_1-<br>H16A_1  | 109.0     |
| C13_1-C16_1-<br>H16B_1  | 109.0     |
| C13_1-C16_1-<br>C17_1   | 113.0(3)  |
| H16A_1-C16_1-<br>H16B_1 | 107.8     |
| C17_1-C16_1-<br>H16A_1  | 109.0     |
| C17_1-C16_1-<br>H16B_1  | 109.0     |
| C6_1-C17_1-<br>C16_1    | 112.5(3)  |
| C6_1-C17_1-<br>H17A_1   | 109.1     |
| C6_1-C17_1-<br>H17B_1   | 109.1     |
| C16_1-C17_1-<br>H17A_1  | 109.1     |
| C16_1-C17_1-<br>H17B_1  | 109.1     |
| H17A_1-C17_1-<br>H17B_1 | 107.8     |
| C36_1-C1A_1-<br>C2BA    | 119.4(5)  |
| C2BA-C3A_1-<br>C34_1    | 120.3(5)  |
| C2BB_1-C1B_1-<br>C34_1  | 120.7(9)  |
| C1B_1-C2BB_1-<br>C3B_1  | 119.4(10) |

|                        |          |
|------------------------|----------|
| C2BB_1–C3B_1–<br>C36_1 | 119.1(8) |
| Cl2–C37_2–Cl2_2        | 111.1(3) |
| Cl2–C37_2–C2_3         | 137.0(5) |
| Cl2_2–C37_2–Cl1        | 112.5(3) |

|                      |          |
|----------------------|----------|
| Cl2_2–C37_2–<br>C2_3 | 88.3(3)  |
| C2_3–C37_2–Cl1       | 152.6(4) |

Symmetry transformations used to generate equivalent atoms:

#1: +Y, +X, 1-Z;

Table 5. Torsion angles for V-464

| Atom–Atom–Atom–Atom        | Torsion Angle [°] |
|----------------------------|-------------------|
| Zn1_1–O1_1–C15_1–<br>C11_1 | 153.04(18)        |
| Zn1_1–O1_1–C15_1–<br>C14_1 | –23.4(3)          |
| Zn1_1–N1_1–C33_1–<br>C26_1 | –136.66(17)       |
| Zn1_1–N1_1–C33_1–<br>C34_1 | 100.0(2)          |
| Zn1_1–N1_1–C18_1–<br>N2_1  | 153.04(16)        |
| Zn1_1–N1_1–C18_1–<br>C14_1 | –24.6(3)          |
| O1_1–C15_1–C11_1–<br>C12_1 | 175.8(2)          |
| O1_1–C15_1–C11_1–<br>C10_1 | –16.0(4)          |
| O1_1–C15_1–C14_1–<br>C18_1 | –9.0(4)           |
| O1_1–C15_1–C14_1–<br>C13_1 | 167.6(2)          |
| N1_1–C33_1–C34_1–<br>C35_1 | 171.0(3)          |
| N1_1–C33_1–C34_1–<br>C3A_1 | 5.1(5)            |
| N1_1–C33_1–C34_1–<br>C1B_1 | –38.9(8)          |
| N1_1–C18_1–C14_1–<br>C15_1 | 35.4(3)           |
| N1_1–C18_1–C14_1–<br>C13_1 | –141.1(2)         |
| N2_1–C26_1–C33_1–<br>N1_1  | –25.5(2)          |
| N2_1–C26_1–C33_1–<br>C34_1 | 96.7(2)           |
| N2_1–C18_1–C14_1–<br>C15_1 | –142.0(2)         |
| N2_1–C18_1–C14_1–<br>C13_1 | 41.5(3)           |
| N2_1–C19_1–C20_1–          | –155.8(2)         |

|                             |           |
|-----------------------------|-----------|
| C21_1                       |           |
| N2_1–C19_1–C20_1–<br>C25_1  | 24.6(4)   |
| C27_1–C32_1–C31_1–<br>C30_1 | –0.5(5)   |
| C27_1–C26_1–C33_1–<br>N1_1  | 94.5(2)   |
| C27_1–C26_1–C33_1–<br>C34_1 | –143.2(2) |
| C32_1–C27_1–C28_1–<br>C29_1 | –0.6(4)   |
| C32_1–C27_1–C26_1–<br>N2_1  | –153.3(2) |
| C32_1–C27_1–C26_1–<br>C33_1 | 94.3(3)   |
| C32_1–C31_1–C30_1–<br>C29_1 | –0.2(6)   |
| C31_1–C30_1–C29_1–<br>C28_1 | 0.5(5)    |
| C30_1–C29_1–C28_1–<br>C27_1 | –0.1(5)   |
| C28_1–C27_1–C32_1–<br>C31_1 | 0.9(4)    |
| C28_1–C27_1–C26_1–<br>N2_1  | 31.4(3)   |
| C28_1–C27_1–C26_1–<br>C33_1 | –81.0(3)  |
| C26_1–N2_1–C18_1–<br>N1_1   | –14.4(3)  |
| C26_1–N2_1–C18_1–<br>C14_1  | 163.3(2)  |
| C26_1–N2_1–C19_1–<br>C20_1  | 68.4(3)   |
| C26_1–C27_1–C32_1–<br>C31_1 | –174.6(3) |
| C26_1–C27_1–C28_1–<br>C29_1 | 174.8(2)  |
| C26_1–C33_1–C34_1–<br>C35_1 | 54.0(3)   |
| C26_1–C33_1–C34_1–<br>C3A_1 | –111.9(5) |



|                          |            |
|--------------------------|------------|
| C26_1-C33_1-C34_1-C1B_1  | -155.9(8)  |
| C33_1-N1_1-C18_1-N2_1    | -3.8(3)    |
| C33_1-N1_1-C18_1-C14_1   | 178.6(2)   |
| C33_1-C34_1-C35_1-C36_1  | 173.4(3)   |
| C33_1-C34_1-C3A_1-C2BA   | 177.1(6)   |
| C33_1-C34_1-C1B_1-C2BB_1 | -165.2(13) |
| C18_1-N1_1-C33_1-C26_1   | 19.1(2)    |
| C18_1-N1_1-C33_1-C34_1   | -104.3(2)  |
| C18_1-N2_1-C26_1-C27_1   | -94.9(2)   |
| C18_1-N2_1-C26_1-C33_1   | 24.6(2)    |
| C18_1-N2_1-C19_1-C20_1   | -140.3(2)  |
| C34_1-C35_1-C36_1-C1A_1  | 21.5(8)    |
| C34_1-C35_1-C36_1-C3B_1  | -24.4(10)  |
| C34_1-C1B_1-C2BB_1-C3B_1 | 7(3)       |
| C35_1-C34_1-C3A_1-C2BA   | 10.7(9)    |
| C35_1-C34_1-C1B_1-C2BB_1 | -14.2(19)  |
| C35_1-C36_1-C1A_1-C2BA   | -13.4(12)  |
| C35_1-C36_1-C3B_1-C2BB_1 | 16(2)      |
| C15_1-C11_1-C12_1-C2_1   | 13.8(4)    |
| C15_1-C11_1-C10_1-C9_1   | -96.1(3)   |
| C11_1-C15_1-C14_1-C18_1  | 174.6(2)   |
| C11_1-C15_1-C14_1-C13_1  | -8.9(3)    |
| C11_1-C12_1-C2_1-C13_1   | -3.1(5)    |
| C11_1-C10_1-C9_1-C3_1    | 14.4(4)    |
| C12_1-C11_1-C10_1-       | 71.7(3)    |

|                         |           |
|-------------------------|-----------|
| C9_1                    |           |
| C12_1-C2_1-C13_1-C14_1  | -13.6(4)  |
| C12_1-C2_1-C13_1-C16_1  | 150.5(3)  |
| C2_1-C13_1-C14_1-C18_1  | -164.1(2) |
| C2_1-C13_1-C14_1-C15_1  | 19.3(4)   |
| C2_1-C13_1-C16_1-C17_1  | -93.1(4)  |
| C13_1-C16_1-C17_1-C6_1  | 20.0(5)   |
| C14_1-C15_1-C11_1-C12_1 | -7.6(4)   |
| C14_1-C15_1-C11_1-C10_1 | 160.7(2)  |
| C14_1-C13_1-C16_1-C17_1 | 70.5(4)   |
| C19_1-N2_1-C26_1-C27_1  | 61.8(3)   |
| C19_1-N2_1-C26_1-C33_1  | -178.7(2) |
| C19_1-N2_1-C18_1-N1_1   | -167.7(2) |
| C19_1-N2_1-C18_1-C14_1  | 9.9(4)    |
| C19_1-C20_1-C21_1-C22_1 | -178.5(3) |
| C19_1-C20_1-C25_1-C24_1 | 177.7(3)  |
| C20_1-C21_1-C22_1-C23_1 | 0.5(6)    |
| C21_1-C20_1-C25_1-C24_1 | -1.8(5)   |
| C21_1-C22_1-C23_1-C24_1 | -1.4(6)   |
| C22_1-C23_1-C24_1-C25_1 | 0.6(6)    |
| C23_1-C24_1-C25_1-C20_1 | 1.0(6)    |
| C25_1-C20_1-C21_1-C22_1 | 1.1(5)    |
| C10_1-C11_1-C12_1-C2_1  | -154.0(3) |
| C10_1-C9_1-C3_1-C8_1    | 72.3(4)   |
| C10_1-C9_1-C3_1-C4_1    | -92.8(4)  |
| C9_1-C3_1-C8_1-C7_1     | -151.0(3) |
| C9_1-C3_1-C4_1-C5_1     | 151.9(4)  |

|                          |           |
|--------------------------|-----------|
| C3_1-C8_1-C7_1-C6_1      | -1.3(5)   |
| C8_1-C3_1-C4_1-C5_1      | -13.9(5)  |
| C8_1-C7_1-C6_1-C5_1      | -12.9(5)  |
| C8_1-C7_1-C6_1-C17_1     | 154.3(3)  |
| C7_1-C6_1-C5_1-C4_1      | 13.6(5)   |
| C7_1-C6_1-C17_1-C16_1    | -98.8(4)  |
| C6_1-C5_1-C4_1-C3_1      | 0.0(6)    |
| C5_1-C6_1-C17_1-C16_1    | 67.7(5)   |
| C4_1-C3_1-C8_1-C7_1      | 14.7(4)   |
| C16_1-C13_1-C14_1-C18_1  | 32.4(4)   |
| C16_1-C13_1-C14_1-C15_1  | -144.2(3) |
| C17_1-C6_1-C5_1-C4_1     | -153.1(4) |
| C1A_1-C2BA-C3A_1-C34_1   | -4.0(13)  |
| C3A_1-C2BA-C1A_1-C36_1   | 5.2(14)   |
| C3A_1-C34_1-C35_1-C36_1  | -19.9(6)  |
| C1B_1-C34_1-C35_1-C36_1  | 23.6(9)   |
| C1B_1-C2BB_1-C3B_1-C36_1 | -8(3)     |

## 7. Copy of NMR spectra

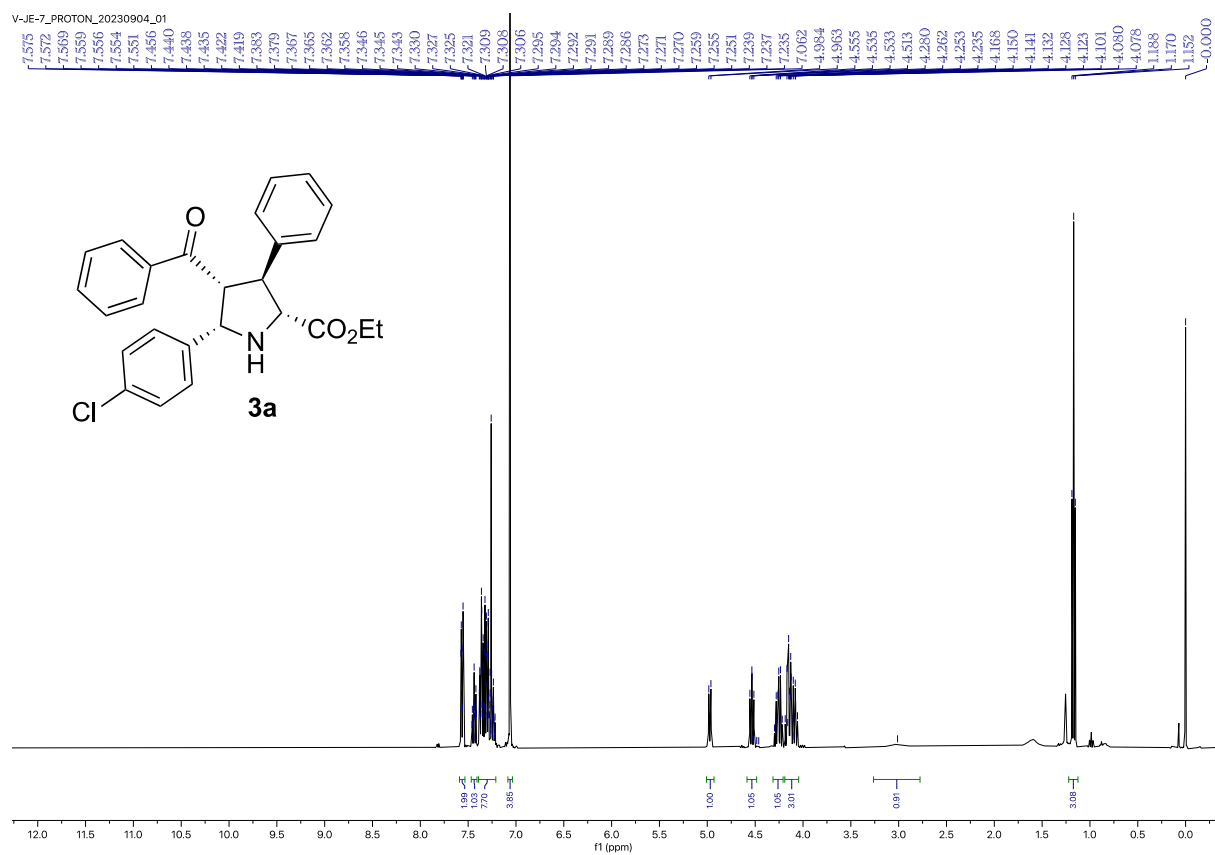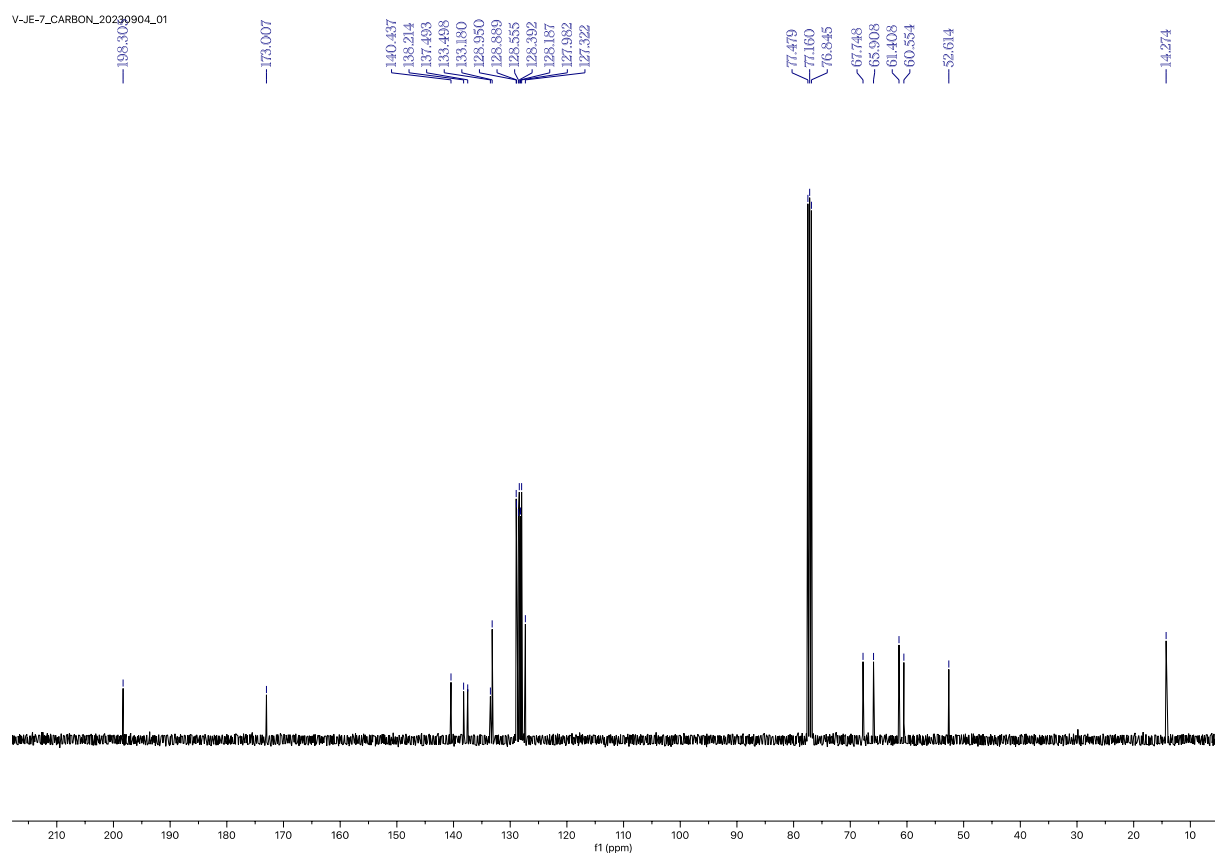

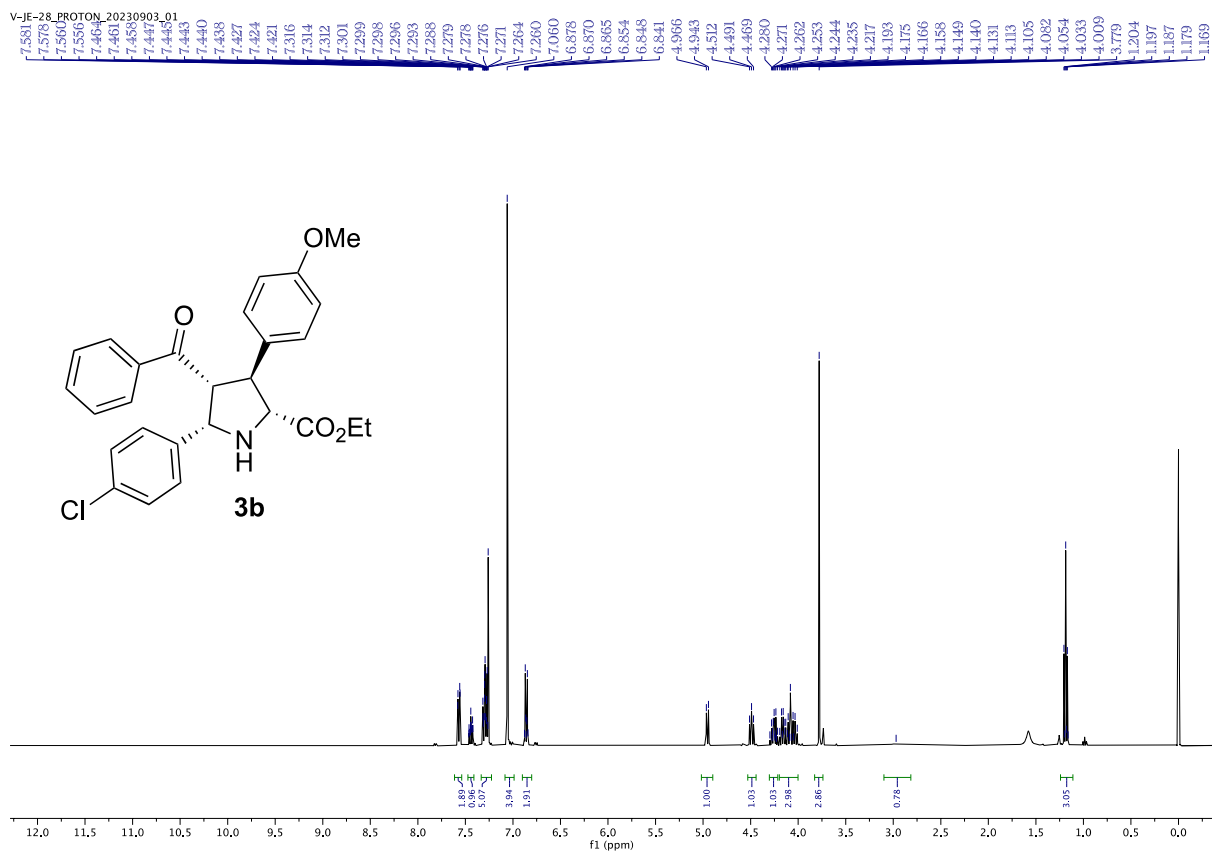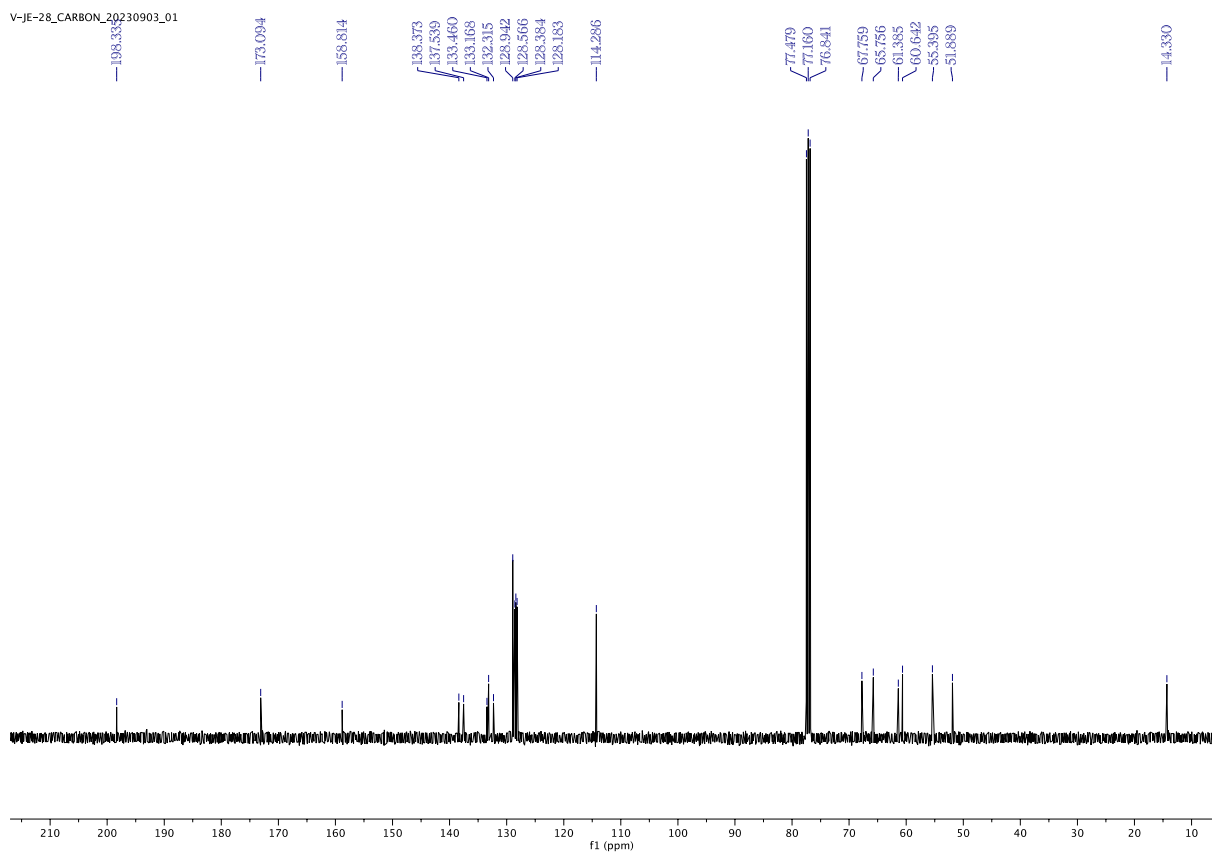

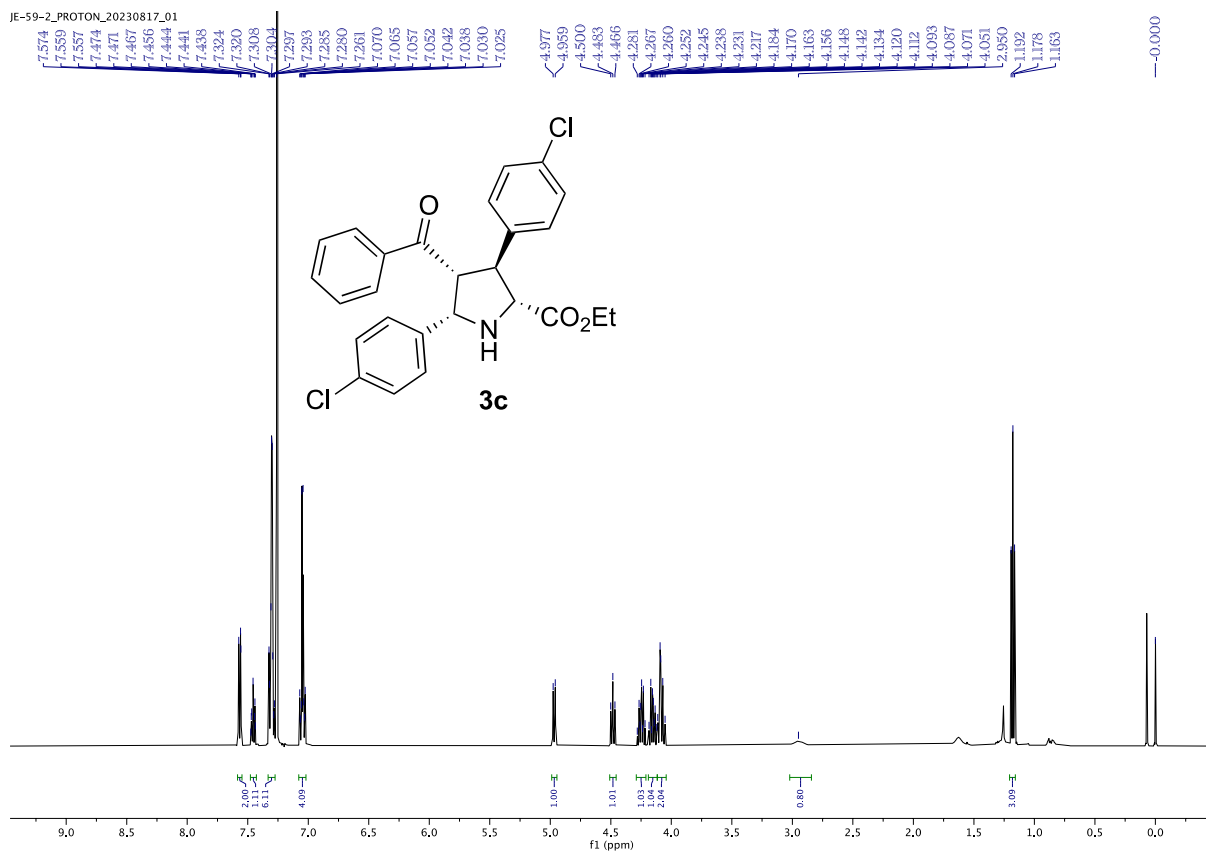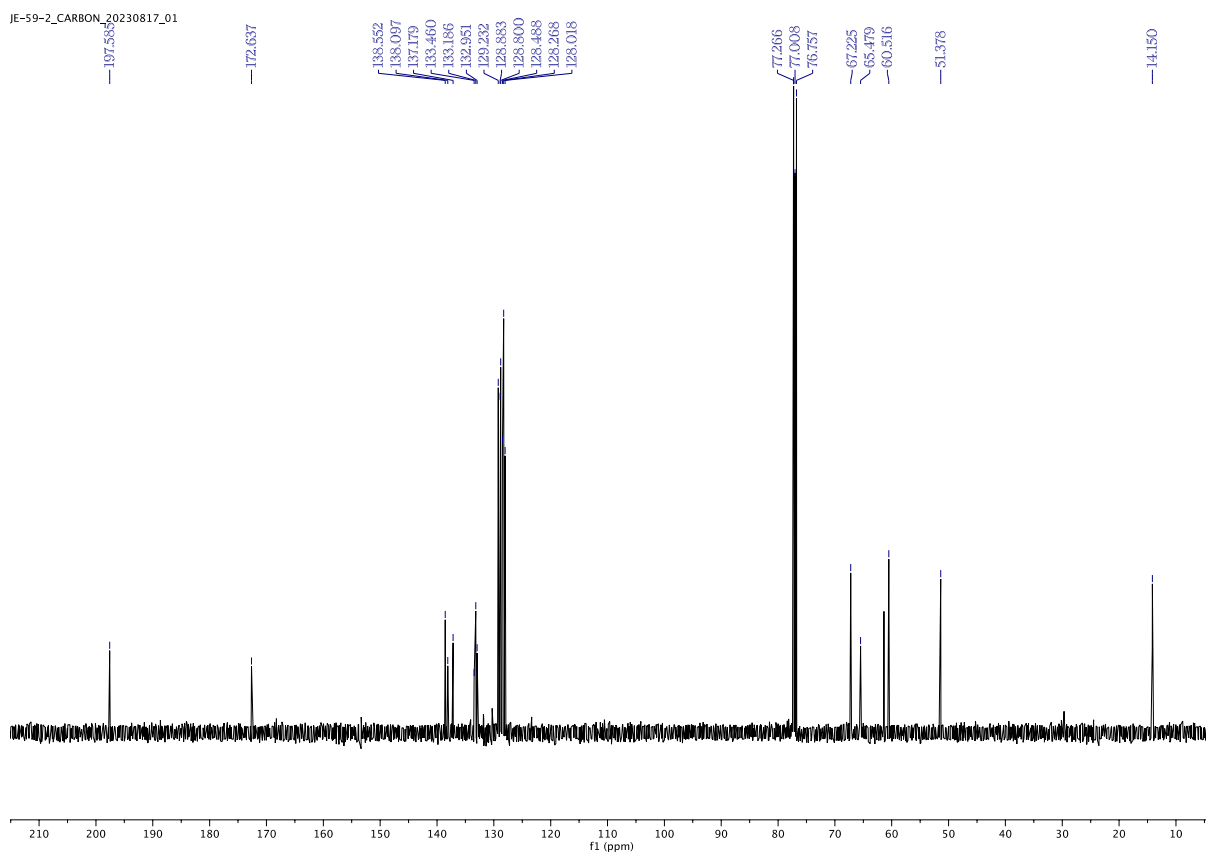

JE-31\_PROTON\_20230711\_01

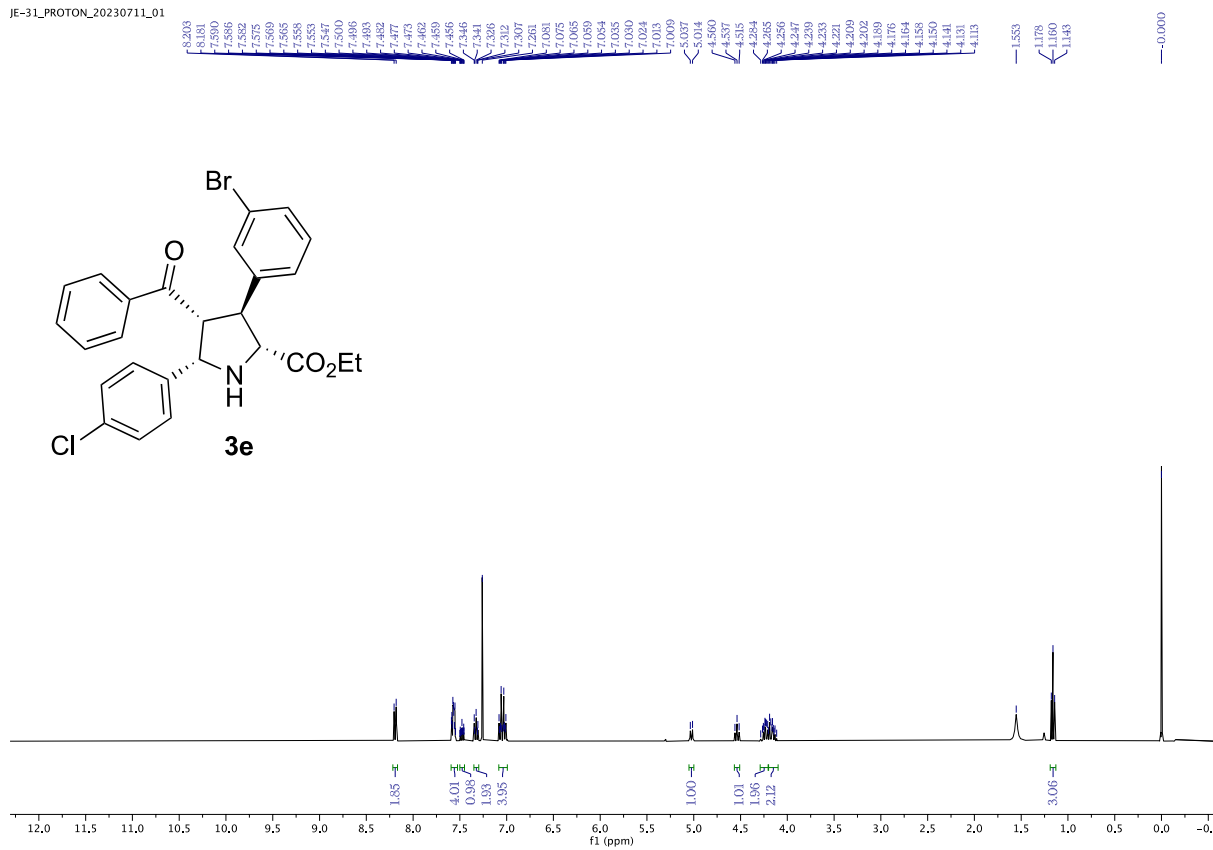

V-JE-31\_CARBON\_20230904\_01

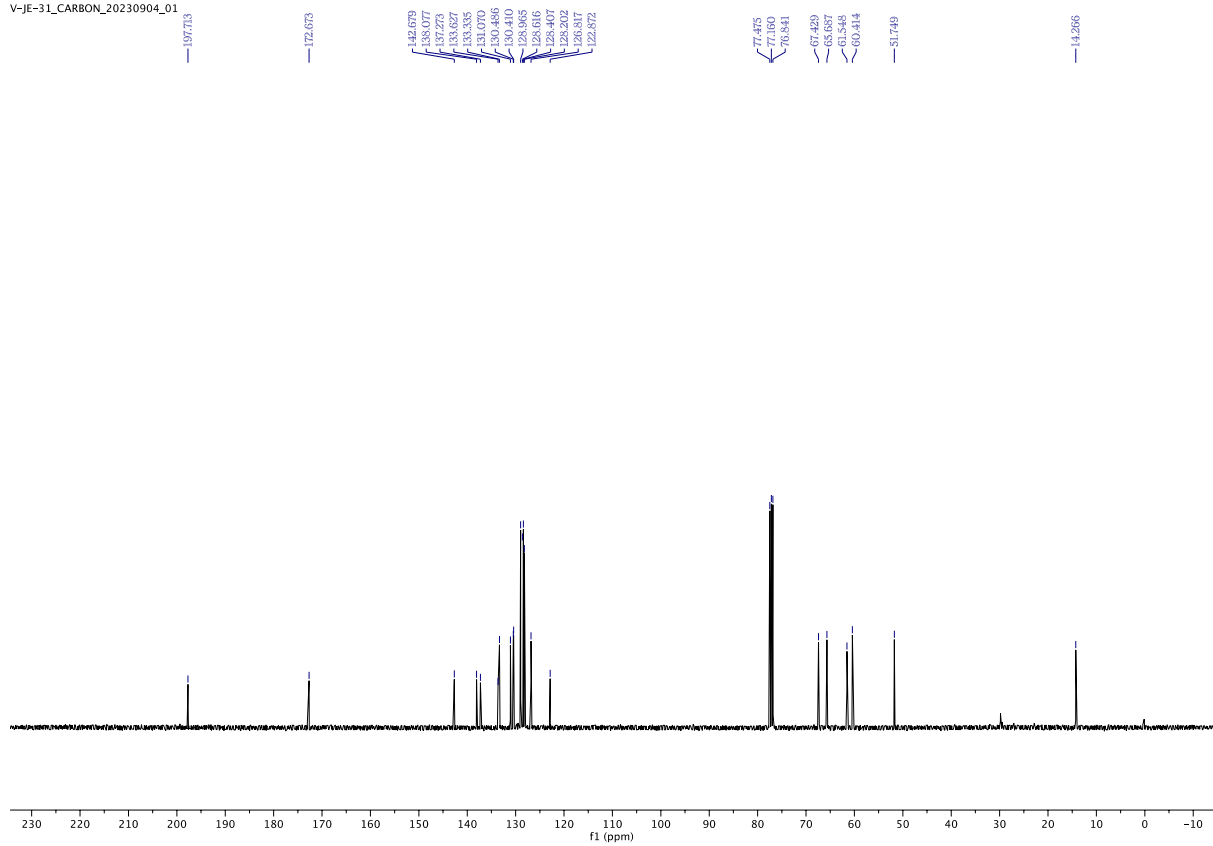

V-JE-33\_PROTON\_20230903\_01

8.187, 8.180, 8.103, 8.101, 7.867, 7.865, 7.854, 7.847, 7.796, 7.775, 7.688, 7.685, 7.672, 7.534, 7.513, 7.503, 7.499, 7.489, 7.484, 7.486, 7.483, 7.478, 7.475, 7.470, 7.453, 7.440, 7.403, 7.399, 7.388, 7.386, 7.384, 7.382, 7.360, 7.358, 7.366, 7.562, 7.233, 7.231, 7.220, 7.220, 7.215, 7.212, 7.201, 7.198, 7.196, 7.132, 7.132, 7.116, 7.116, 7.104, 7.067, 7.061, 7.056, 7.048, 7.039, 7.033, 5.045, 5.041, 5.024, 5.005, 5.005, 4.610, 4.595, 4.595, 4.579, 4.572, 4.324, 4.324, 4.304, 4.130, 4.121, 4.118, 4.118, 4.112, 4.112, 4.095, 4.095, 4.091, 4.083, 4.077, 4.074, 4.068, 4.068, 4.048, 4.048, 0.924, 0.912, 0.000

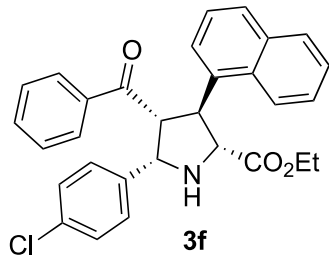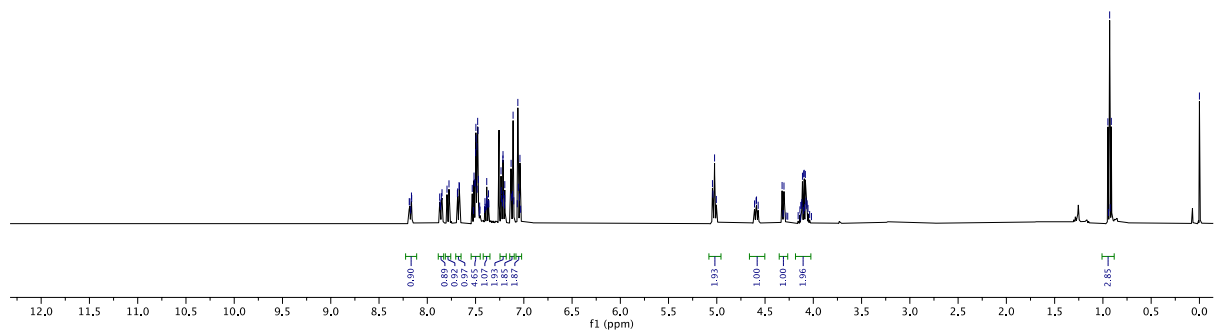

V-JE-33 CARBON\_20230903\_01

199.48, 173.500, 137.607, 137.444, 137.442, 133.540, 133.540, 133.073, 132.201, 129.014, 128.915, 128.441, 128.418, 128.385, 127.887, 126.506, 125.945, 125.584, 123.361, 77.479, 77.190, 76.845, 67.907, 66.287, 61.533, 60.535, 13.917

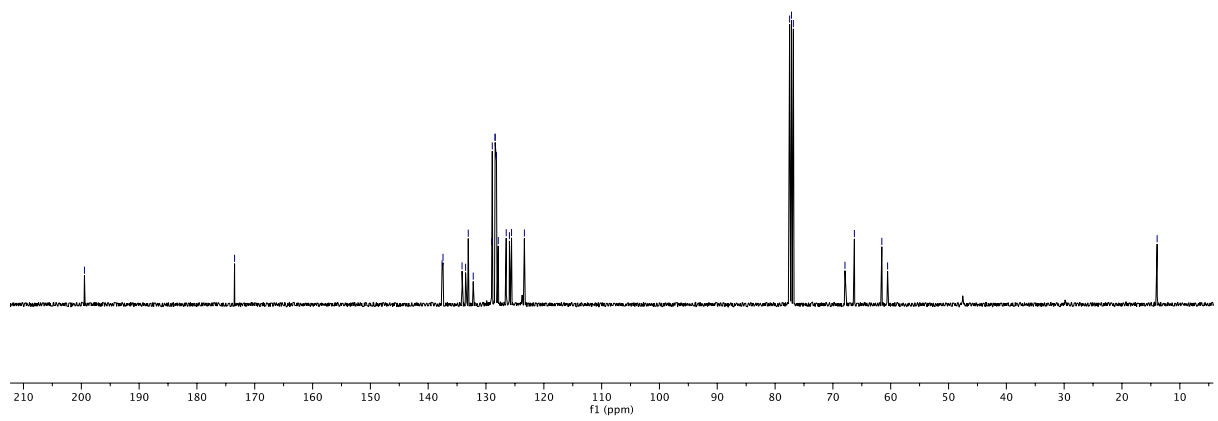

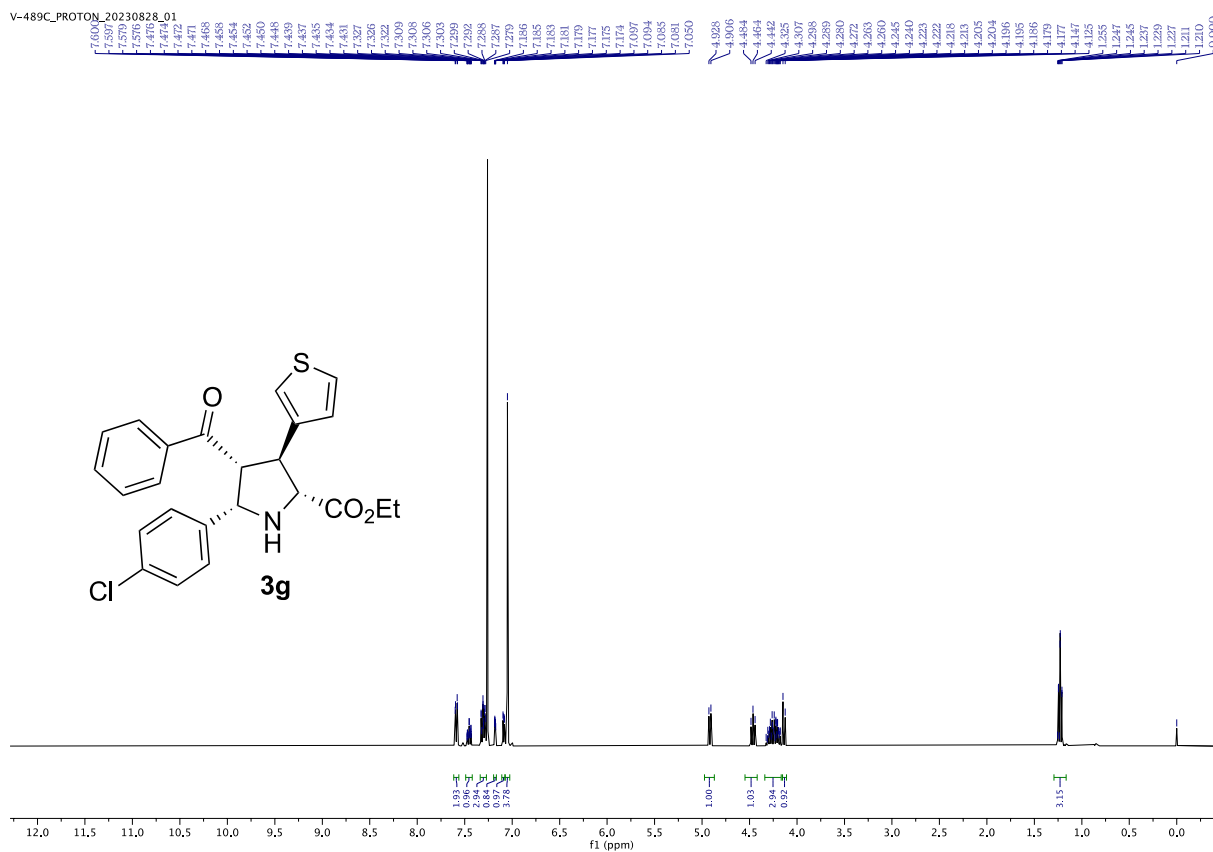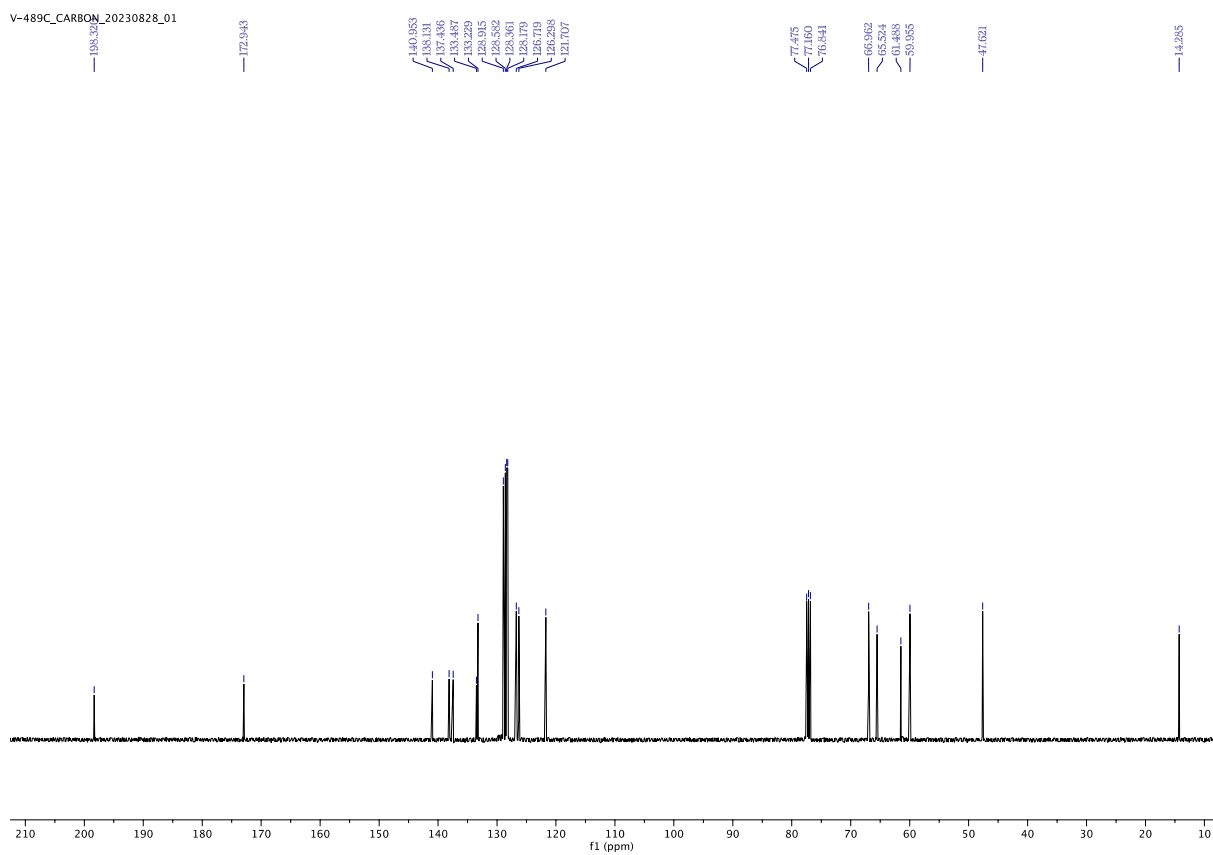



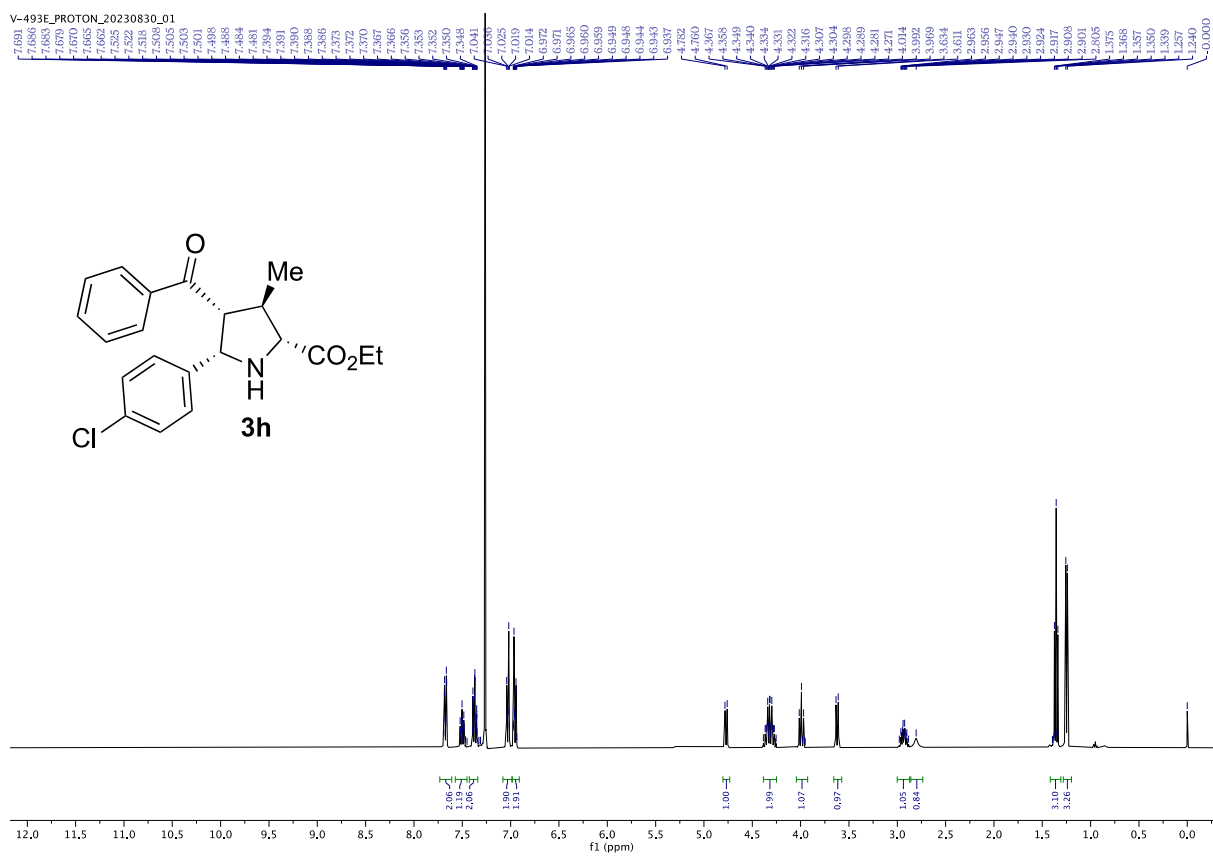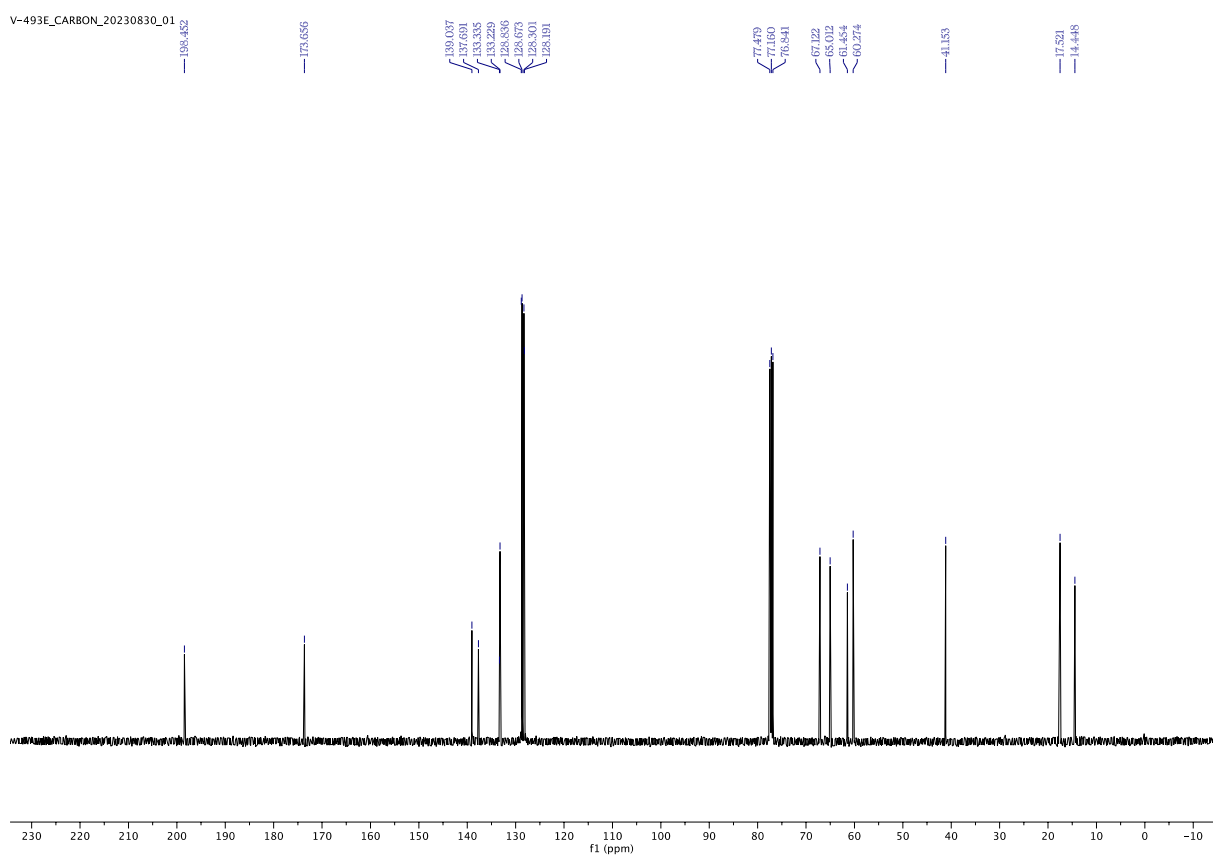

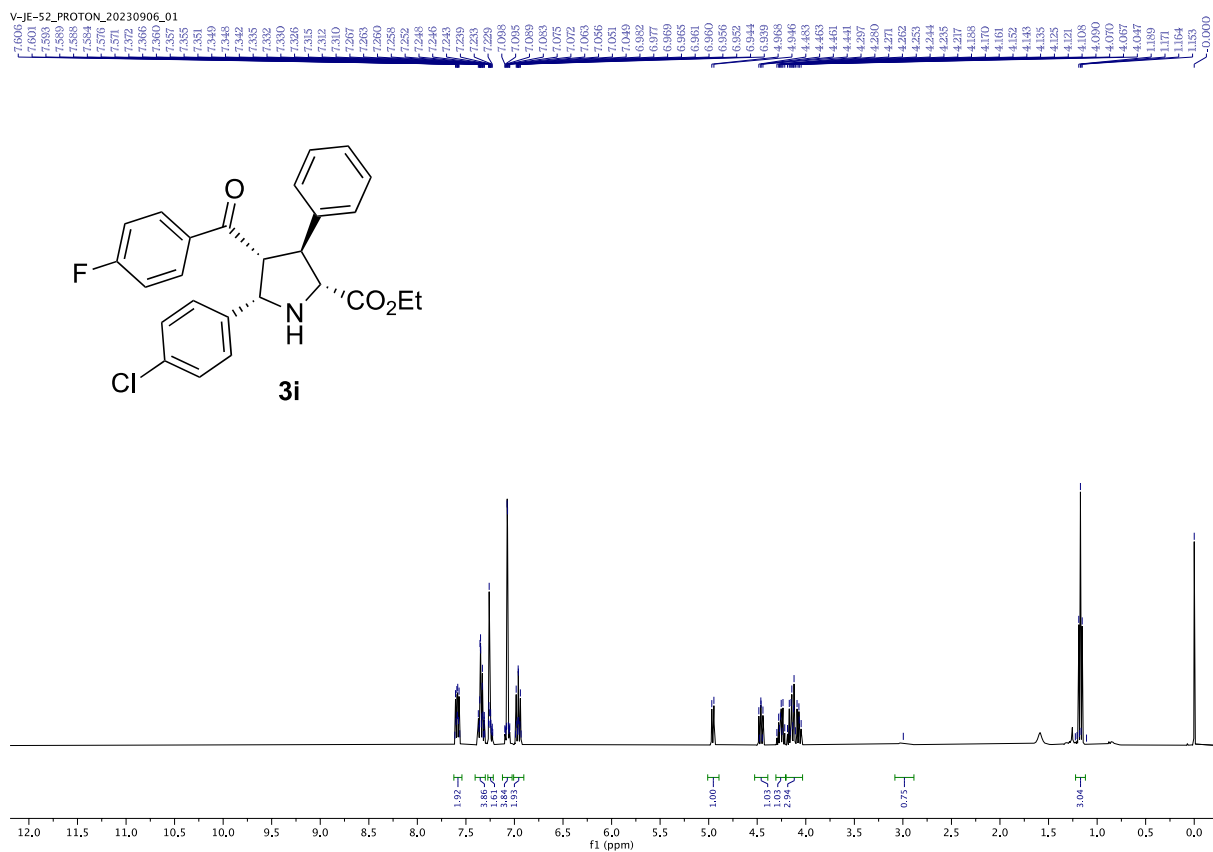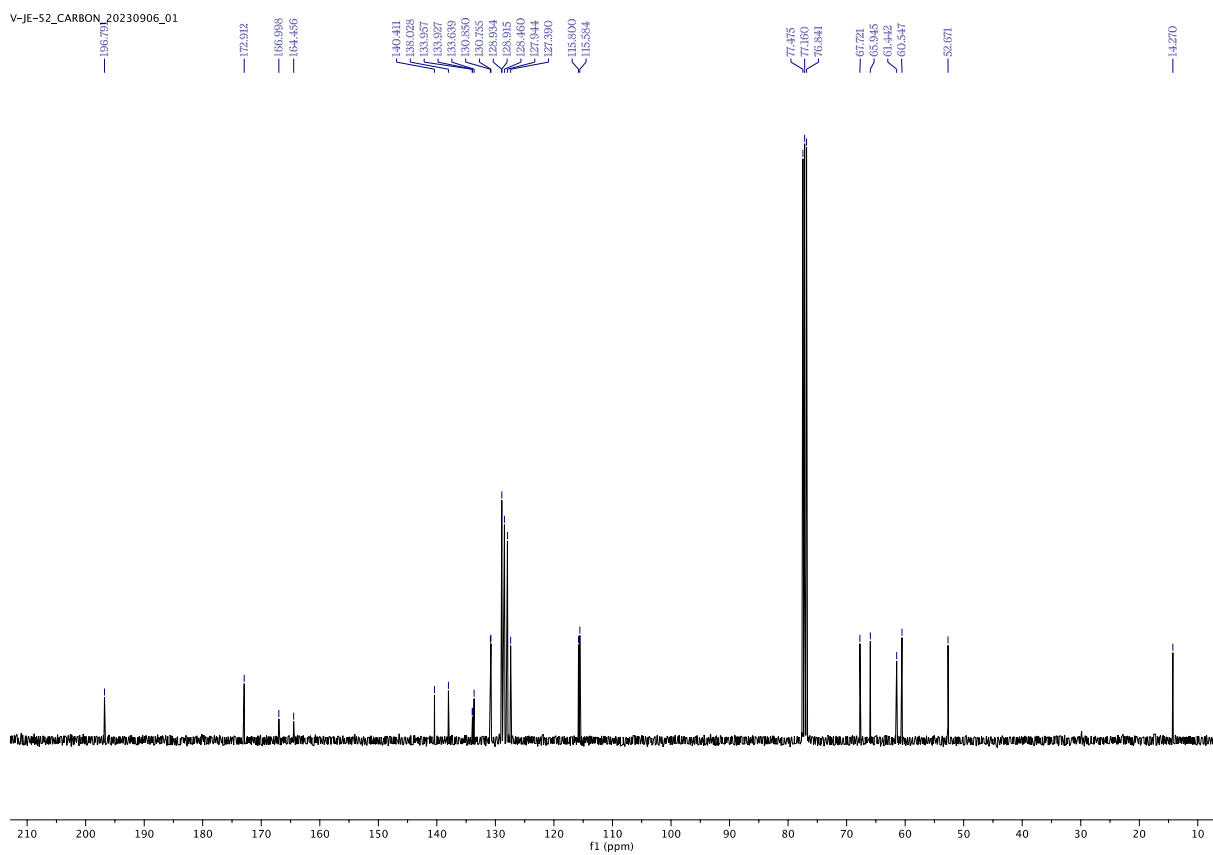

V-JE-52\_FLUORINE\_20230906\_01

-104.808

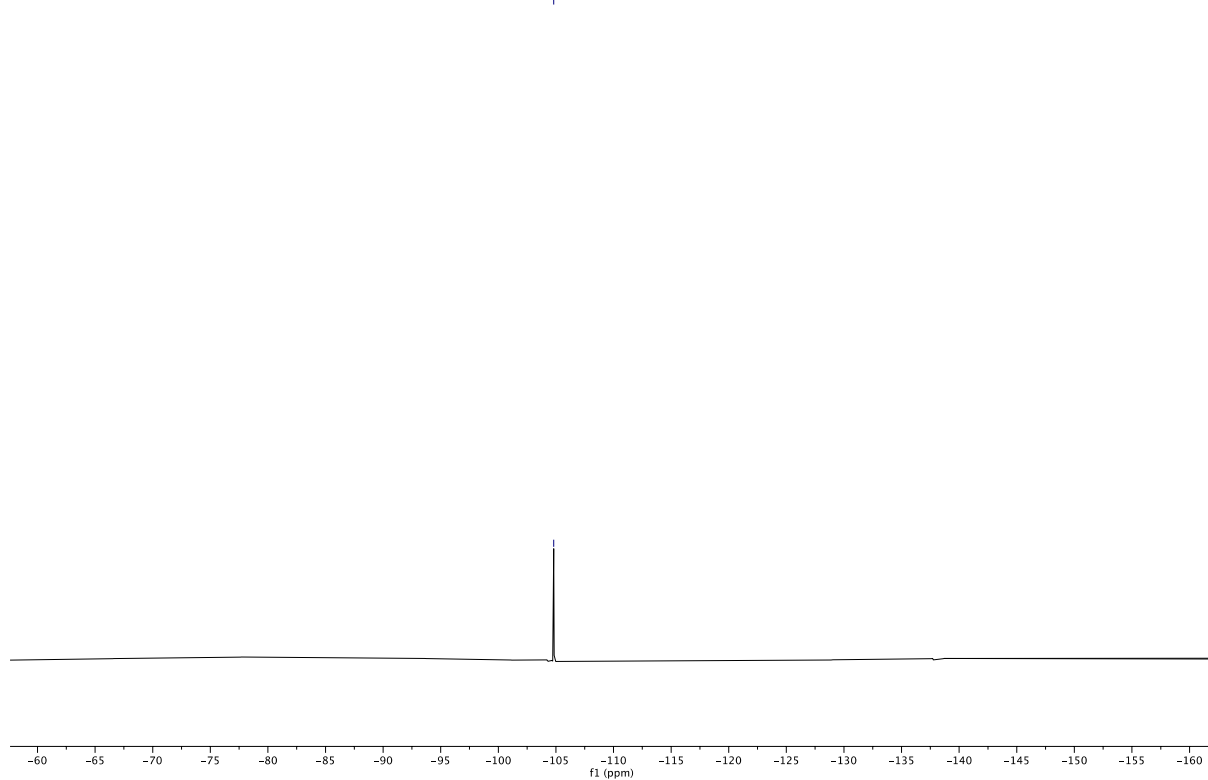

V-JE-54\_PROTON\_20230903\_01

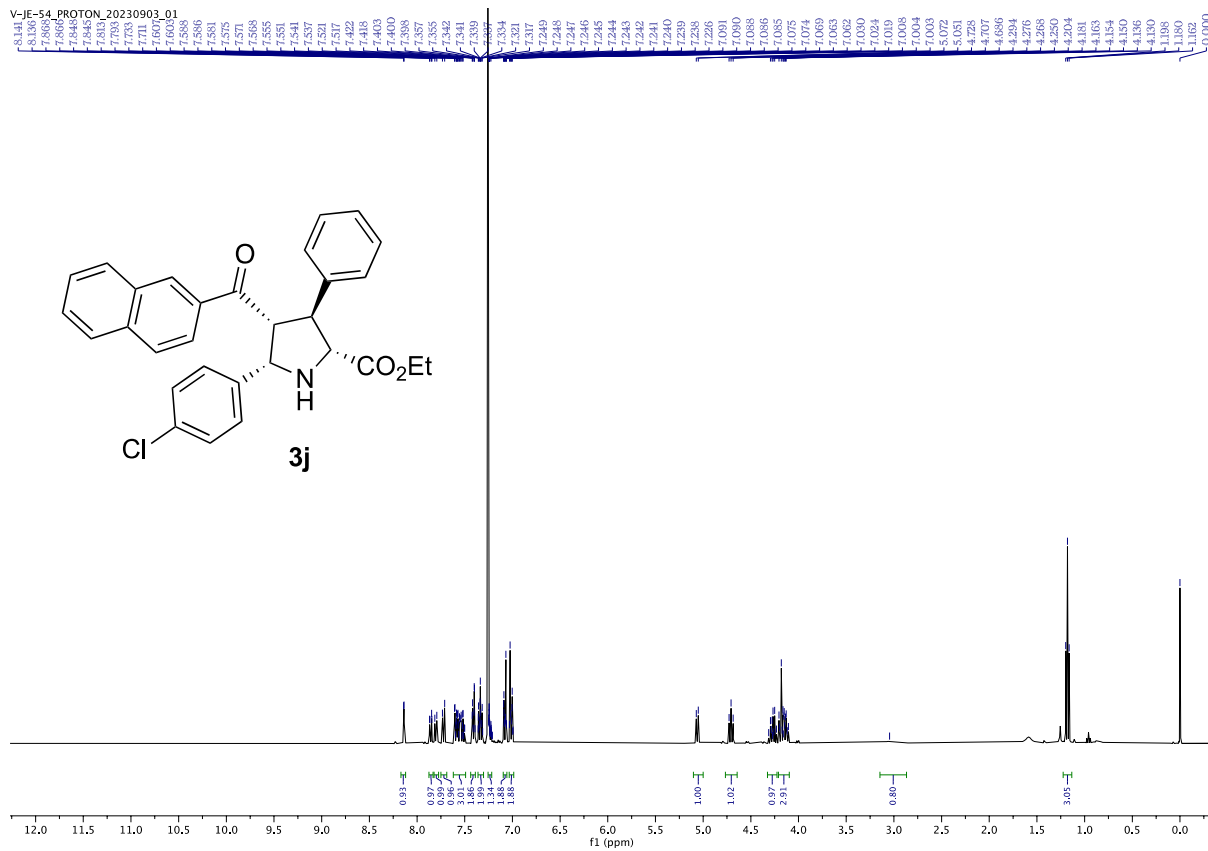

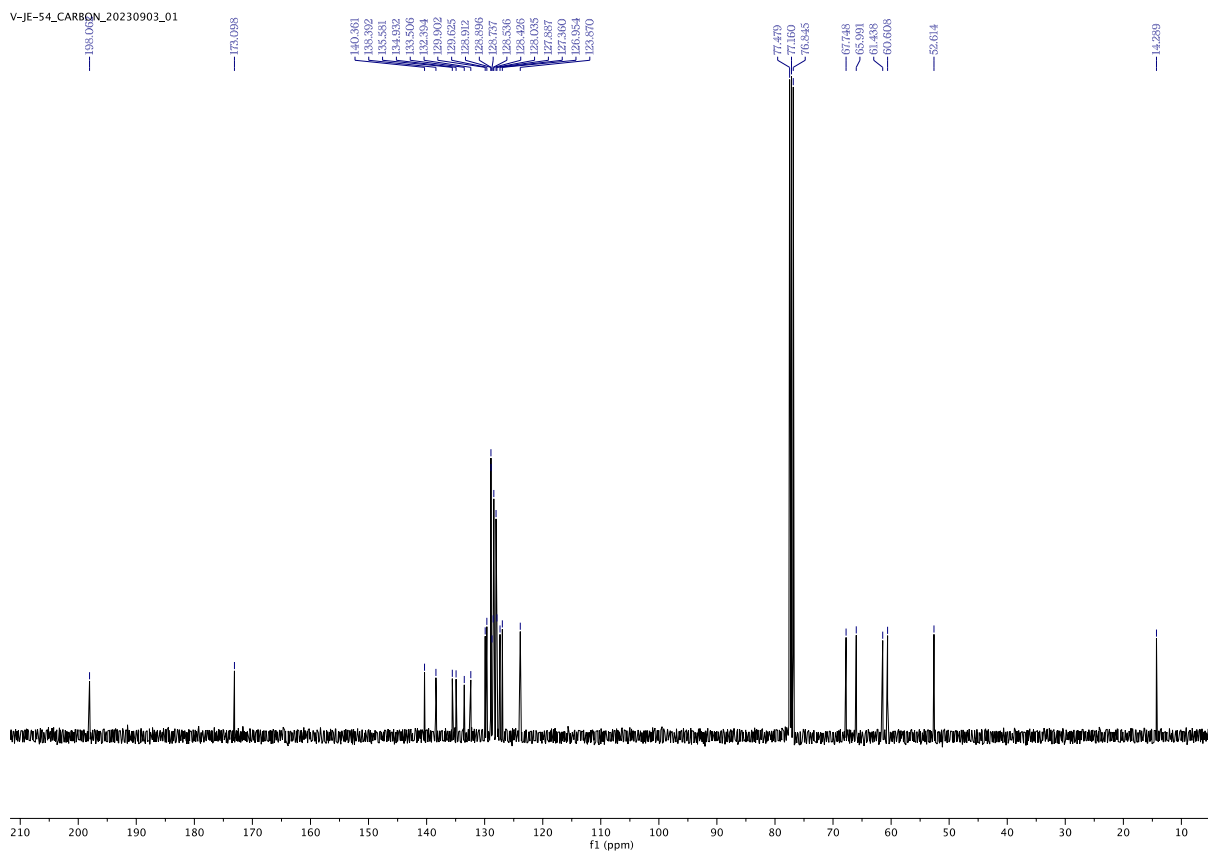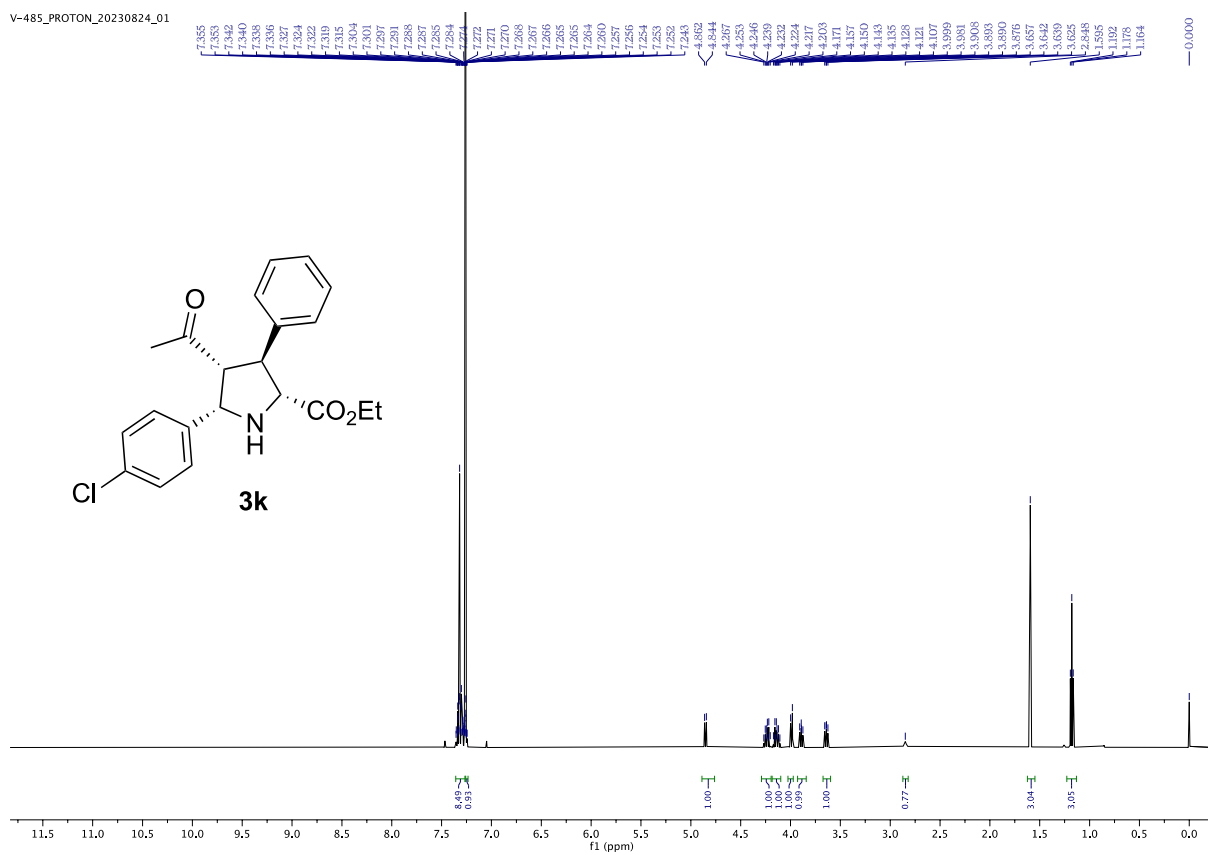

V-485\_CARBON\_20230824\_01

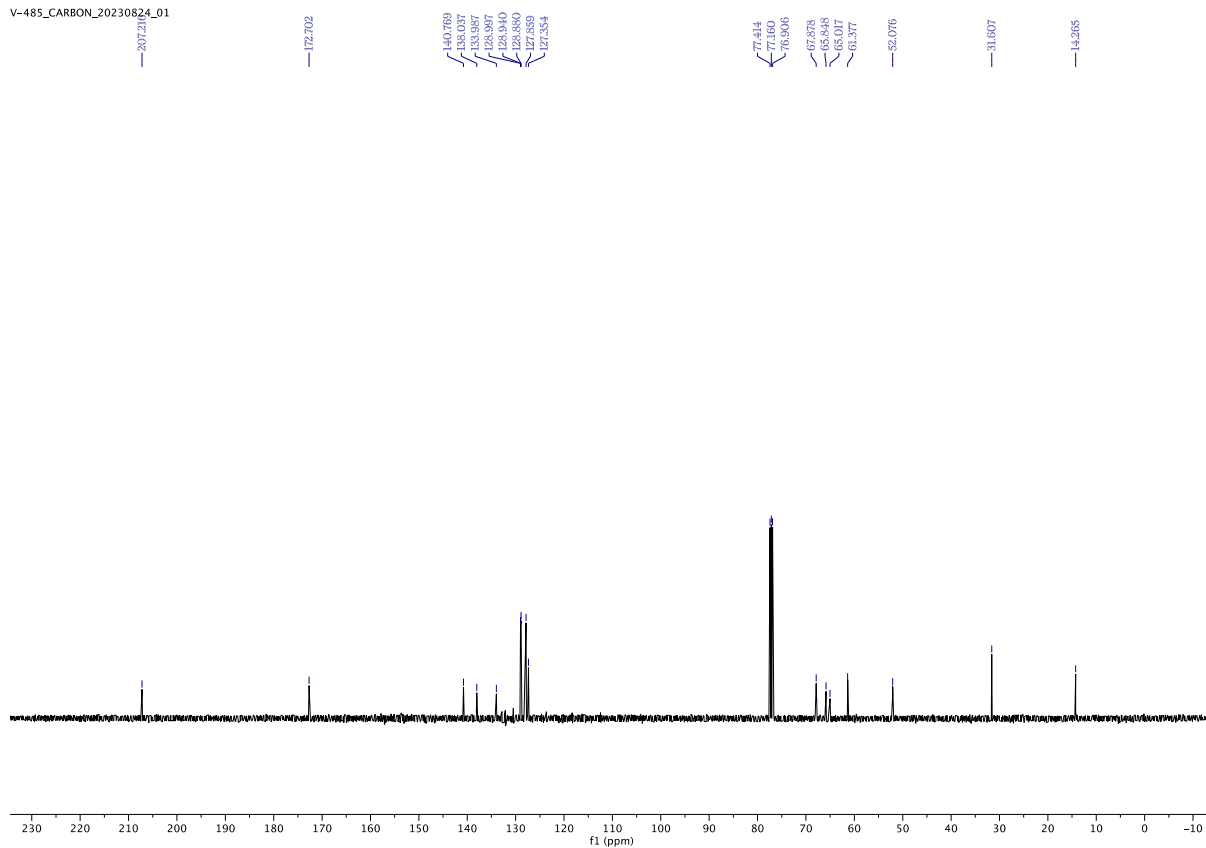

JE-39\_3\_PROTON\_20230818\_01

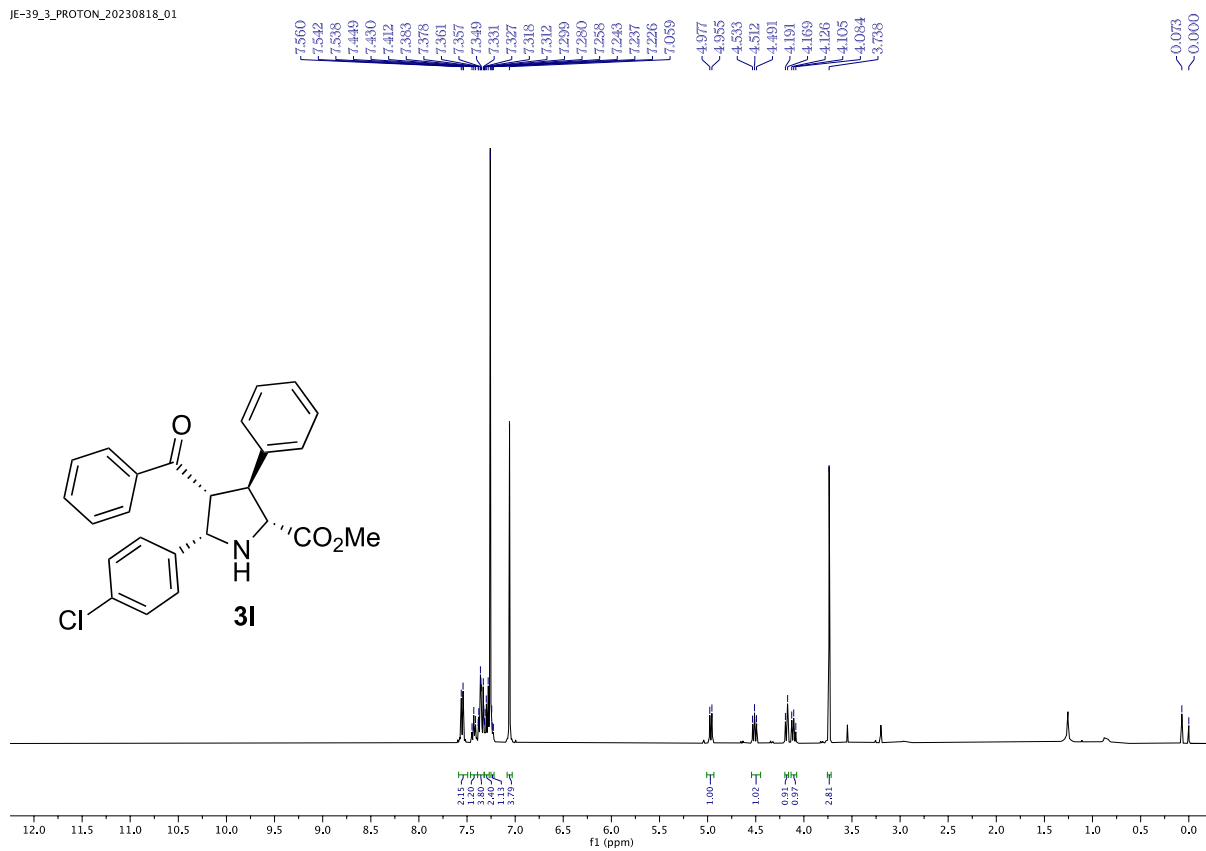

JE-39\_CARBON\_20230731\_01

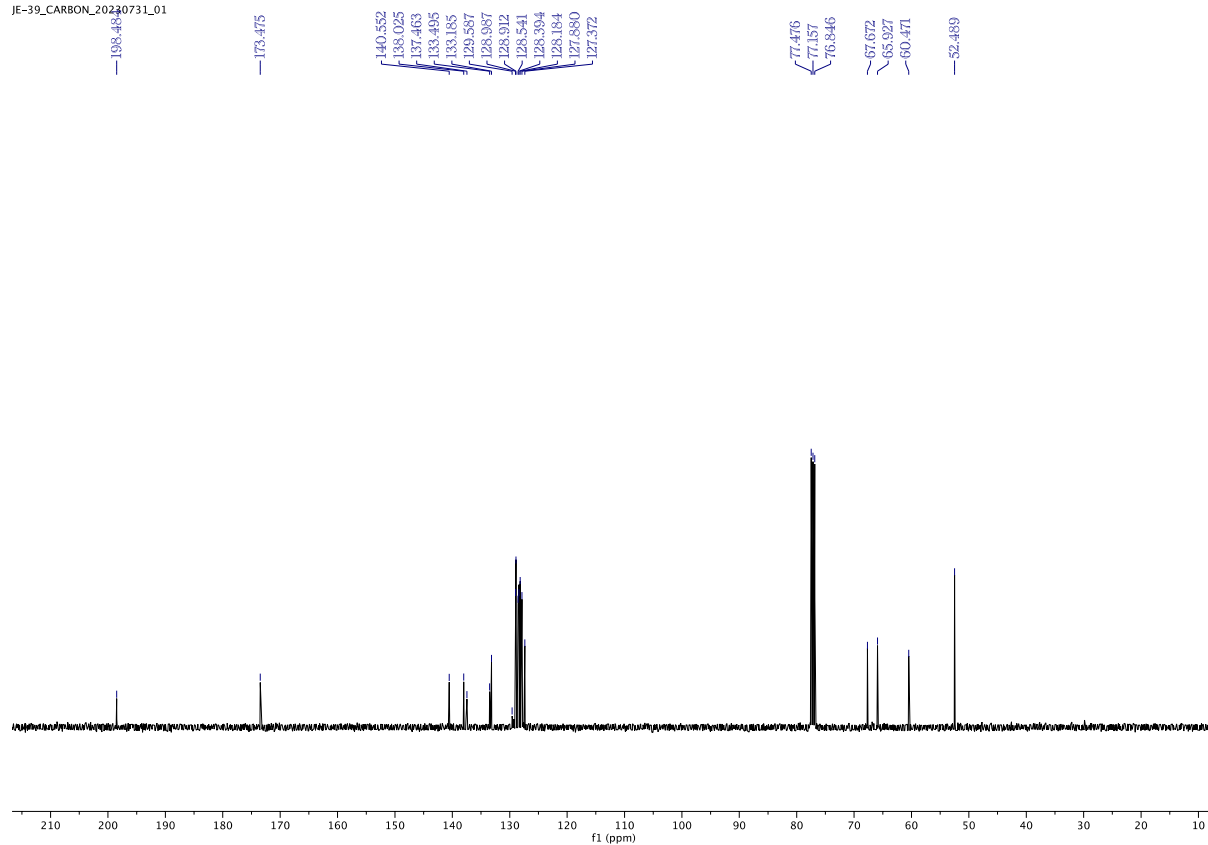

V-479A\_PROTON\_20230810\_01

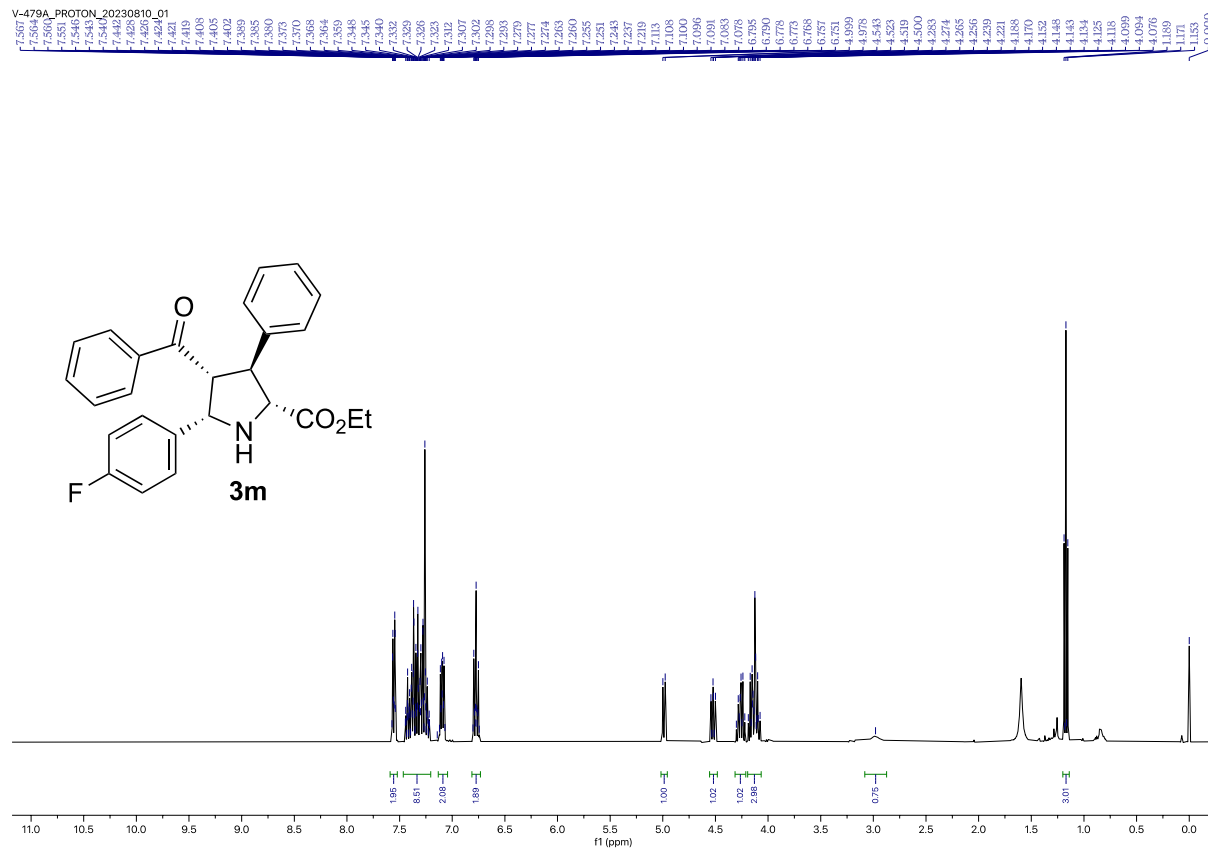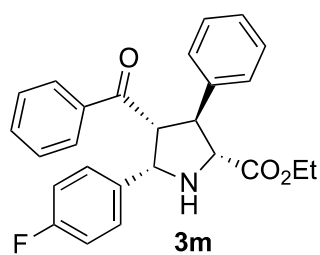

V-479A\_CARBON\_20230810\_01

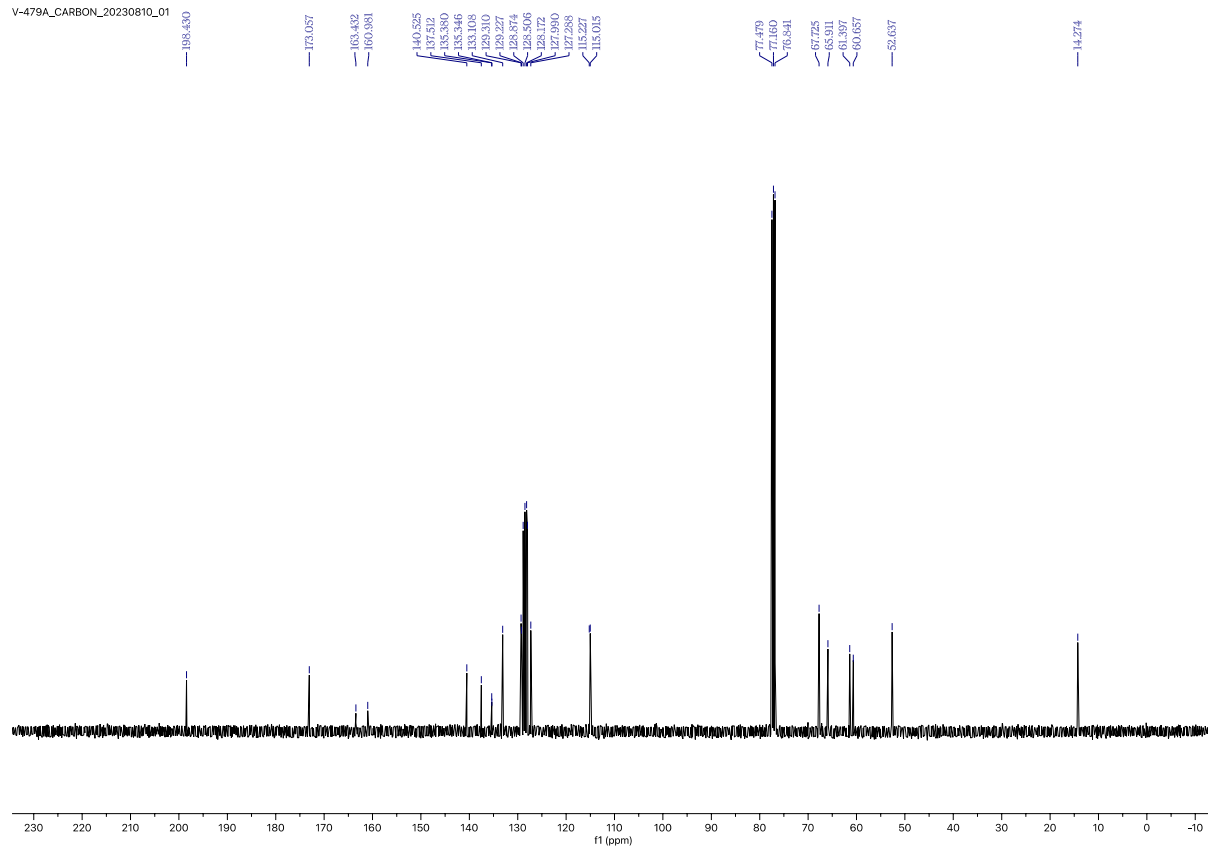

V-479A\_FLUORINE\_20230810\_01

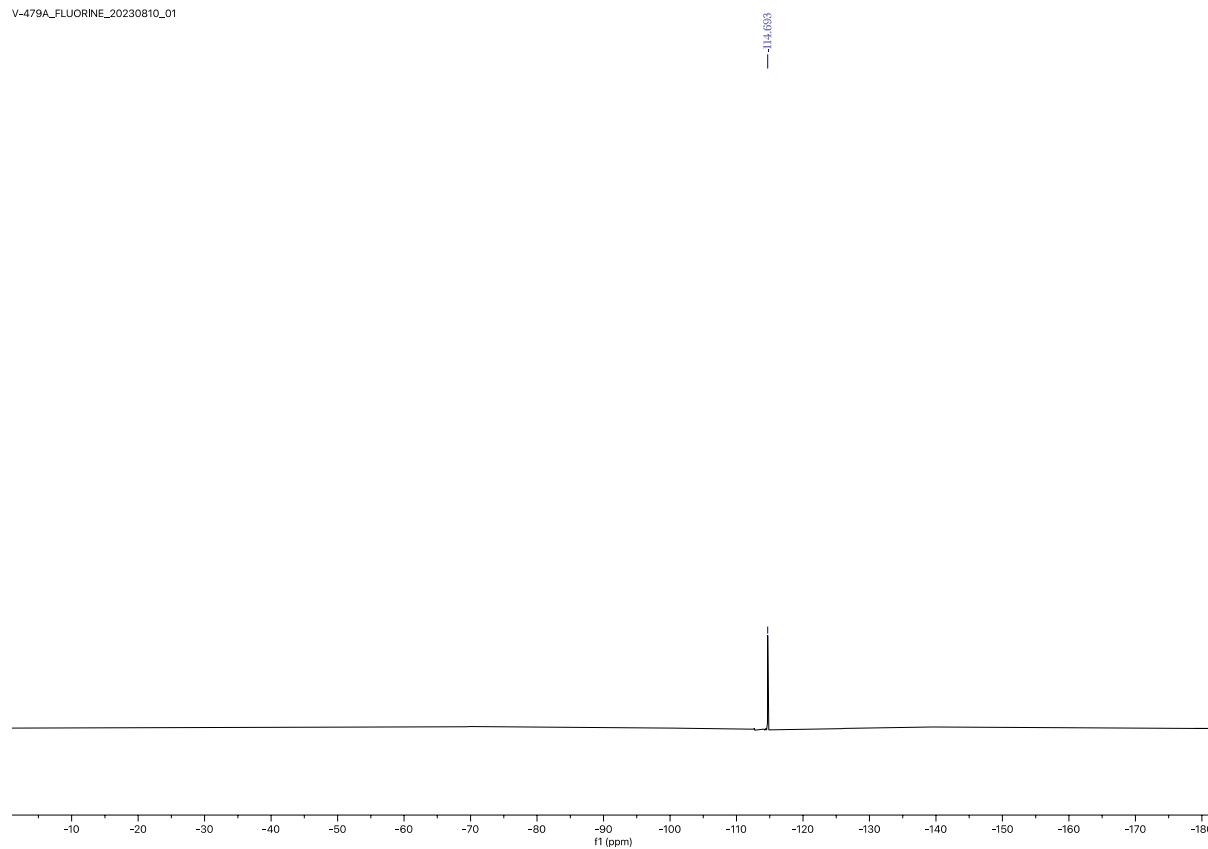

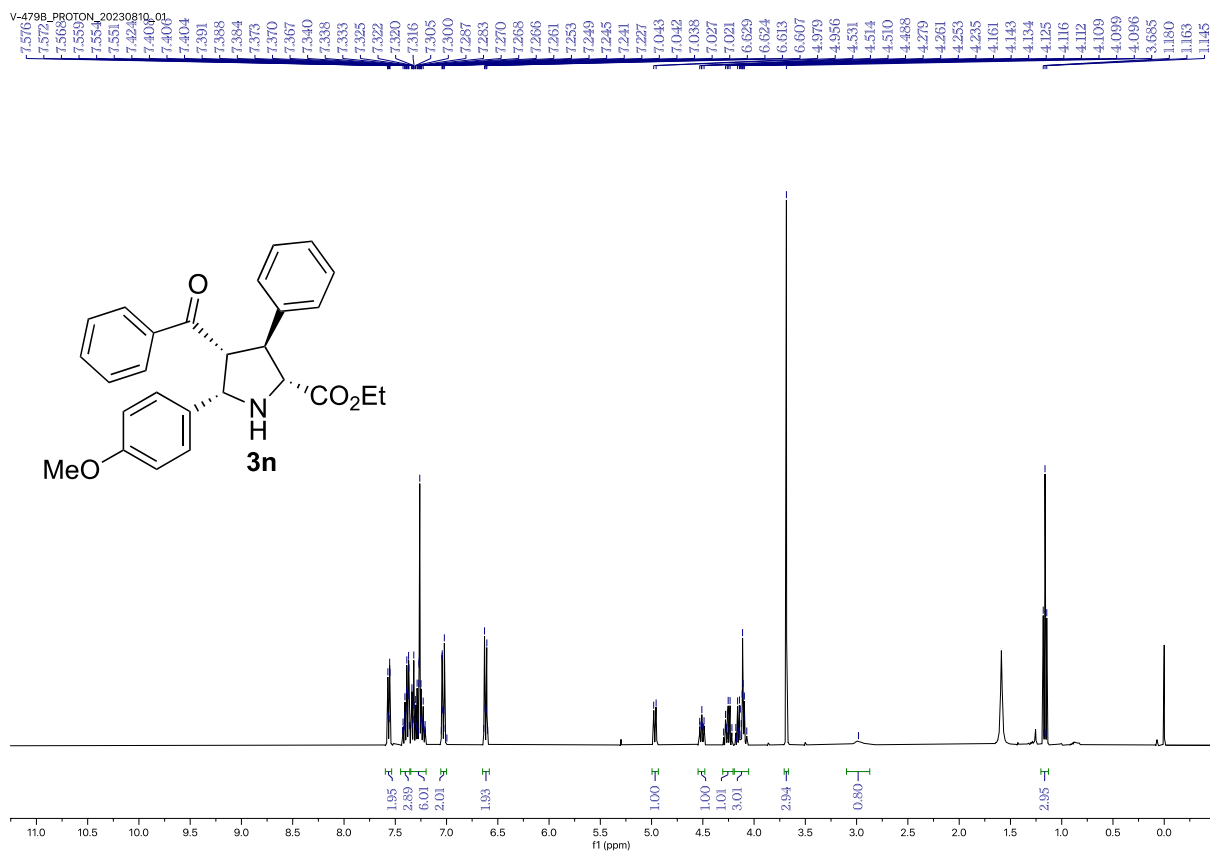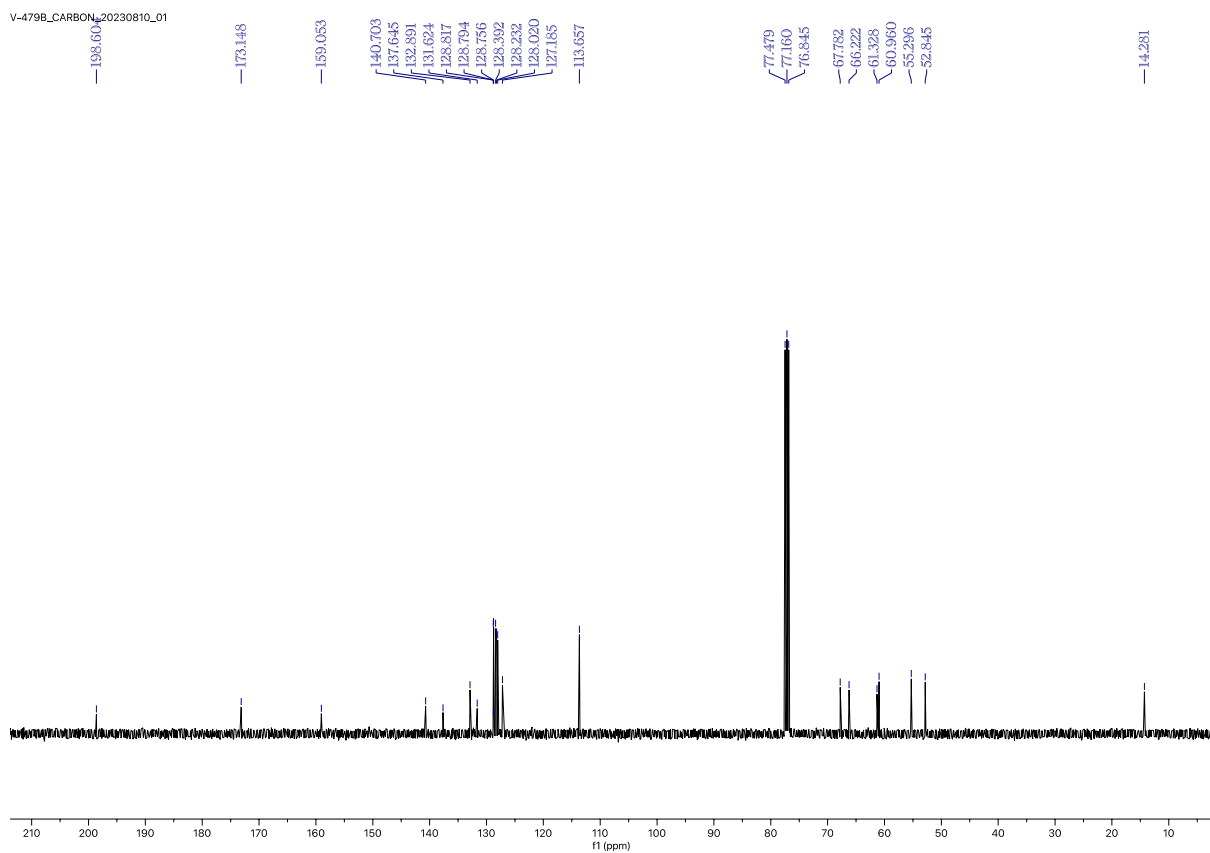



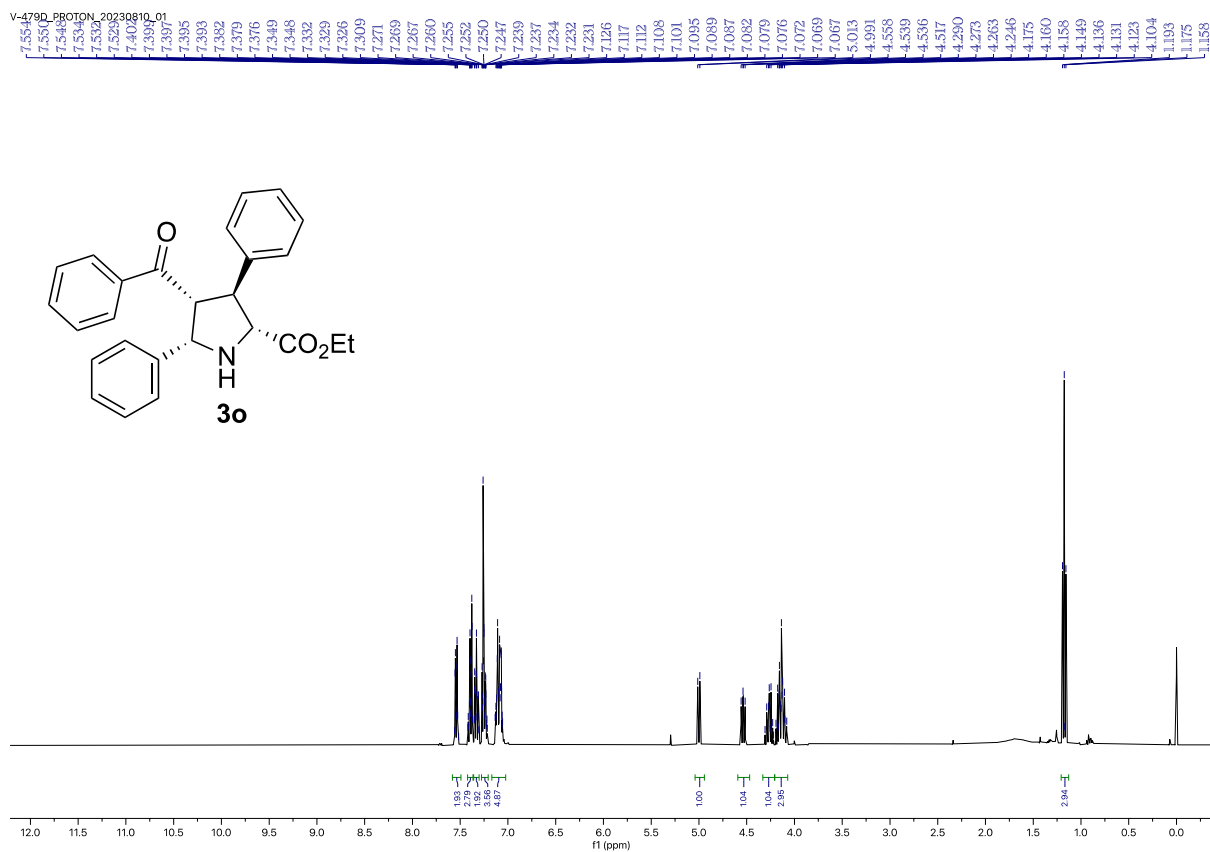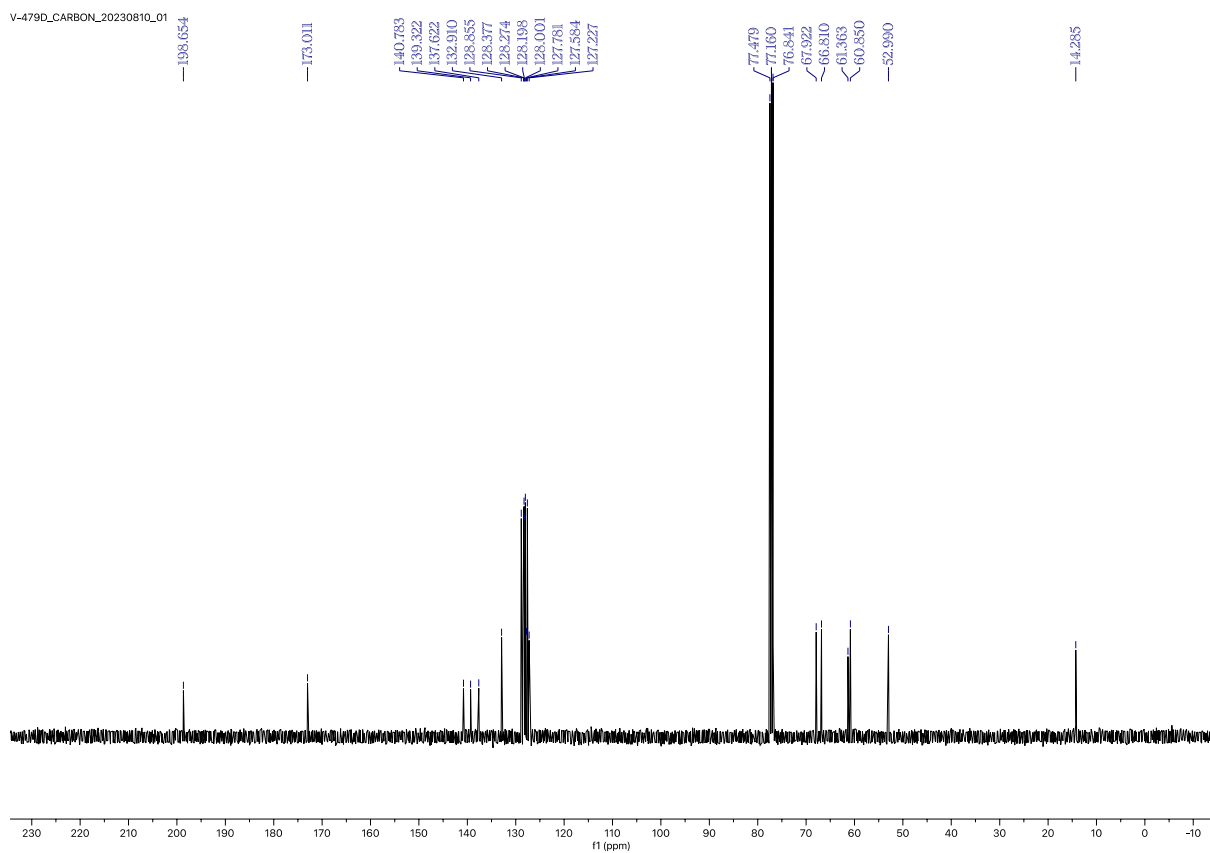

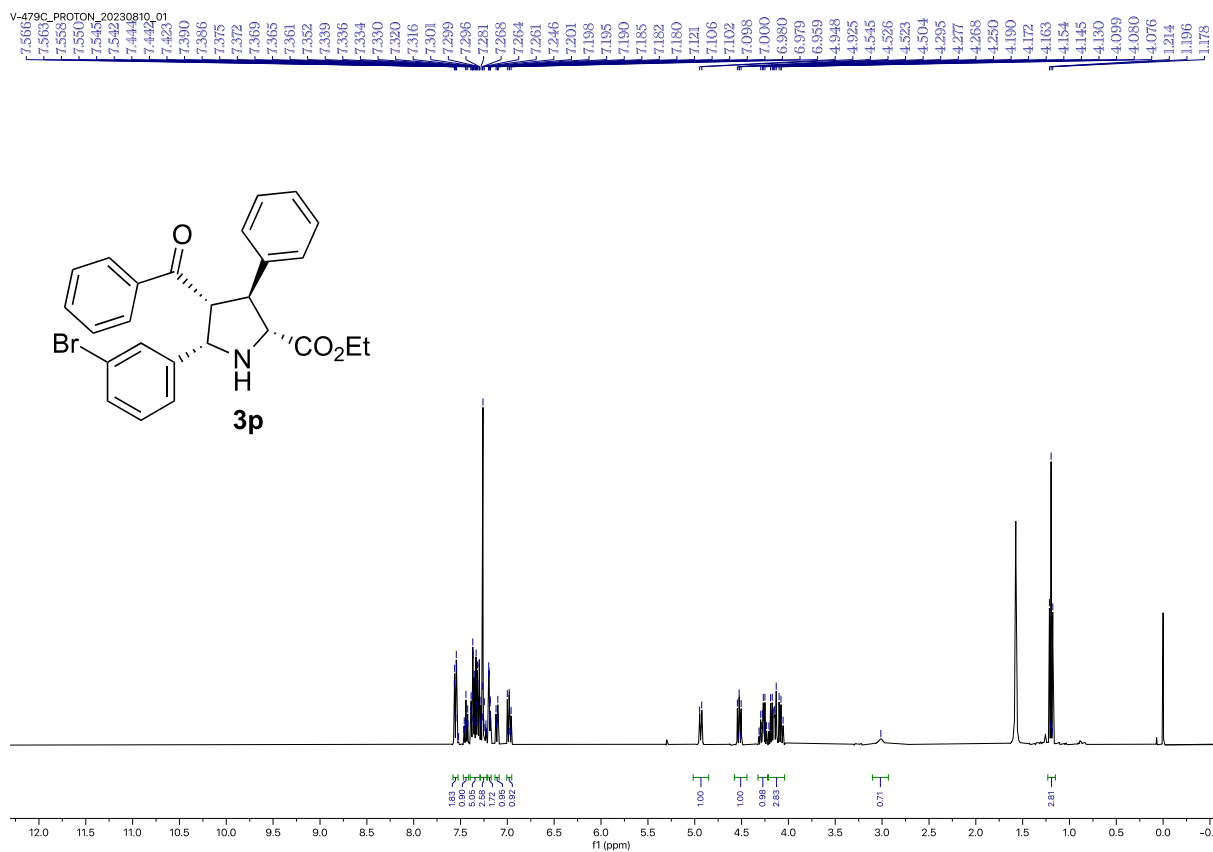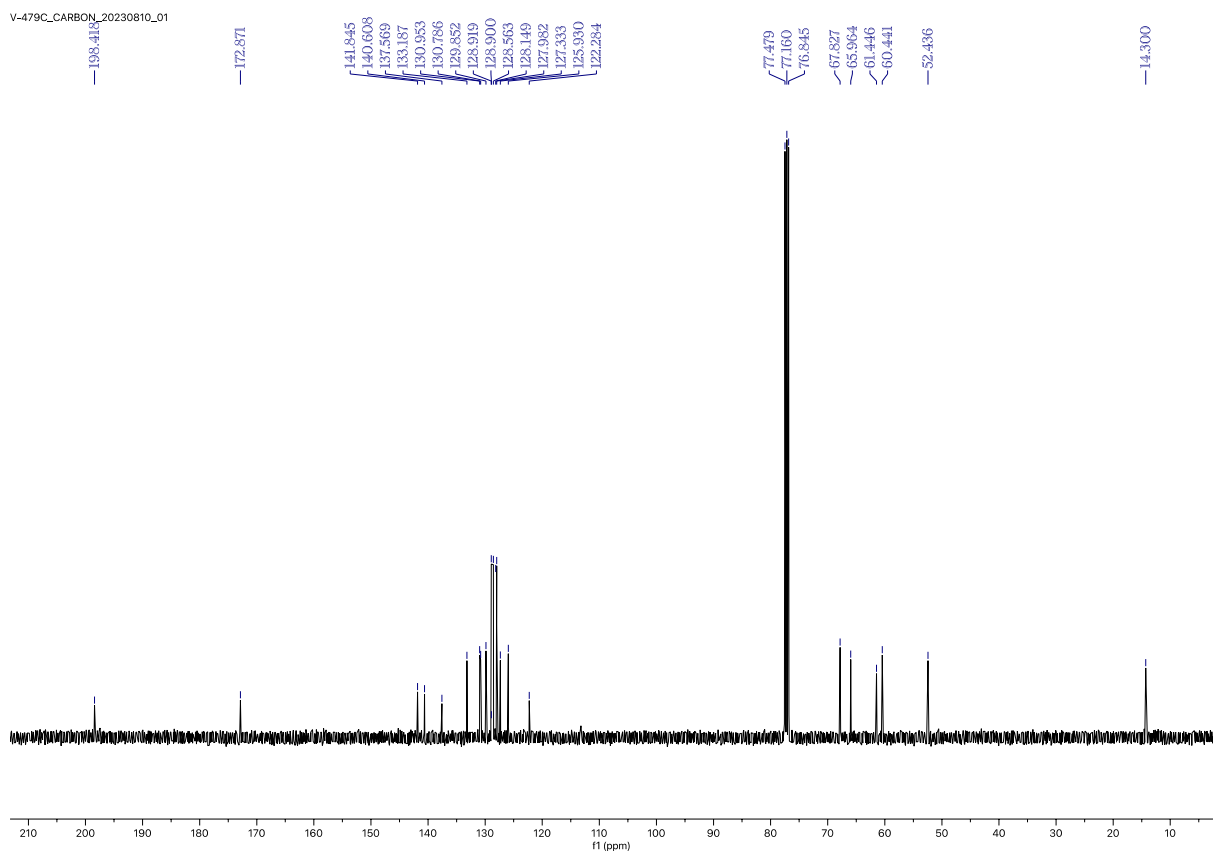

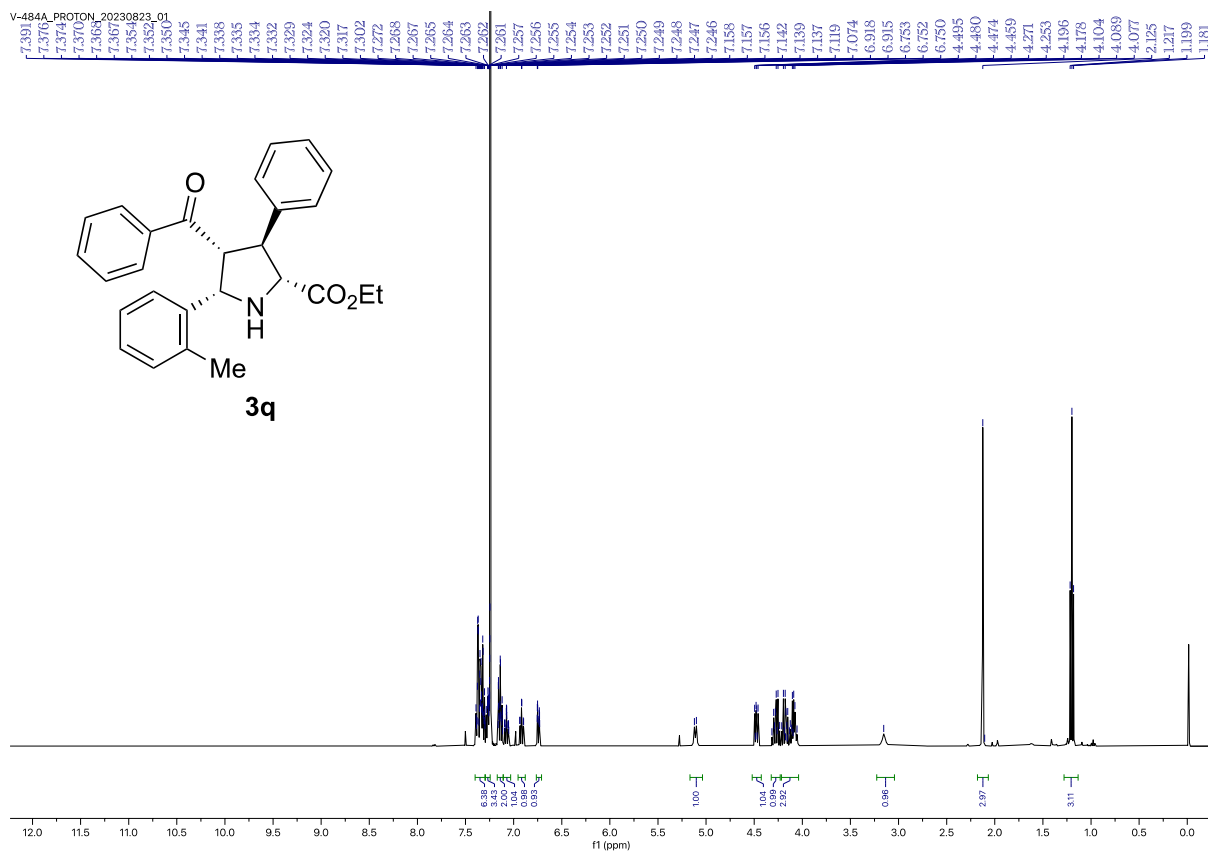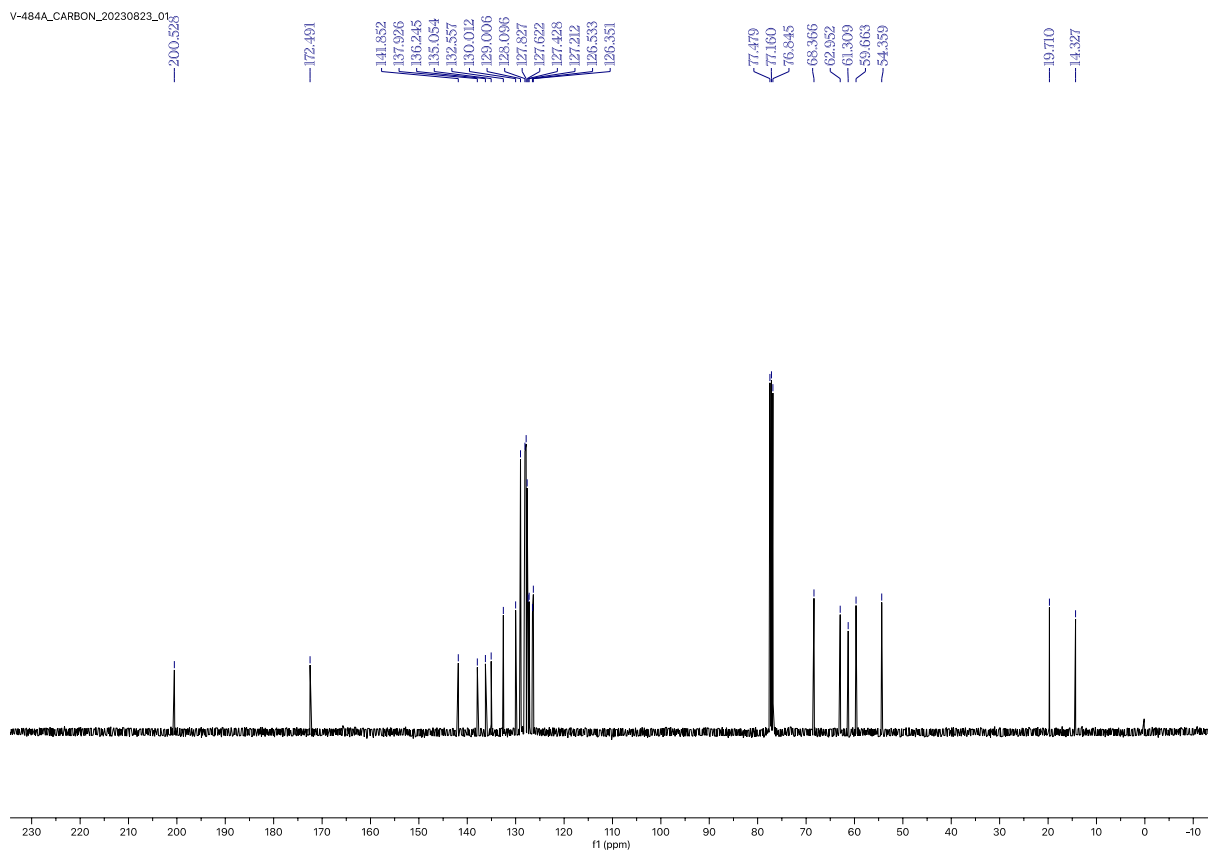

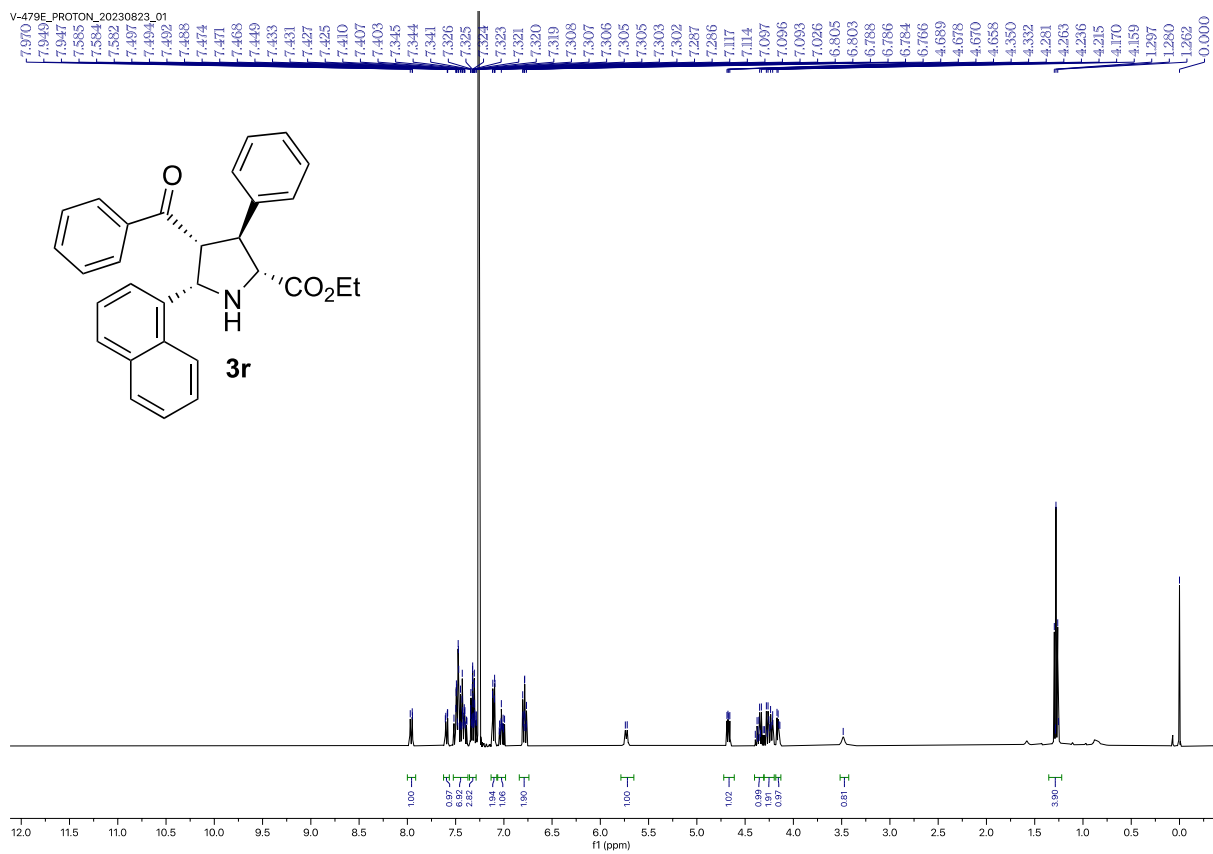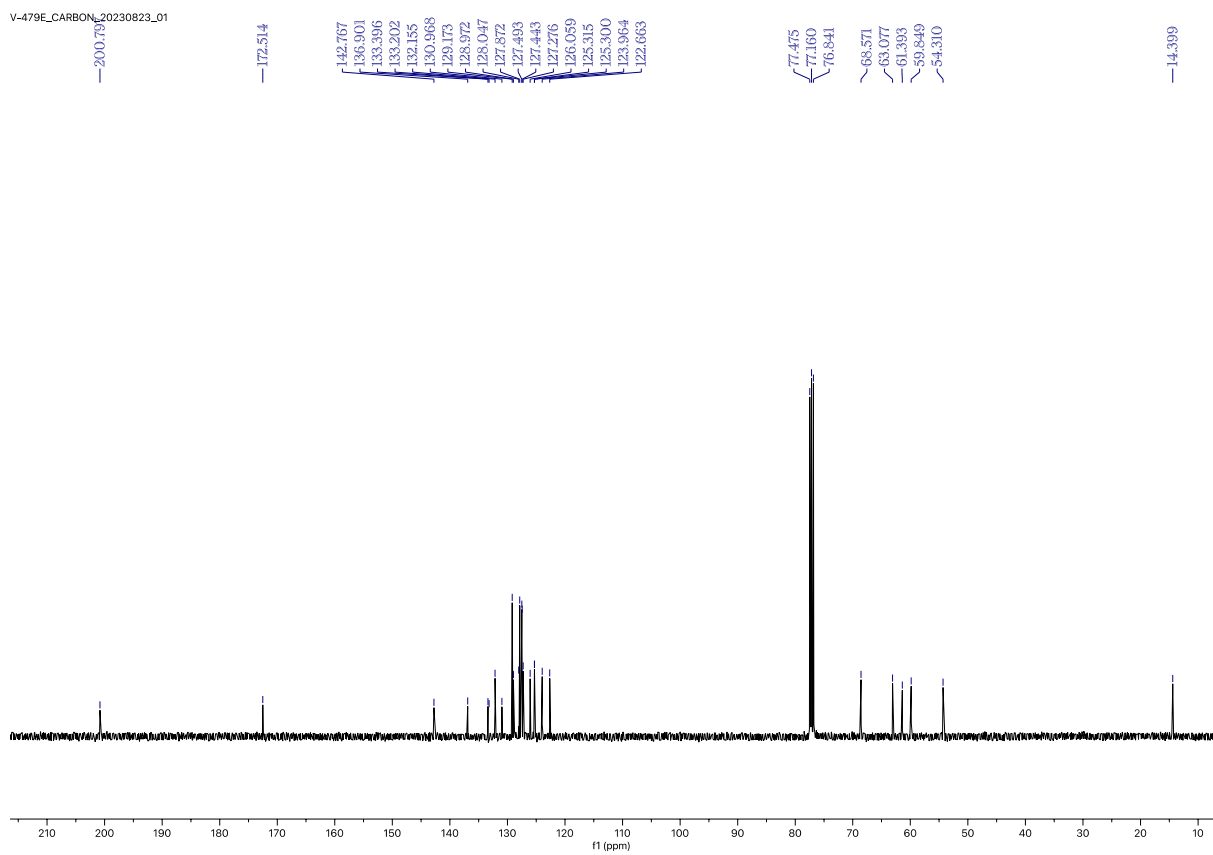

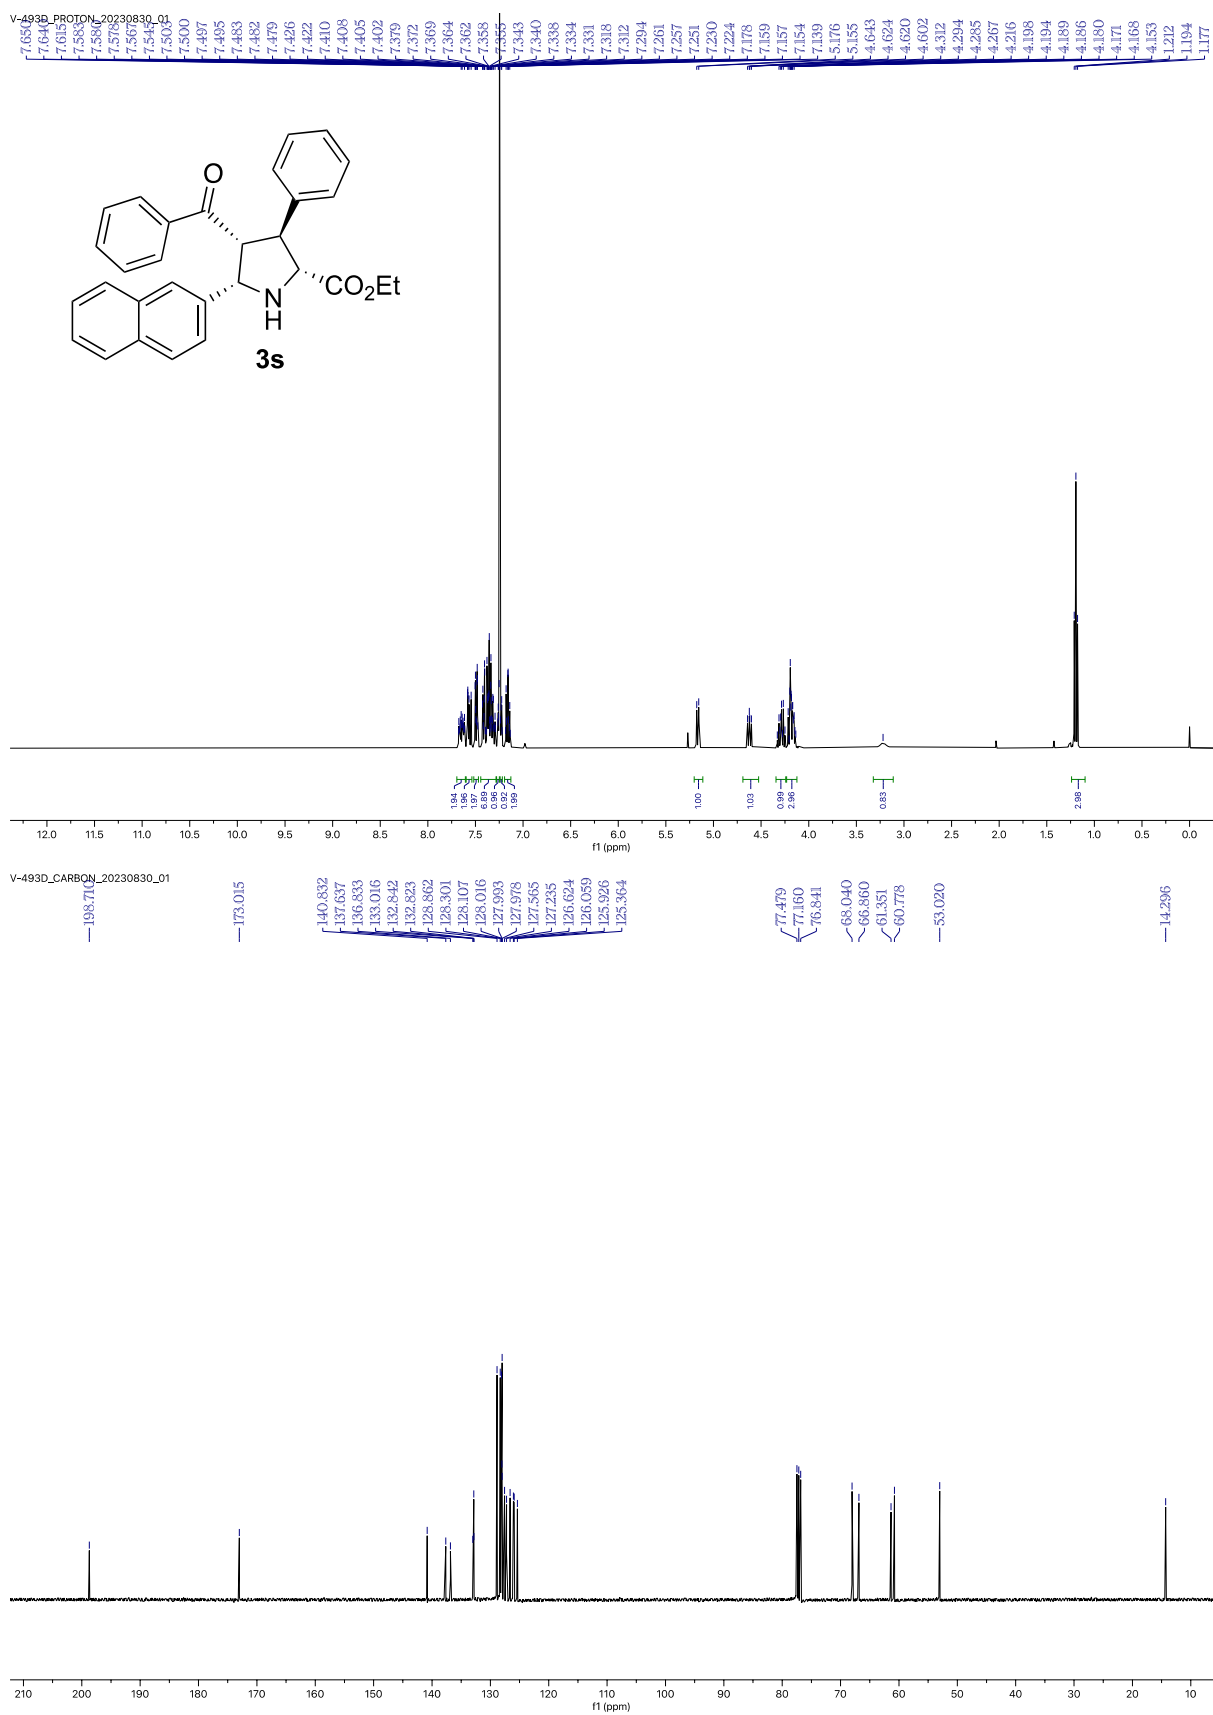

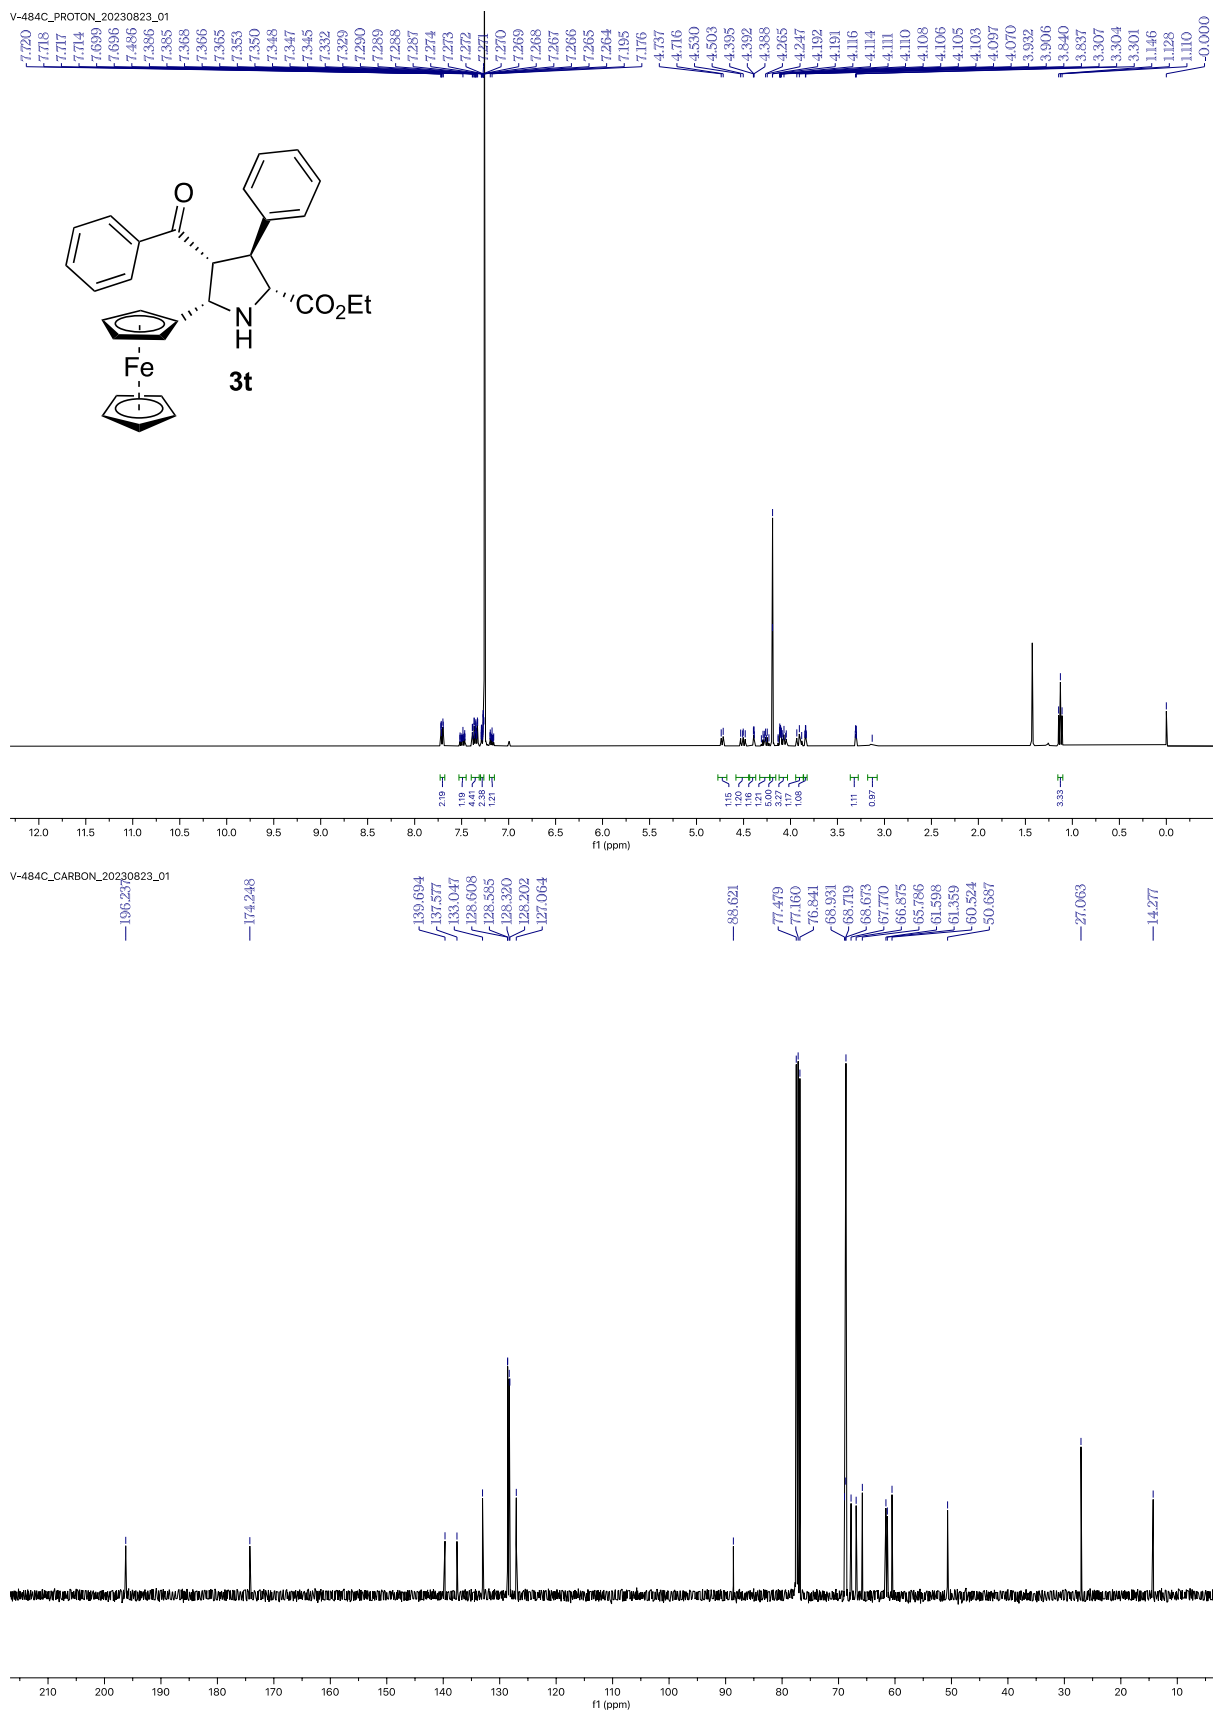

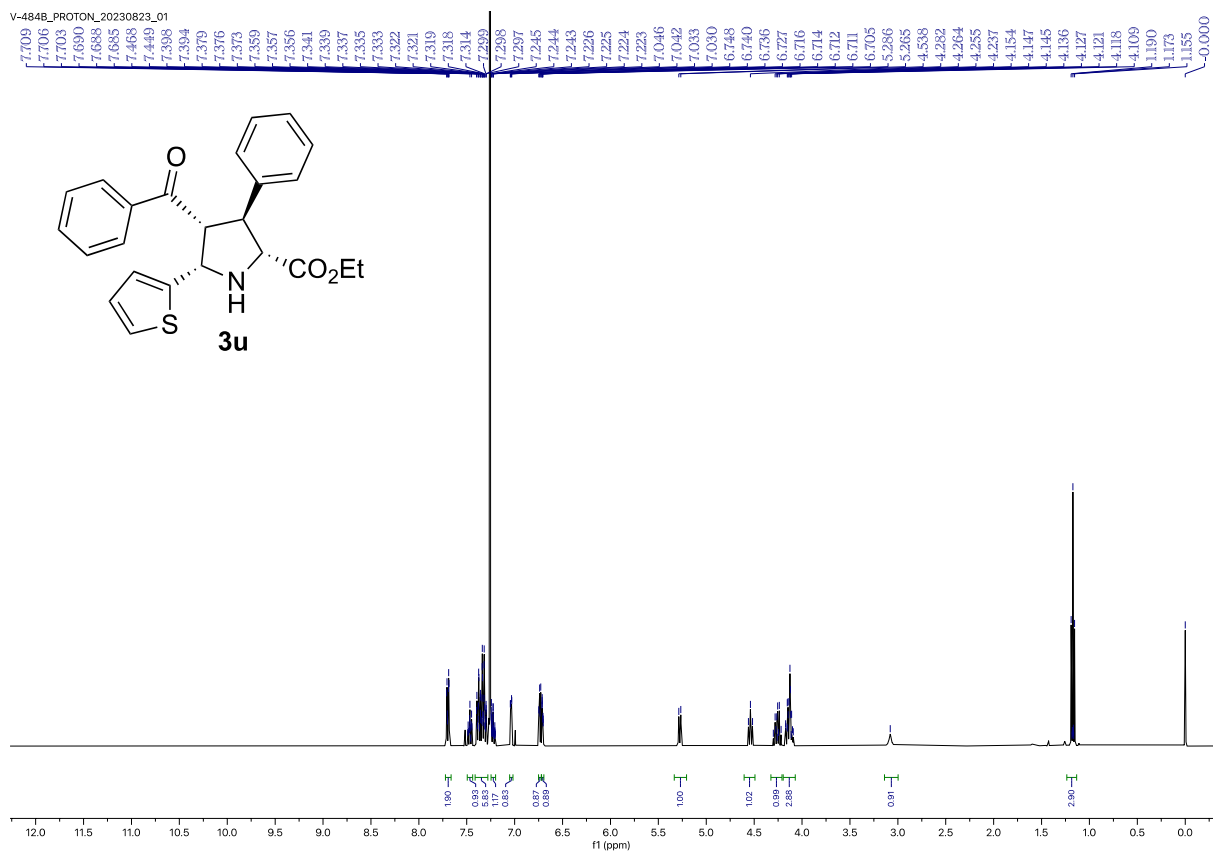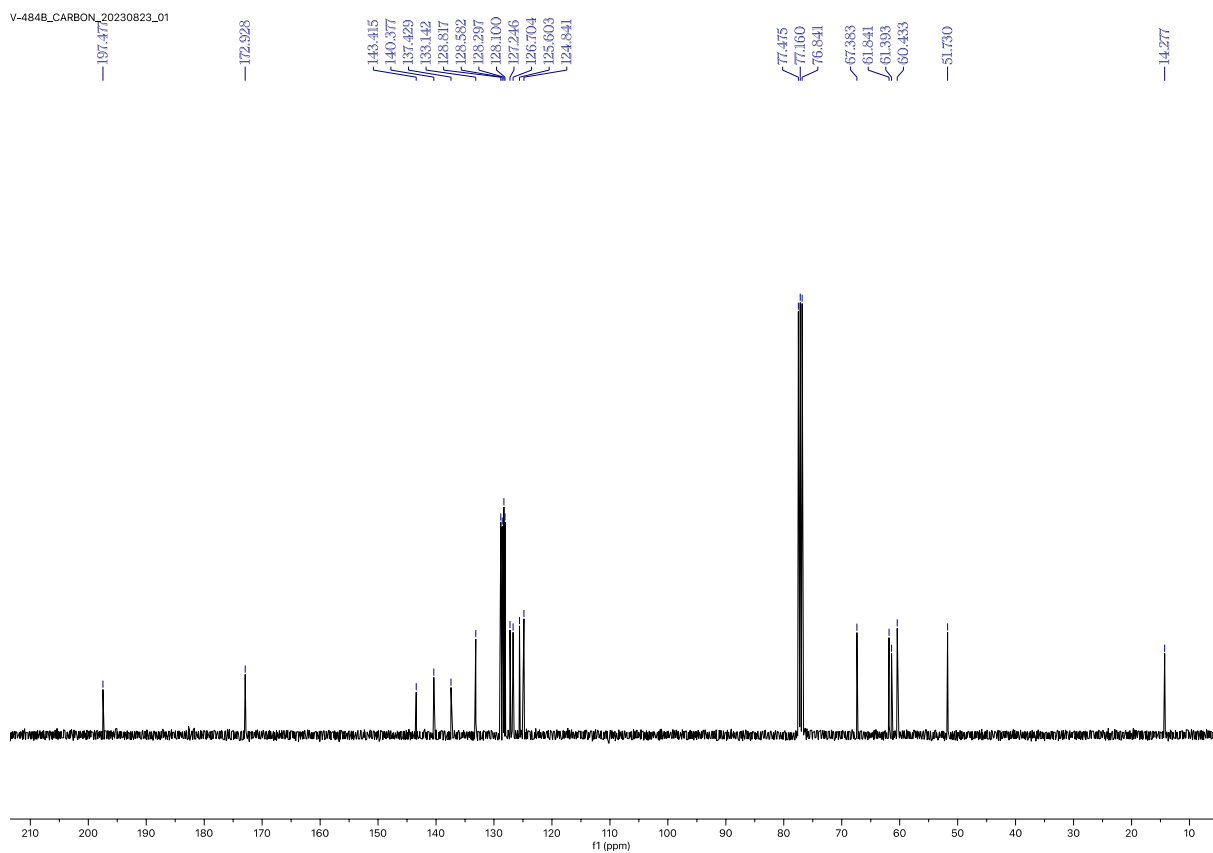

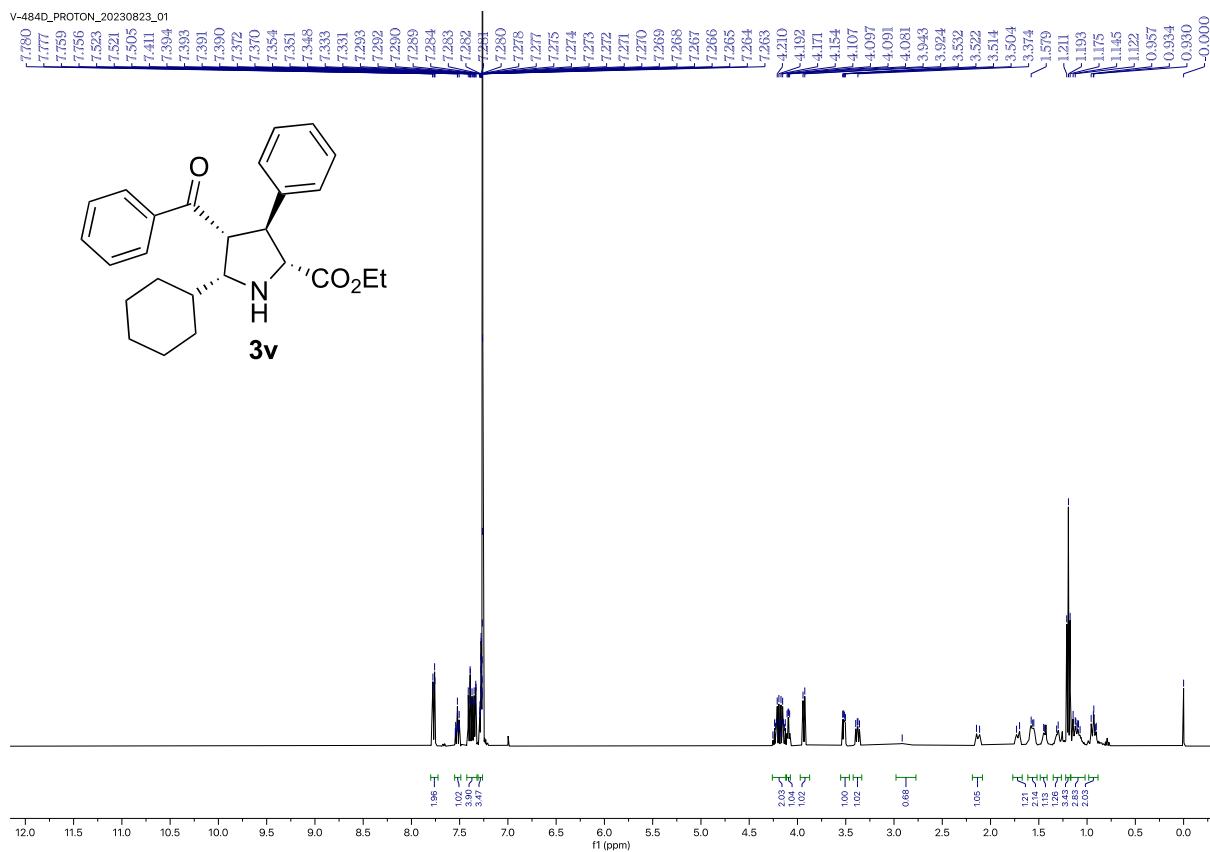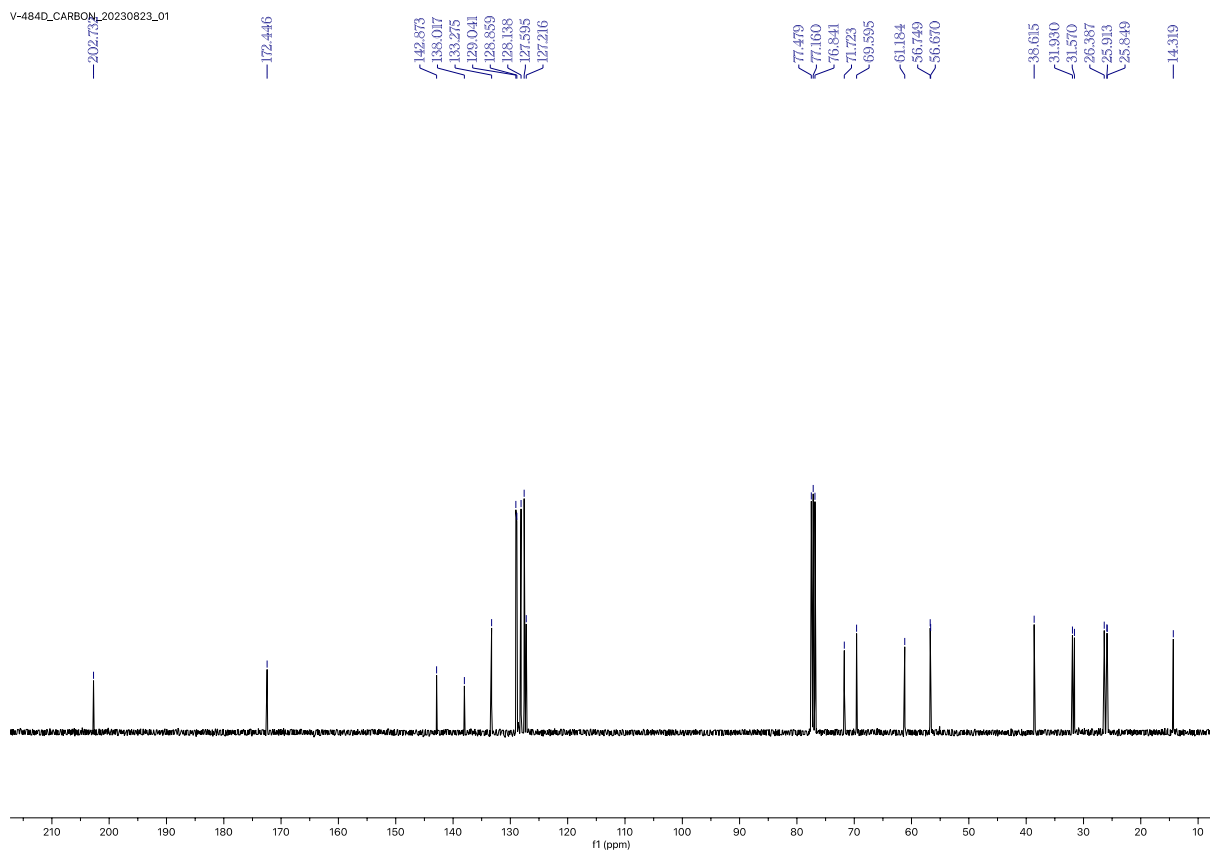



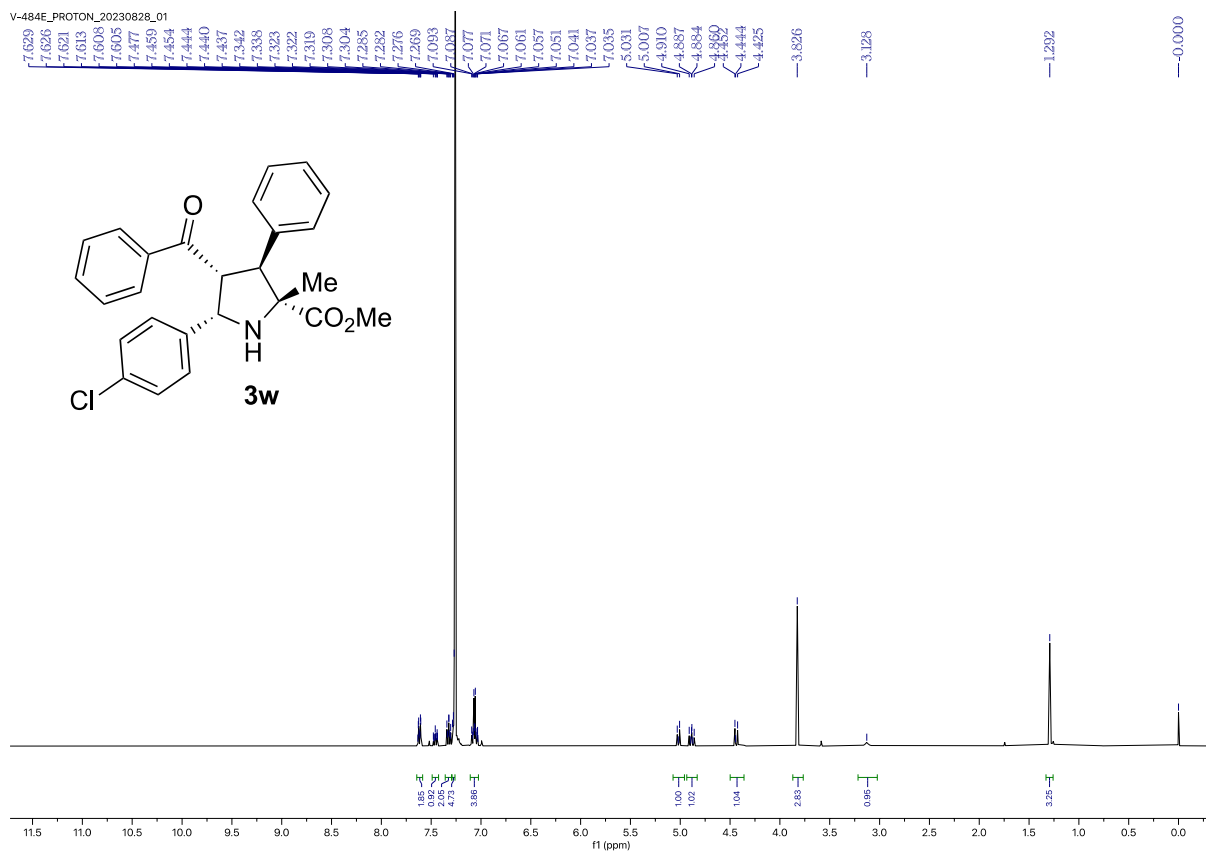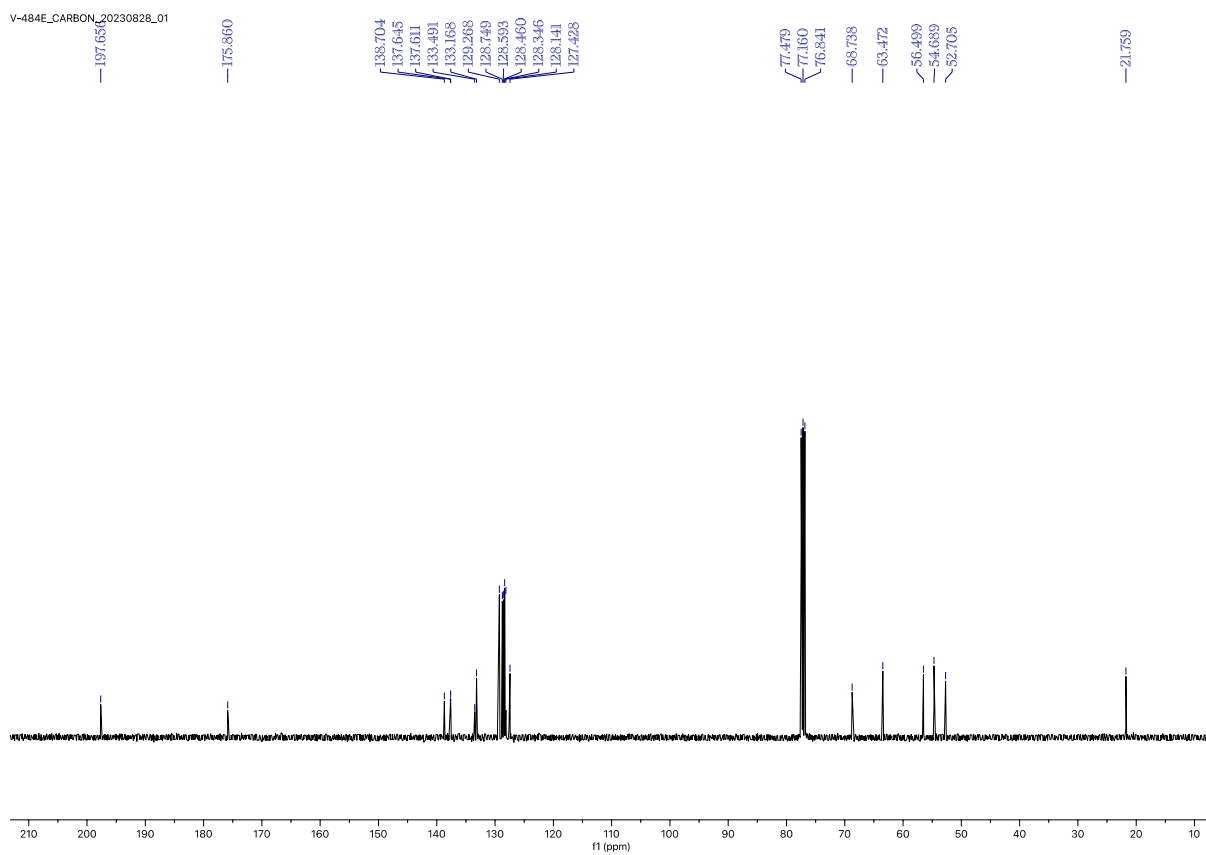

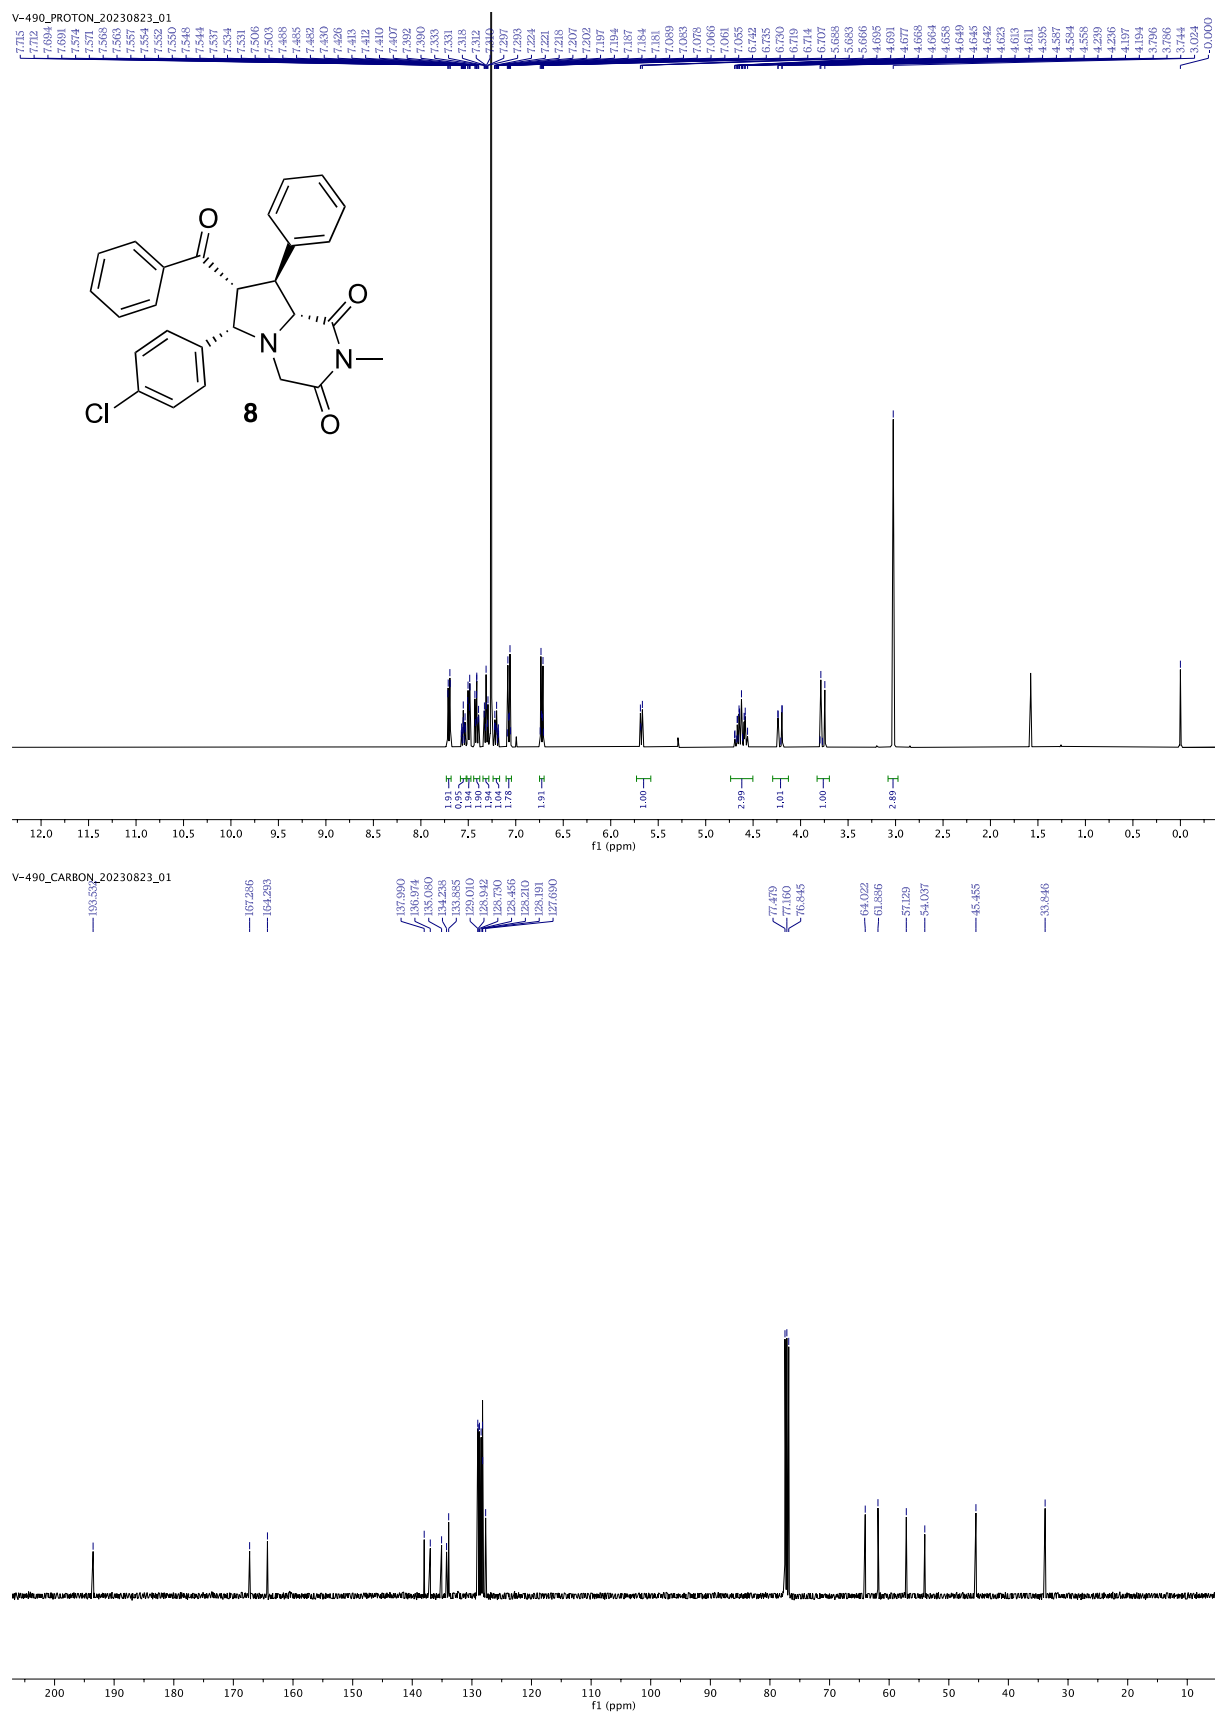

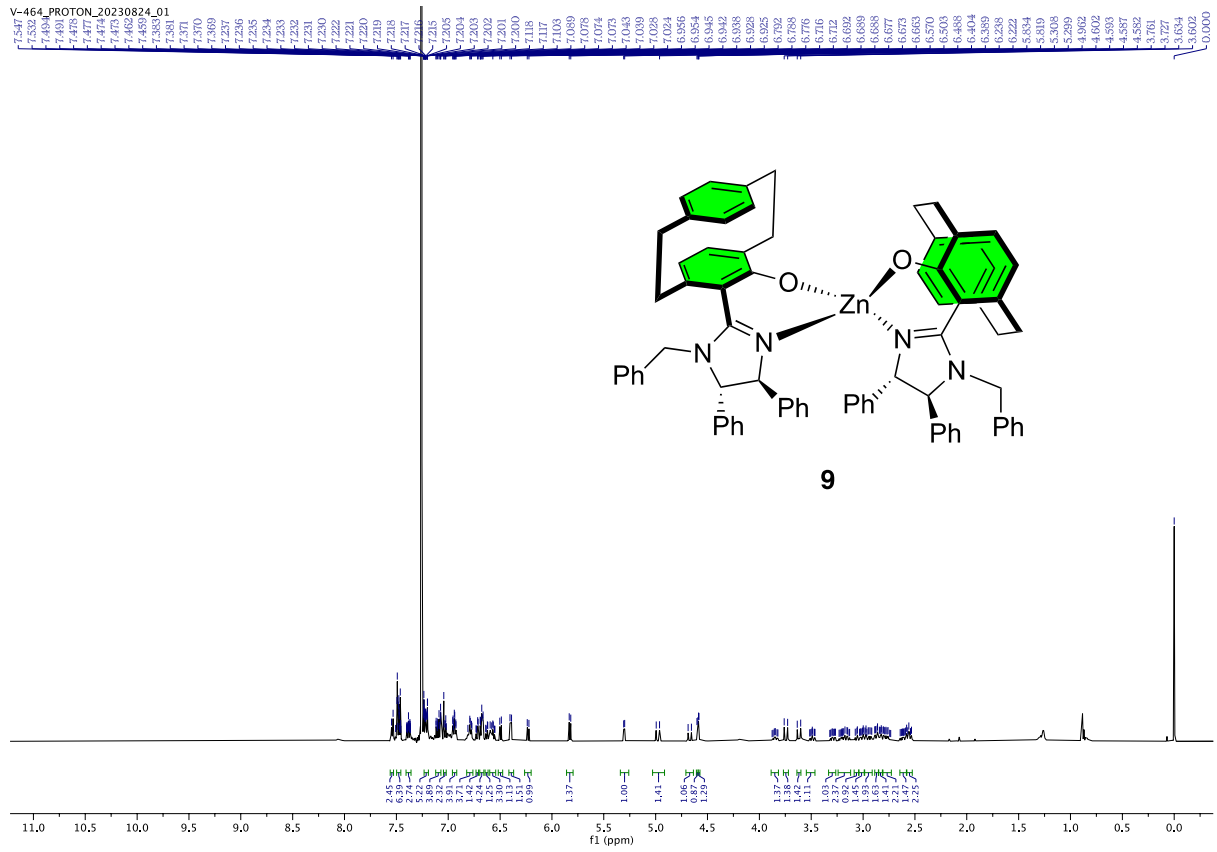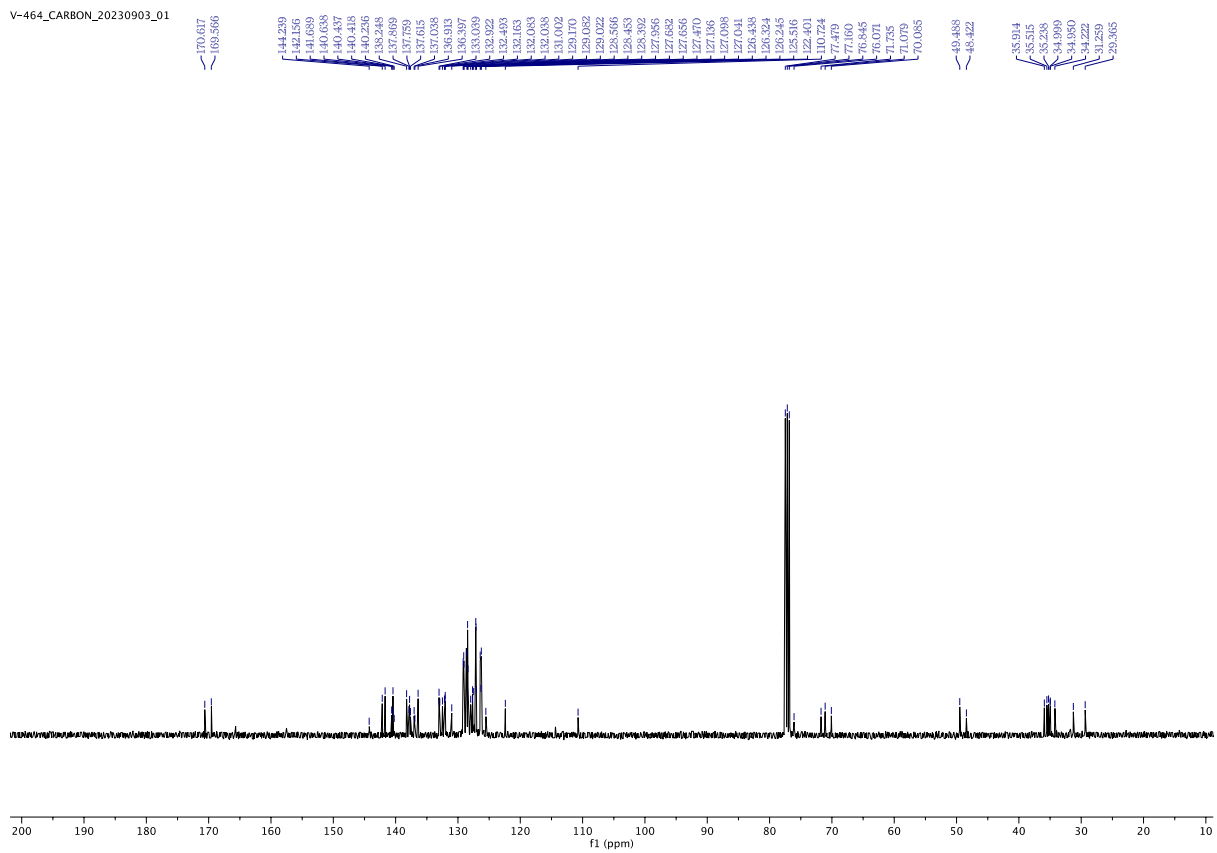

Supplement: d4ob00854e1.pdf [file d4ob00854e1.pdf]
